## **Title:** Epithelial zonation along the mouse and human small intestine defines five discrete metabolic domains

**Authors:** Rachel K. Zwick<sup>1</sup>, Petr Kasperek<sup>1†</sup>, Brisa Palikuqi<sup>1†</sup>, Sara Viragova<sup>1†</sup>, Laura Weichselbaum<sup>1†</sup>, Christopher S. McGinnis<sup>2†</sup>, Kara L. McKinley<sup>3</sup>, Asoka Rathnayake<sup>1</sup>, Dedeehya Vaka<sup>4</sup>, Vinh Nguyen<sup>5</sup>, Coralie Trentesaux<sup>1</sup>, Efren Reyes<sup>1</sup>, Alexander R. Gupta<sup>5</sup>, Zev J. Gartner<sup>2,6,7</sup>, Richard M. Locksley<sup>8,9</sup>, James M. Gardner<sup>5,10</sup>, Shalev Itzkovitz<sup>11</sup>, Dario Boffelli<sup>4</sup>, Ophir D. Klein<sup>1,4\*</sup>

### **Affiliations:**

<sup>1</sup>Program in Craniofacial Biology and Department of Orofacial Sciences, University of California, San Francisco, San Francisco, CA 94158, USA.

<sup>2</sup>Department of Pharmaceutical Chemistry, University of California, San Francisco, San Francisco, CA 94158, USA.

<sup>3</sup>Department of Stem Cell and Regenerative Biology, Harvard University, Cambridge, MA 02138, USA.

<sup>4</sup>Department of Pediatrics, Cedars-Sinai Medical Center, Los Angeles, CA 90048, USA.

<sup>5</sup>Department of Surgery, University of California San Francisco, San Francisco, CA 94143, USA.

<sup>6</sup>Helen Diller Family Comprehensive Cancer Center, San Francisco, CA 94158, USA.

<sup>7</sup>Chan Zuckerberg BioHub and Center for Cellular Construction 94158, University of California San Francisco, San Francisco, CA, USA.

<sup>8</sup>Department of Medicine and Department of Microbiology & Immunology, University of California San Francisco, San Francisco, CA 94143, USA.

<sup>9</sup>Howard Hughes Medical Institute, University of California, San Francisco, San Francisco, CA 94158, USA.

<sup>10</sup>Diabetes Center, University of California San Francisco, San Francisco, CA 94143, USA.

<sup>11</sup>Department of Molecular Cell Biology, Weizmann Institute of Science, Rehovot 7610001, Israel.

\* Corresponding author. Email: [ophir.klein@cshs.org](mailto:ophir.klein@cshs.org)

† These authors contributed equally

## 1 **Abstract**

2 A key aspect of nutrient absorption is the exquisite division of labor across the length of  
3 the small intestine, with individual classes of micronutrients taken up at different  
4 positions. For millennia, the small intestine was thought to comprise three segments  
5 with indefinite borders: the duodenum, jejunum, and ileum. By examining fine-scale  
6 longitudinal segmentation of the mouse and human small intestines, we identified  
7 transcriptional signatures and upstream regulatory factors that define five domains of  
8 nutrient absorption, distinct from the three traditional sections. Spatially restricted  
9 expression programs were most prominent in nutrient-absorbing enterocytes but initially  
10 arose in intestinal stem cells residing in three regional populations. While a core  
11 signature was maintained across mice and humans with different diets and  
12 environments, domain properties were influenced by dietary changes. We established  
13 the functions of *Ppar- $\delta$*  and *Cdx1* in patterning lipid metabolism in distal domains and  
14 generated a predictive model of additional transcription factors that direct domain  
15 identity. Molecular domain identity can be detected with machine learning, representing  
16 the first systematic method to computationally identify specific intestinal regions in mice.  
17 These findings provide a foundational framework for the identity and control of  
18 longitudinal zonation of absorption along the proximal:distal small intestinal axis.

19

## 20 **Introduction**

21 In the small intestine, regional specialization optimizes digestion by enabling distinct  
22 micronutrients to be sequentially absorbed at different anatomical positions.  
23 Traditionally, the small intestine has been separated into three loosely defined regions:  
24 the duodenum, jejunum, and ileum. These segment designations, which date back to  
25 observations made by the ancient Greeks, are thought to correlate with various  
26 absorptive processes, but their anatomical boundaries are vague<sup>1</sup>. In addition to  
27 differences in tissue structure and cellular composition along the length of the intestinal  
28 epithelium to support specialized functions, many genes show variable spatial  
29 expression patterns, as recently illustrated by single-cell RNA sequencing (scRNAseq)  
30 comparisons of epithelial cells from the classical regions of the mouse and human small

31 intestine and colon<sup>2-7</sup>. However, apart from the human duodenojejunal flexure, which is  
32 suspended by the ligament of Treitz, a lack of discrete landmarks to anchor these  
33 regional definitions precludes examination of the precise organization and properties of  
34 local niches within the small intestine. The extent to which the three classical parts of  
35 the small intestine explain the complexity of regional patterns in the tissue, and how  
36 these patterns respond to environmental changes such as nutrient fluctuations,  
37 pathogen exposures, and disease, is not clear.

38  
39 By contrast with the mammalian small intestine, the *Drosophila* midgut divides into 10-  
40 14 distinct compartments, of which a subset have been shown to contain intestinal stem  
41 cells (ISCs) with innate regional properties<sup>8-11</sup>. These findings raise the possibility that  
42 mammals may exhibit more finely grained intrainstestinal spatial differences than have  
43 been appreciated and that adult intestinal stem cells (ISCs) may program functional  
44 environments within the tissue. In line with the latter possibility, regional expression of  
45 numerous genes, including those associated with absorption, is maintained in mouse  
46 and human intestinal organoid cultures *ex vivo*<sup>12-14</sup>. However, the molecular programs  
47 encoded in ISCs that specify the expression of regionalized functional genes in their  
48 differentiated progeny are not known.

49  
50 Here, we report the transcriptional programs, associated metabolic functions, and  
51 locations of five previously undefined epithelial regions within the mouse and human  
52 small intestine. We track the refinement of regional patterns across the absorptive  
53 lineage from ISCs to specialized enterocytes and establish a cellular and molecular  
54 model explaining how they are maintained by epithelial-intrinsic mechanisms throughout  
55 adulthood.

56

## 57 **Results**

### 58 **Five groups of enterocytes occupy distinct zones along the proximal to distal** 59 **length of the mouse and human small intestine**

60 To study the mechanisms that maintain intestinal regionality, we took an unbiased  
61 approach to define the organization of the intestine on a molecular level, asking: how  
62 many functional domains, defined by distinct cellular states, are present in the  
63 mammalian small intestine? While previous studies of regional identity assumed the  
64 presence of three major regions – the duodenum, jejunum, and ileum – and sampled  
65 the intestine to best approximate their positions<sup>2-7</sup>, we set out to examine the small  
66 intestine without preconceptions. Our approach leveraged MULTI-seq scRNAseq  
67 multiplexing<sup>15</sup> to barcode cells collected from 30 equally sized segments spanning the  
68 entire length of the small intestines of both mouse and human (Fig. 1a). We used tissue  
69 from two *Lgr5*-GFP mice in which stem and progenitor cells – ISCs and their immediate  
70 transit amplifying (TA) cell progeny – express GFP, and from two human donors. We  
71 sequenced total epithelial cells (CD45<sup>-</sup>, pan-epithelial EpCAM<sup>+</sup>) and an equal number of  
72 progenitor cells (crypt marker CD44<sup>+</sup> in mouse and human cells, *Lgr5*-GFP<sup>+</sup> in mouse  
73 cells). We recovered a total of 19,847 mouse cells and 36,588 human cells (Fig. 1a,  
74 Extended Data Fig. 1-5, and Methods), including all progenitor and specialized intestinal  
75 epithelial cell types (Fig. 1, b and c, Extended Data Fig. 6), aside from CD45<sup>+</sup> tuft cells<sup>2</sup>.  
76

77 Visualization of the 30 segments in gene expression space for mouse and human  
78 scRNAseq data revealed pronounced shifts in cell state along the proximal:distal axis  
79 (Fig. 1, d,e). While regionally variable genes were evident in all epithelial cell types,  
80 including secretory cells (Extended Data Fig. 7a, Supplementary Table 1), such shifts  
81 were most stark in enterocytes, with > 80% of genes expressed by these cells in mouse  
82 and human being significantly zoned along the longitudinal axis ( $q < 0.05$  using  
83 Kruskal-Wallis test on genes with mean sum-normalized expression above  $5 \times 10^{-6}$ ). In  
84 the mouse intestine, vertical zonation from the crypt/villus base boundary to the tip of  
85 the villus, previously studied only in the jejunum<sup>16</sup>, was maintained across the

86 proximal:distal axis (Extended Data Fig. 7b-e). These data demonstrate the impact of  
87 cell position along multiple axes on enterocyte gene expression.

88

89 We next asked whether transcriptional progression along the proximal:distal axis of the  
90 small intestine is continuous, or if and where discontinuous transitions in gene  
91 expression divide the duodenum, jejunum, and ileum and/or an alternative set of  
92 regions. Focusing on enterocytes, which were the most highly zoned epithelial cell  
93 type, we computed the average expression of the 150 most regionalized genes in  
94 enterocytes from each segment and performed hierarchical clustering on the resulting  
95 data (Fig. 1f,g and Extended Data 8a). Remarkably, this computational approach  
96 reconstructed the anatomical order of segments in the mouse small intestine with  
97 almost perfect accuracy (cf. segment numbers in dendrogram Fig. 1f, where all  
98 segments are in the correct numerical order apart from segments 14-16 and 25),  
99 reinforcing the primacy of regional position in defining enterocyte transcriptional states.  
100 We also observed essentially perfect ordering of human segments, which were grouped  
101 into pairs due to cell number variability by segment (cf. segment pair numbers in  
102 dendrogram Fig. 1g, ordered accurately except for the missing pair 19-20, from which  
103 insufficient cell numbers were captured in the displayed sample).

104

105 The computational approach used to order segments was also used to define their  
106 higher-level organization. Specifically, the Euclidian distance between enterocyte gene  
107 expression in individual segments measured which segments had most similar  
108 expression profiles and clustered them accordingly. The resulting hierarchical clusters  
109 (dendrograms, Fig. 1f,g, Extended Data Fig. 8a) revealed the order in which segments  
110 form groups at increasingly higher levels. We used the gap statistic to estimate the  
111 optimal number of enterocyte clusters<sup>17</sup>. In this method, gap values rise more steeply  
112 with an increasing number of well-separated clusters and rise less steeply, or remain  
113 stable, with additional unnecessary clusters. In both mouse and human, five was the  
114 peak gap value prior to a flattening of the gap statistics (magenta bracket, Fig. 1h,i and  
115 Extended Data Fig. 8b, left). Notably, the boundaries of five domains were stable when

116 using fewer genes than 150, indicating that a five-domain superstructure is not  
117 dependent on the number of genes used for its identification (Extended Data Fig. 8c).  
118 Our clustering analysis revealed that mouse and human enterocytes optimally divide  
119 into 5 clusters of regional expression profiles, as displayed in the corresponding cuts of  
120 the dendrograms (Fig. 1h,i and Extended Data Fig. 8b, right).

121  
122 We then evaluated zonal enterocyte clustering based on a second metric, Jensen-  
123 Shannon divergence (JSD). JSD provides a separate method to evaluate shifts in gene  
124 expression based on quantification of the distances between enterocytes in segments  
125 plotted by UMAP. Hierarchical clustering of the resulting distance matrix for each mouse  
126 individually provided nearly identical results to our clustering based on the expression of  
127 regional genes (Extended Data Fig. 8d). Collectively, these data establish the positions  
128 of five domains of the intestine that contain transcriptionally distinct enterocytes. We  
129 have designated these regions domains A–E. On a morphological level, we observed  
130 that domains A–D displayed significantly different villus lengths, suggesting that the  
131 overall surface area available for nutrient absorption might differ between domains  
132 (Extended Data Fig. 8e).

133

### 134 **A progression of five distinct gene signatures divides the intestinal** 135 **proximal:distal axis**

136 We next investigated the identity and regional expression patterns of genes that  
137 delineate domains A–E (Supplementary Tables 2 and 3). Given similarities in the  
138 number and position of domains in mouse and human, we asked whether the species  
139 might share domain-defining genes. While regional profiles of genes such as human  
140 domain A signature gene adenosine deaminase (*ADA*) differed between species, we  
141 observed correlation between many of the most highly regionalized genes in both  
142 species (Fig. 2a,  $R_{\text{Spearman}} = 0.29$ , and see Methods). For example, expression of  
143 *Pdx1* and *Hoxb*, which encode homeobox proteins at the extreme ends of the intestines  
144 of both species, and of many genes required for nutrient processing along their lengths,  
145 suggests conserved regional specialization of tissue patterning and nutrient metabolism.

146

147 We noted that several genes displayed stark restriction to a single domain (i.e. another  
148 homeobox gene *Meis2* in domain A, the ileal fatty acid binding protein *Fabp6* in domain  
149 E), whereas others had broader expression, but with peaks in a given domain (i.e.  
150 sucrase isomaltase *Sis* in domain C) (Fig. 2b and Extended Data Fig. 8f). To determine  
151 whether these individual trajectories were representative of aggregate gene expression  
152 patterns that define each domain, we plotted signature scores based on the mean  
153 scaled expression of the top 20 domain-defining genes for each domain across the  
154 length of the intestine (Fig. 2c,d). Domains A, D, and E had regionally confined scores,  
155 illustrating their distinct transcriptomic signatures. Domains A and B directly overlap in  
156 the proximal-most intestine of both species, the key difference between these domains  
157 being that a small set of unique domain A-specific genes decline sharply, whereas  
158 genes common to both groups gradually decline over a larger area. While domain C  
159 displayed the least zonated molecular profile of the five domains, reflected by the broad  
160 expression of defining genes outside of domain C, its expression pattern was clearly  
161 distinct from those in neighboring domains in both species. Domain E-associated  
162 transcripts emerge where domain D declines and maintain high expression at the  
163 extreme distal end of the small intestine.

164

165 We then investigated the larger gene expression programs underlying the five domains  
166 reflected by their signature scores using non-negative matrix factorization (NMF). NMF  
167 detects co-expressed gene modules and, unlike the signature score approach, is  
168 agnostic to putative domain boundaries defined in our study. In both mouse and human,  
169 we detected modules that displayed variability across the small intestine (Fig. 2e, f and  
170 Supplementary Table 4). Many of these modules contained top regional signature  
171 genes (from Supplementary Tables 2 and 3), and their expression trajectories across  
172 the intestine grouped into patterns that recapitulated the signature scores. We observed  
173 two groups of components that were highly expressed at the proximal end of the  
174 intestine and declined across different breadths (as with domains A and B); components  
175 that rose and fell within the boundaries of the small intestine that organize into two



176 groups – one that peaked around the center of the intestine and one that peaked mid-  
177 way through the distal half of the intestine (roughly within the boundaries of domains C  
178 and D); and finally components that increased concurrently with the decline of domain  
179 D-associated components and did not decline within the tissue (as with domain E).  
180 Thus, our NMF analysis reinforced the presence of five major patterns of regional gene  
181 expression by enterocytes across the intestine.

182

### 183 **Domain identity can be detected across samples and used for systematic** 184 **classification of intestinal regions**

185 We used multiplexed single-molecule *in situ* hybridization to validate domain  
186 assignments by probing multiple regional signature genes across coiled, full-length  
187 murine intestinal tissue (Fig. 3a and Extended Data Fig. 9-10) and human tissue  
188 collected from precise positions (Fig. 3b,c and Extended Data Fig. 11). In mice,  
189 segregated localization was observed for the domain A and D markers *Meis2* and *Plb1*.  
190 Also regionally confined were genes encoding fatty acid binding proteins 1 and 6  
191 (*Fabp1* and *Fabp6*), markers of domains A/B and E respectively, which encode different  
192 aspects of fat metabolism. In human tissue, domain A can be distinguished by human-  
193 specific domain A marker *ADA* and domain D by *PLB1*, as in mice. *SLC10A2* and  
194 *FABP6* are both expressed in domains D and E, with highest levels observed in domain  
195 E. These data support the patterns identified by scRNAseq and highlight the transitions  
196 in regional gene expression on a tissue level.

197

198 We then sought to use the domain structure we defined in our mouse data to predict  
199 domains in other datasets. We employed a machine learning approach called transfer  
200 learning<sup>18</sup> to train a classifier on the gene expression patterns of the domains defined by  
201 our mouse data. We then used the classifier to predict domain identities of enterocytes  
202 from a second cohort of two mice for which we collected data from 30 segments using  
203 the same procedure as in Fig. 1A (Extended Data Fig. 12). The domain boundaries  
204 inferred from the predictions were largely consistent with the boundaries defined in our  
205 first cohort (only the boundary between domains B–C was shifted by 2-3 segments, Fig.



206 3d). These data indicate that the discrete nature of the five domains can be used to  
207 predict the domain positions in other datasets.

208

209 We then used the trained classifier to predict the domain identities of cells sequenced in  
210 the original single-cell survey of the murine small intestine<sup>2</sup>, in which cells were  
211 categorized as deriving from the duodenum, jejunum, or ileum (Fig. 2e). Without a  
212 consistent method to define regionality within the intestine, we could not align our  
213 domain assignments to these traditional regions with precision, but based on the  
214 authors' methodologies we estimated that the duodenum would align predominantly  
215 with domains A and B, the jejunum with B–D, and the ileum with E and a small portion  
216 of D. We found that domain predictions for most or all cells deriving from the duodenum,  
217 jejunum, and ileum aligned closely with our expectations. In the second sample  
218 sequenced in the original study, the model predicts fewer domain A cells, and more  
219 domain C cells, in the duodenal sample than expected, which may reflect minor  
220 differences in sampling strategies and is consistent with our observation that the  
221 position of the domains B–C boundary is more difficult to predict than others (Fig. 3d).  
222 Overall, the machine learning results support the presence of multiple distinct and  
223 recognizable transcriptomic signatures that align with five domains in the small intestine.

224

### 225 **The five domains reflect distinct functional zones of nutrient metabolism**

226 To broadly evaluate whether the five computationally defined domains reflect significant  
227 differences in intestinal function, we determined the metabolic activities of all  
228 differentially expressed genes in enterocytes from each domain and analyzed those  
229 associated with nutrient absorption (Fig. 4a and Supplementary Table 5). In both  
230 species, domains A and B were most strongly associated with metabolism of fatty acids;  
231 domain C with carbohydrate metabolism; domain D with chylomicron and lipoprotein  
232 metabolism (which was also highly enriched in domain C in human) as well as amino  
233 acid transport; and domain E with cholesterol and steroid metabolism. In line with the  
234 high degree of transcriptional overlap between domains A and B (Figs. 2c–f), these  
235 domains were associated with many common processes, although in mouse, domain A

236 was uniquely associated with iron uptake, and in both species, it displayed distinct  
237 transcripts associated with ion handling. Although domain C was largely defined by lack  
238 of expression of genes found in other domains (Fig. 1f,g), it was characterized by the  
239 highest expression of genes belonging to the carbohydrate transcriptional program<sup>19</sup>,  
240 indicating that domain C also performs a distinct physiological role. We similarly  
241 analyzed relevant NMF components (Fig. 2e,f), which provided a more distinct view not  
242 restricted by domain boundaries, of the regional span of co-expressed genes that  
243 encode nutrient metabolism proteins (Extended Data Fig. 13). For example, the  
244 formation of chylomicrons was more significantly enriched in domains C and D as above  
245 but detected at lower levels across domains A–D in both species. Overall, the regional  
246 patterns we identified were highly similar between the mouse and human intestine and  
247 reflect major aspects of nutrient absorption.

248  
249 These functional analyses suggest that the highest levels of lipid and carbohydrate  
250 metabolism occur in distinct domains when mice are fed standard chow: fatty acid  
251 metabolism most prominently in domains A and B, phospholipid metabolism in domain  
252 D, and carbohydrate absorption more broadly across the intestine but peaking in  
253 domain C. We hypothesized that enterocytes within these domains would differentially  
254 upregulate transcripts encoding the enzymes, receptors, and/or binding proteins needed  
255 to absorb an increased lipid or carbohydrate dietary load. To test this prediction, we fed  
256 mice either standard chow, a high-fat / low-carbohydrate diet, or an isocaloric high-  
257 carbohydrate / low-fat diet<sup>19</sup>. After 7 days (a time interval sufficient for enterocyte  
258 response to a change in dietary load<sup>19-21</sup>), we sequenced single epithelial cells as in Fig.  
259 1a, this time from 15 equally sized segments across the intestine such that segment 1  
260 corresponded to previously sequenced segments 1 and 2, and so forth. We obtained  
261 27,881 high quality cells from the absorptive lineage (stem cells, TA cells, and  
262 enterocytes) from three mice for each diet (Extended Data Fig. 14).

263

264 We applied the domain identity-trained classifier (Fig. 3d) to predict the domains of cells  
265 from mice fed each diet. The resulting prediction curves (Fig. 4b) were highly consistent  
266 across the three biological replicates per diet group and tracked the presence and  
267 position of five domains regardless of diet, in support of the robust nature of domain  
268 identity despite major dietary changes. Notable, however, was the broadening of the  
269 area associated with domain C in mice fed a high-carbohydrate diet into regions  
270 normally occupied by domains B and D (c.f. green line in segments < 5 and > 10 in  
271 high-carbohydrate diet, Fig. 4b). In segments of peak domain D prediction, a similar or  
272 higher percentage of cells were classified with a domain C identity, which may suggest  
273 that enterocytes with both domain properties co-reside at this position. This analysis  
274 suggests that enterocytes with domain C molecular and functional properties occupy a  
275 wider proportion of the small intestine, likely either in response to dietary lipid reduction  
276 or to carbohydrate augmentation.

277

278 We used NMF to examine gene modules and associated functions underlying this  
279 apparent shift in regional identity. Several, but not all, domain-associated modules were  
280 differentially expressed in mice fed high-fat versus high-carbohydrate diets (Fig. 4c, top  
281 half, Supplementary Table 4). Module 6 was strongly associated with carbohydrate  
282 absorption, and indeed we observed higher levels, over a larger region, of domain C  
283 signature genes that encode components of carbohydrate digestion, including maltase-  
284 glucoamylase (*Mgam*) and sucrase isomaltase (*Sis*), in mice fed a high-carbohydrate  
285 diet (Fig. 4c).

286

287 As previously noted, multiple NMF components collectively encode domain identity (Fig.  
288 2e), and we also observed elevated expression of other modules such as 7 and 9  
289 following high-carbohydrate feeding. Interestingly, module 9 included signatures of both  
290 domains C and D, and we observed a diet-selective response of genes within this  
291 component. Intestines from mice fed a high-fat diet upregulated domain D-associated  
292 module 9 genes as well as domains A and B-associated module 11, which were both  
293 functionally tied with lipid metabolism (Fig. 4c). Inspection of individual module

294 components revealed that domain B genes known to play important roles in fatty acid  
295 metabolism<sup>22</sup> and domain D genes in chylomicron assembly and triglyceride  
296 metabolism, were most strongly enriched, especially in their respective domains (Fig.  
297 4d). Interestingly, domain E-associated module 10 appeared completely unaffected by  
298 these dietary interventions (Fig. 4c).

299  
300 Together, hierarchical clustering of gene expression in single cells identified  
301 regionalized enterocyte domains in the mouse and human intestine that we  
302 experimentally validated using multiplexed ISH. Dietary challenge experiments  
303 demonstrated unique domain responses to individual nutrients and support the  
304 functional roles of domains A/B and D in lipid metabolism and domain C in carbohydrate  
305 absorption.

306

### 307 **Three regional stem cell populations reside within the small intestine**

308 Having established patterns of specialized gene expression in enterocytes, we next  
309 asked at what stage of differentiation of the absorptive lineage these patterns emerge.  
310 As we captured a higher number of mouse than human stem cells per segment with  
311 scRNAseq, we focused this analysis on the murine absorptive lineage as a model.  
312 Theoretically, enterocytes could differentiate with little to no initial regional identity and  
313 take on local metabolic programs in response to microenvironmental cues; alternatively,  
314 enterocyte fate could be pre-determined by regionalized subpopulations of  
315 stem/progenitor cells. We found that mouse ISCs displayed localized gene expression  
316 (Fig. 1d), although less markedly than enterocytes, with 46% of genes expressed by  
317 crypt cells significantly varying along the proximal-distal axis ( $q < 0.05$  for genes with  
318 mean sum-normalized expression above  $5 \times 10^{-6}$ ). We again applied Euclidian (Fig. 5a)  
319 and Jensen-Shannon (Extended Data Fig. 15a) distance metrics to calculate expression  
320 distance and perform hierarchical clustering of ISCs based on the top 100 most  
321 regionalized genes in this cell type. Hierarchical clustering showed that murine ISCs  
322 assembled into 3 regions well supported by the gap statistic (Fig. 2b) and with  
323 boundaries that fell within 2 segments of each of those that delineated absorptive

324 domains B/C and D/E. JSD also indicated three groups, albeit with slightly different  
325 boundary positions. We favored the positions established with Euclidian distances as  
326 they draw directly from the gene expression matrix rather than a 2D projection. We refer  
327 to these populations as regional ISCs 1–3.

328  
329 As ISCs constitute only ~1% of the total intestinal epithelium, they have been minimally  
330 sampled in previous reports, and our progenitor enrichment strategy enabled detection  
331 of new regional ISC markers (Supplementary Table 6). For example, in addition to  
332 known proximal and distal ISC markers (e.g., *Gkn3* and *Aadac* in region 1 and *Bex4* in  
333 region 3<sup>2,23</sup>), ISCs differentially expressed *Ttr* and *Sycn* in region 1 and *Cd177* in region  
334 3 (Fig. 5c). In line with previous reports<sup>23,24</sup>, we observed bacterial response genes  
335 *Defa21* and *Defa22* enriched in region 3 ISCs (Supplementary Table 6), suggesting a  
336 possible role for the regional microbiome or immune environment in shaping crypt  
337 zones.

338  
339 We confirmed the spatial specificity of a subset of ISC markers using single-molecule  
340 ISH (Fig. 5d and Extended Data Fig. 15c–f, 16a,b). Whereas many markers were  
341 exclusively expressed by early-lineage cells (Extended Data Fig. 15b), we also noted a  
342 few shared regional markers between ISCs and later lineage cells such as  
343 hydroxymethylglutaryl (HMG)-CoA synthase 2 (*Hmgcs2*), which encodes a ketone body  
344 production enzyme. Expression of *Hmgcs2* expanded dramatically across the small  
345 intestine in response to a fat free diet, as would be expected upon initiation of  
346 ketogenesis, but other regional ISC markers such as *Gkn3* and *Bex1* remained stable  
347 regardless of dietary lipid levels (Extended data 15g). Furthermore, although regional  
348 gene expression in mouse and human crypt cells was not as tightly correlated as for  
349 enterocytes (Fig. 5e, RSpearman = 0.18, p=6.74e-55), many transcripts such as the  
350 classic regional identity marker *Onecut2* in region 1 ISCs, and *Hoxb* genes and *Bex1*  
351 and 4 in region 3 ISCs, showed similar expression profiles in both species.

352

353 We then used hierarchical clustering to model the point in the absorptive lineage at  
354 which these groups branch into 5 distinct enterocyte domains. We calculated the  
355 average expression of the most highly regionalized genes in TA cells and enterocyte  
356 progenitor cells from each segment, performed hierarchical clustering on the resulting  
357 data, and used the gap statistic to determine the optimal number clusters formed by  
358 these cell types. Our analysis indicated that 3 stem cell populations give rise to 3 TA cell  
359 populations, which then give rise to 4 groups of enterocyte progenitors that ultimately  
360 specialize into 5 distinct enterocyte populations (Fig. 1h and 5b).

361

### 362 **Transcriptional control of enterocyte regional identity**

363 Given the broad zonation detected in early absorptive lineage cells (Fig. 5b, ISCs and  
364 TA cells), we wondered whether regionalized programs in ISCs might contribute to  
365 establishing the fate of enterocytes in each domain. In line with this possibility, previous  
366 reports<sup>12-14</sup> have demonstrated that regional gene expression is maintained through  
367 long-term culture of organoids, and we observed maintenance of domain signature  
368 genes (Supplementary Table 2), including 27% of domain A genes and 30% of domain  
369 E genes, in their respective domain-specific organoid cultures (Fig. 6a, > 2.0 fold  
370 change, < 0.1 FDR, and qPCR validation of select signature genes in Extended Data  
371 Fig. 16c). While mesenchymal Wnt signals drive anterior-posterior small intestinal  
372 patterning during morphogenesis<sup>25,26</sup>, retention of location-specific transcript levels *in*  
373 *vitro* suggests that in the adult organ, some aspects of regional specialization are  
374 encoded within epithelial cells. Indeed, the best known small intestinal patterning  
375 factors, PDX1 and GATA4<sup>26-31</sup>, are expressed by epithelial cells.

376

377 To advance our understanding of the mechanisms that delineate the small intestinal  
378 domains defined here, we generated a model of epithelial-intrinsic transcription factors  
379 predicted to control the identity of every domain. We first used the gene regulatory  
380 network inference tools ChEA3<sup>32</sup> and SCENIC<sup>33</sup> to construct, from scRNAseq data, a  
381 predictive model of the transcription factors that are most likely to control domain-  
382 specific gene expression in enterocytes (Extended Data Fig. 17, Supplementary Tables

383 7 and 8). Notably, highly ranked factors on our list included established the zonation  
384 factors *Pdx1*<sup>26-31</sup> and *Gata4*<sup>26-31</sup>, but many others were factors not previously associated  
385 with zonation.

386

387 Domain E is delineated from domain D by a sharp transition in expression of *Fabp6* and  
388 other domain-specific genes (Fig 2b), and it appears to be disproportionately affected by  
389 several largely regionally confined gastrointestinal diseases such as ileitis and  
390 necrotizing enterocolitis. Thus, we focused on domain E as a test case. We first ordered  
391 all enterocyte lineage cells in the domain according to inferred differentiation stage  
392 using slingshot<sup>34</sup>, allowing us to plot expression of each putative patterning factor  
393 across differentiation states (Extended Data Fig. 18a). Factors generally showed one of  
394 two trajectory patterns: highest expression in early lineage cells that declines as  
395 enterocytes differentiate, and expression in differentiated enterocytes or their immediate  
396 progenitors rather than early lineage cells(Extended Data Fig. 18b,c).

397

398 As we hypothesized that domain identity in enterocytes might be controlled at the level  
399 of ISCs, we first focused on putative patterning factors expressed most highly by ISCs  
400 and TA cells. Prominent among these candidates were homeobox genes that pattern  
401 the early gastrointestinal tract, but whose role in pattern maintenance during adulthood  
402 is less well understood. *Caudal type homeobox1 (Cdx1)* was expressed most highly in  
403 early-lineage cells (Fig. 6b) and specifically in region 3 ISCs and distal human ISCs  
404 (Fig. 6c and Extended Data Fig. 18d). *Cdx1*, 2, and 4 are important regulators of  
405 hindgut patterning<sup>35</sup>. While the importance of *Cdx2* for the structure, function, and gene  
406 expression of the adult intestine is clear<sup>36,37</sup>, the role of *Cdx1* in the adult intestine has  
407 been more challenging to determine<sup>36,38</sup>.

408

409 To test our prediction that *Cdx1* maintains the metabolic profile of distal regions during  
410 adult homeostasis, we used two CRISPR-Cas9 gene editing strategies (Extended Data  
411 Fig. 19a,b, resulting in two batches of expression data) to delete the gene in domain E  
412 organoids, in which its expression is normally elevated relative to domain A organoids



413 (Fig. 6e). *Cdx1* mutant organoids showed a trend towards decreased expression of the  
414 predicted target gene *Fabp6* that was consistent in both batches (Extended Data Fig.  
415 19c,d); *Fabp6* is a domain E marker that is stably maintained in domain E organoids  
416 (Fig. 6a and Extended Data Fig. 16c). These data support our prediction that *Cdx1*  
417 promotes expression of the principal gene controlling long-chain fatty acid metabolism  
418 in the distal intestine, and more broadly, that regional patterning factors expressed as  
419 early as the ISC stage can control downstream aspects of nutrient processing and  
420 domain identity in enterocytes. It is likely that other patterning factors in the small  
421 intestine, such as *Gata4*, which is known to repress expression of several distal genes  
422 including *Fabp6*, function in concert with *Cdx1* to control domain E identity<sup>28</sup>.

423  
424 We also tested our prediction that *Ppar- $\delta$* , a known regulator of fatty acid oxidation and  
425 intestinal metabolism<sup>39-41</sup>, controls enterocyte genes associated with lipid processing in  
426 domain E. *Ppar- $\delta$*  modulates ISC metabolic response to diet<sup>40,41</sup>, and while we observed  
427 expression in early-lineage cells, this transcription factor was representative of those  
428 enriched in late lineage cells (Fig. 6b). *Ppar- $\delta$*  was expressed at slightly higher levels in  
429 domain E than in other domains in mouse and human (Fig. 6c and Extended Data Fig.  
430 18d), a pattern that was recapitulated in long-term organoid culture (Fig. 6d). We  
431 performed CRISPR-modified deletion of *Ppar- $\delta$*  in domain E organoids in the same  
432 manner as described for *Cdx1*.

433  
434 Bulk RNAseq of *Ppar- $\delta$*  mutants and controls, and qPCR validation of a subset of  
435 results, revealed differential expression of genes and enriched pathways associated  
436 with fat metabolism, including known PPAR target genes (Fig. 6e and Extended Data  
437 Fig. 19c,e,f). We observed decreased expression of domain E marker *Fabp6* and  
438 increased domain D-associated phospholipase (*Plb1*) levels. Interestingly, we observed  
439 upregulation of several genes that encode fatty acid metabolism enzymes such as  
440 ACADL, and ACOT1 and 4, that are specifically expressed in domain A in vivo during  
441 homeostasis (Fig. 6f), that are maintained in domain A organoid cultures (Fig. 6g). *Ppar- $\delta$*   
442 loss in domain E organoids thus shifts regional organoids to a proximal lipid

443 metabolism profile and supports our prediction that *Ppar- $\delta$*  maintains the expression  
444 signature of Domain E. *Ppar- $\delta$*  works in concert with proximally-enriched *Ppar- $\alpha$ <sup>41</sup>*; our  
445 results suggest that precise regional distribution of these factors may underlie PPAR-  
446 mediated patterning of lipid absorption across the intestine.

447  
448 Collectively, these studies indicate that epithelial-intrinsic factors that are regionally  
449 expressed by cells at multiple stages of differentiation of the absorptive lineage  
450 participate in the stable maintenance of enterocyte domain identity across the adult  
451 intestine.

452

## 453 **Discussion**

454 We have identified boundaries that divide the small intestine into five regional domains  
455 in both human and mouse, based on gene expression programs involved in nutrient  
456 absorption (Fig. 6h). Domain A, which likely represents the duodenum based on length  
457 and confined expression of the classic duodenal gene *Pancreatic and duodenal*  
458 *homeobox 1 (Pdx1)*, contained cells from segments upstream of the ampulla of Vater,  
459 where both bile and exocrine pancreatic secretions enter the intestine. A small set of  
460 domain A-specific genes rapidly declines in expression at the domain A-B boundary,  
461 including the homeobox gene *Meis2*, which represents a novel marker of this region;  
462 genes that encode subunits of the iron storage protein ferritin (*Fth1* in mouse, and, in a  
463 less starkly zonated manner, *FTL* in human); and genes involved in ion uptake.

464

465 Domain B overlaps with domain A in the first 6–10% of the intestine in both species; its  
466 proximal boundary is defined by termination of domain A-specific genes. Our analyses  
467 predict that these two domains are seeded by a common regional stem cell, and major  
468 physiological processes such as fatty acid metabolism occur in both domains. The gene  
469 constituents of neighboring domain C, which are most prominently associated with  
470 carbohydrate absorption, are also broadly expressed lengthwise, suggesting a wide  
471 range in which sugars are absorbed and metabolized. There are fewer positive markers  
472 of domain C than in neighboring domains, and we speculate that the presence of an

473 intermediate region between domains B and D may allow for more plasticity to respond  
474 to environmentally induced shifts in transcriptional programs. In line with this possibility,  
475 domain C is the only domain that displayed a major size-wise change when mice were  
476 fed a reduced fat / increased carbohydrate diet. Further, the hierarchical clustering  
477 approach defines domain C in the second human donor more narrowly than in the first  
478 donor and in the mouse, possibly due to dietary differences. However, we also note that  
479 the expression of the domain C-defining NMF module in the second donor is broader  
480 than the hierarchical clustering results suggest. We believe that this difference reflects  
481 our overall conclusion that the boundary between domains B and C is not sharply  
482 defined and is subject to changes in response to environmental stimuli, but that these  
483 domains are delineated by independent molecular profiles that encode proteins required  
484 to execute non-overlapping functions.

485

486 Genes that encode ileal-specific functions, such as vitamin B12 uptake (*Cubn*) and bile  
487 salt recycling (*Slc10a2* and *Fabp6*), are enriched in domains D and E, suggesting that  
488 these regions best approximate the ileum, although our classification of previously  
489 published data suggest that domain D is likely included in studies of the murine jejunum.  
490 In both mouse and human, domain D declines as domain E increases with a small  
491 degree of overlap between two distinct gene modules. The domain D associated  
492 module is responsible for amino acid uptake and plasma lipoprotein processing and, as  
493 demonstrated by our dietary lipid modulation studies, is highly responsive to changes in  
494 dietary lipid loads. Domain E is predicted to function instead in metabolizing steroids  
495 and cholesterol, and remarkably, was found in our studies to be perfectly stable  
496 alongside substantial remodeling in the domain immediately adjacent in response to  
497 acute dietary change, suggesting that the intestinal area known as the ileum divides into  
498 two functional distinct parts. Future studies to evaluate whether this domain is innately  
499 less malleable, or whether it adapts to dietary cholesterol levels and cholesterol  
500 lowering drugs such as bile acid sequestrants, would be of significant interest.

501

502 The similarity of domain organization between mouse and human is striking, given the  
503 dietary and microbiome differences between humans and laboratory mice. Conservation  
504 and maintenance of spatial patterns of nutrient absorption across two mammalian  
505 species existing in radically different conditions supports the importance of an intrinsic  
506 intestinal positional system. *Ex vivo* maintenance of transcription factors including *Ppar-*  
507  $\delta$  and downstream target genes that define domain-associated metabolism lends further  
508 support to the idea that domain identity is hardwired in the adult intestine, presumably  
509 on a stem cell level. The three regional ISC populations identified here express factors  
510 predicted to direct specialization of enterocytes within the same regions, with *Cdx1* as  
511 one validated example by which *Fabp6* in enterocytes is controlled, at least in part, by a  
512 gene expressed most highly in stem cells. Several recent studies have demonstrated  
513 that metabolic programs such as ketogenesis<sup>42</sup>, fatty acid oxidation<sup>43</sup>, and sterol  
514 exposure<sup>44</sup> can profoundly influence the fate decisions and regenerative behavior of  
515 ISCs and TA cells. These data add to our growing understanding of the roles of ISCs in  
516 defining local metabolic environments within the small intestine.

517  
518 While core domain identities are stable, our studies demonstrate that gene expression  
519 levels and domain boundaries can adapt to nutritional cues. Further studies are needed  
520 to dissect the response of each domain to specific nutrients and other epithelial-extrinsic  
521 factors, such as the commensal microbiome and surrounding mesenchyme. Indeed, the  
522 small intestine has an impressive capacity to adapt to disruptions: bowel resection leads  
523 to a shift in expression of regional genes<sup>45</sup>, and parasite infection remodels crypt cell  
524 identity<sup>46</sup>, total intestinal length, and specialized cellular distribution<sup>47</sup>. How the  
525 epithelial-intrinsic organization and patterning mechanisms identified here may  
526 modulate and be modulated by the enteric microenvironment is an important question  
527 for future work.

528  
529 A limitation of our study is human sample number; we sequenced the full-length  
530 intestines of two organ donors and performed selected validation for each domain on 2  
531 additional donors. While we report salient aspects of domain organization across these

532 individuals and species, analysis of additional subjects will strengthen our  
533 understanding of a core domain signature shared by humans and will undoubtedly  
534 reveal further intricacies that vary between people in diverse environments. A  
535 consequence of the number of human samples included, and of the greater variability  
536 between samples, is that our dataset was not sufficient to train a classifier to  
537 consistently recognize human cells in previously published datasets. For mice, however,  
538 we introduce a machine learning-based approach to identify the peak and boundary  
539 positions of five domains. This is the first systematic method to precisely track regions  
540 of the mouse intestine and provides a molecular classification system that future studies  
541 can utilize for consistent identification of relevant intestinal regions.

542

543 Finally, the similarities observed between mouse and human enteric regional  
544 organization have implications for understanding the regional distribution of  
545 gastrointestinal diseases that predominantly affect confined portions of the tissue,  
546 including celiac disease and adenocarcinomas in the proximal small intestine; and  
547 carcinoid tumors, lymphomas, necrotizing enterocolitis (NEC), and Crohn's ileitis in the  
548 distal small intestine<sup>48-50</sup>. We note that NEC and ileitis most commonly affect domains D  
549 and E, which we found to be important sites of dietary fat response and metabolism,  
550 raising the intriguing possibility that lipid dynamics in these positions may modulate the  
551 local epithelial, immune, or microbial niche with relevance to these pathologies. This  
552 study provides a molecular roadmap that can be used to investigate the multifactorial  
553 interactions in specific cellular neighborhoods that may predispose specific regions to  
554 disease.

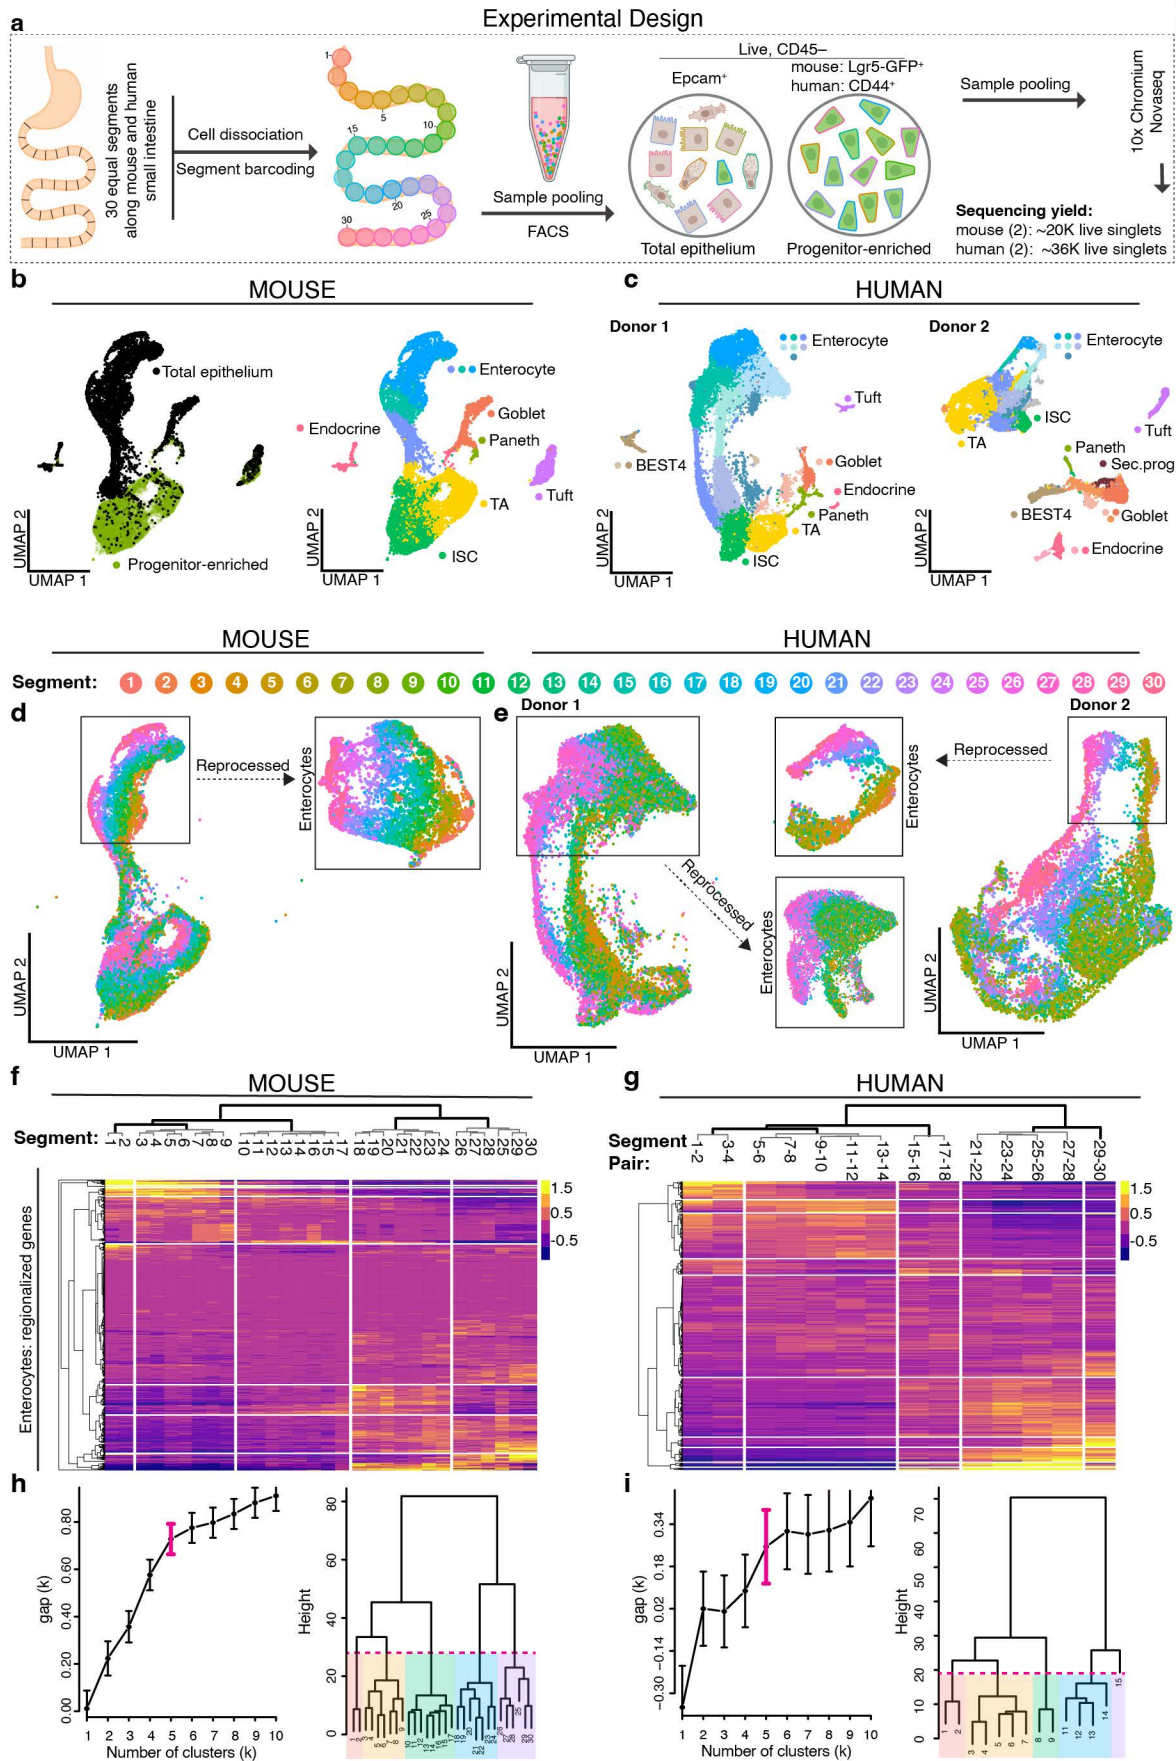



**Fig. 1. Five groups of enterocytes occupy distinct zones along the proximal to distal length of the mouse and human small intestine.** **a** Schematic of the strategy for scRNAseq of epithelial cells from 30 equal segments of the mouse ( $n = 2$ ) and human ( $n = 2$ ) small intestine. Cells from each segment were dissociated, tagged with segment-specific barcodes, pooled, sorted into total epithelial and progenitor-enriched samples, and sequenced. Cell number yields following data QC are shown. **b,c** UMAP of sequenced mouse and human cells following QC, annotated with total epithelial or progenitor-enriched sample identification (b, left) or predicted cell type. M-cells not displayed, c.f. Extended Data Fig. 5–7. **d,e** UMAP of absorptive lineage cells colored by segment number along the proximal to distal axis. Insets display reprocessed enterocyte subsets. Human donor 2 is used for subsequent main figure panels unless otherwise noted. **f,g** Average expression of the top 150 upregulated genes in mouse and human enterocytes in each segment, with segment order and hierarchical clustering based on expression distance between segments. Vertical white lines show the five domains that divide the small intestine, based on: **h,i left**: gap statistics for hierarchical clusters of enterocytes in regional gene expression distance. *Right*: Cuts of dendrograms with optimal cluster numbers (magenta brackets, left), with the branches and segment numbers of five resulting regional enterocyte groups shaded. UMAP: Uniform Manifold Approximation and Projection.



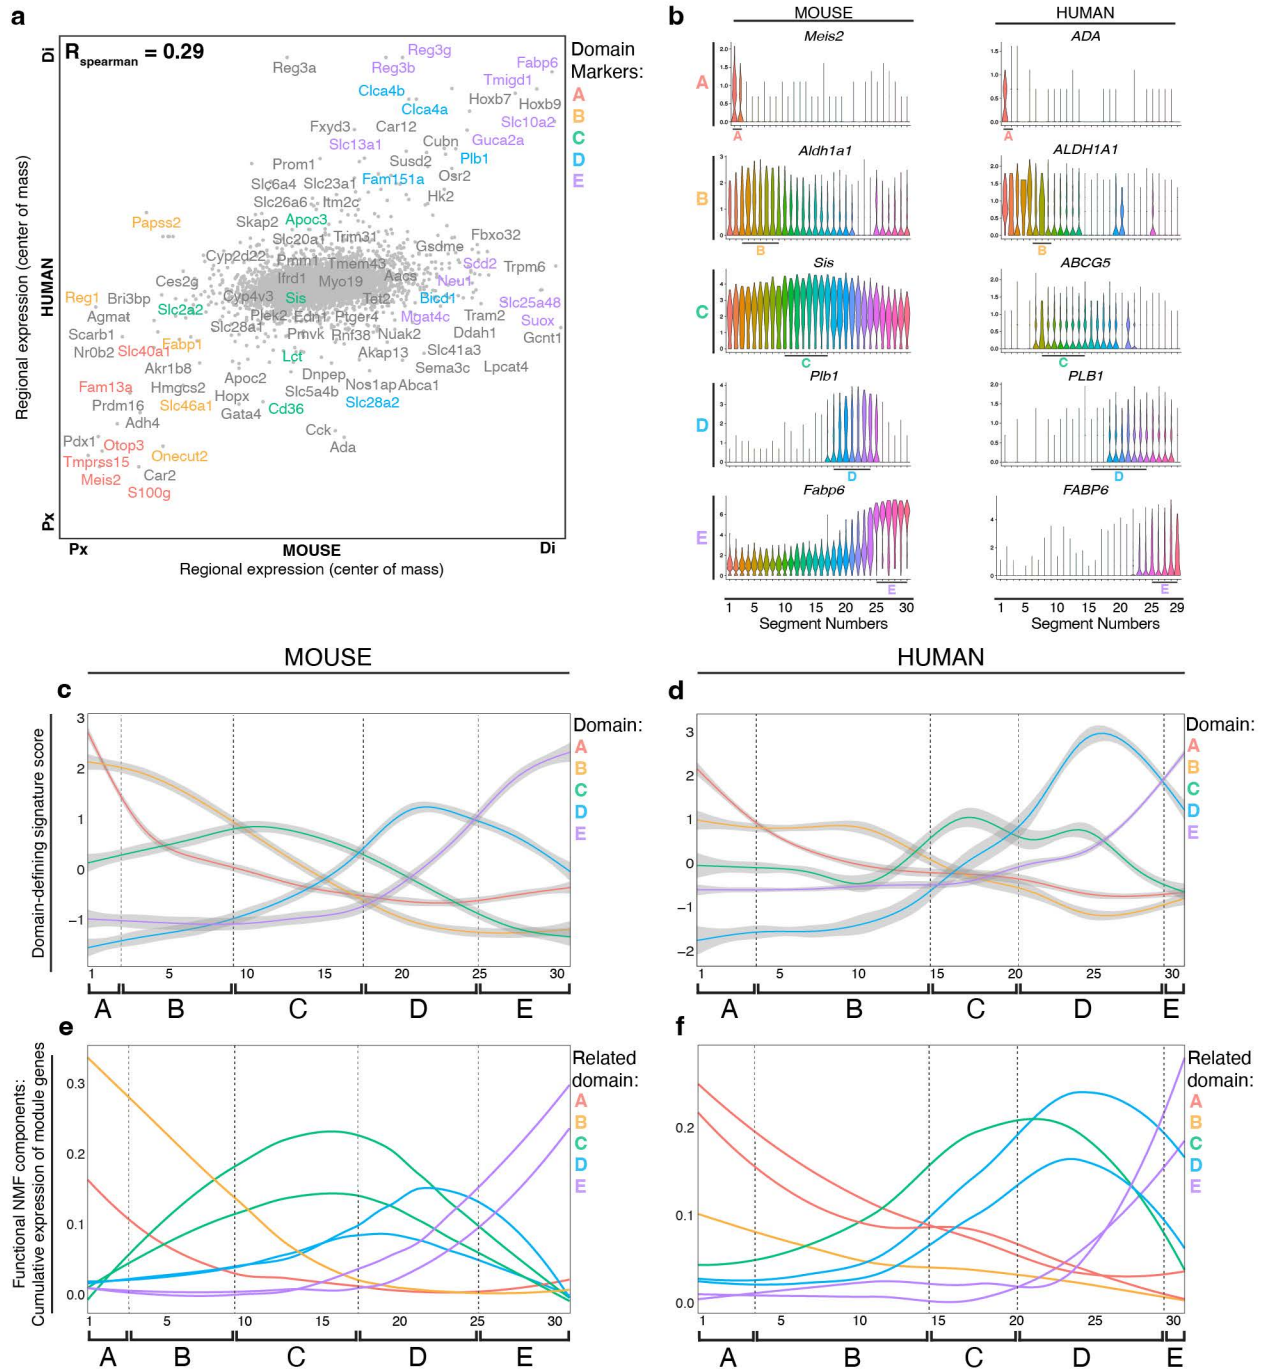

**Fig 2. A progression of five distinct gene modules divides intestinal length.**

**a** Comparison of segment centers of mass for 6,191 homologous genes in mouse and human enterocytes with mean sum-normalized levels  $>1 \times 10^{-5}$  in at least one point along intestinal length in both species.  $R_{\text{Spearman}} = 0.29$ ,  $p = 2.7 \times 10^{-135}$ ,  $n = 2$  mice and 2 human donors. Top segmentally variable genes in each species are shown, of which mouse domain signature genes are color-coded as indicated. Px and Di identify the proximal and distal ends of the mouse (x-axis) and human (y-axis) small intestine. **b** Expression level by segment of select marker genes of each domain in mouse and human enterocytes. Human genes were domain-enriched in both donors, representative plots from donor 1 are shown. **c, d** Domain-defining gene expression scores for mouse (**c**) and human donor 2 (**d**), which represent the mean scaled expression of the top 20 domain-defining genes, colored by domain with surrounding grey standard error bounds, across intestinal segments. Segment positions are numbered (x-axis) and positions of domain boundaries calculated in Fig. 1h,i are noted with dotted lines and brackets. **e, f** Cumulative expression of regionally variable mouse (**e**) and human (**f**) NMF gene modules across intestinal segments. Gene modules that encode physiological functions associated with nutrient metabolism are displayed. Module lines colored according to the domain A–E they most closely resemble based on regional expression trajectory and signature gene expression. Segment positions are numbered (x-axis) and positions of domain boundaries calculated in Fig. 1h,i are noted with dotted lines and brackets. NMF non-negative matrix factorization.

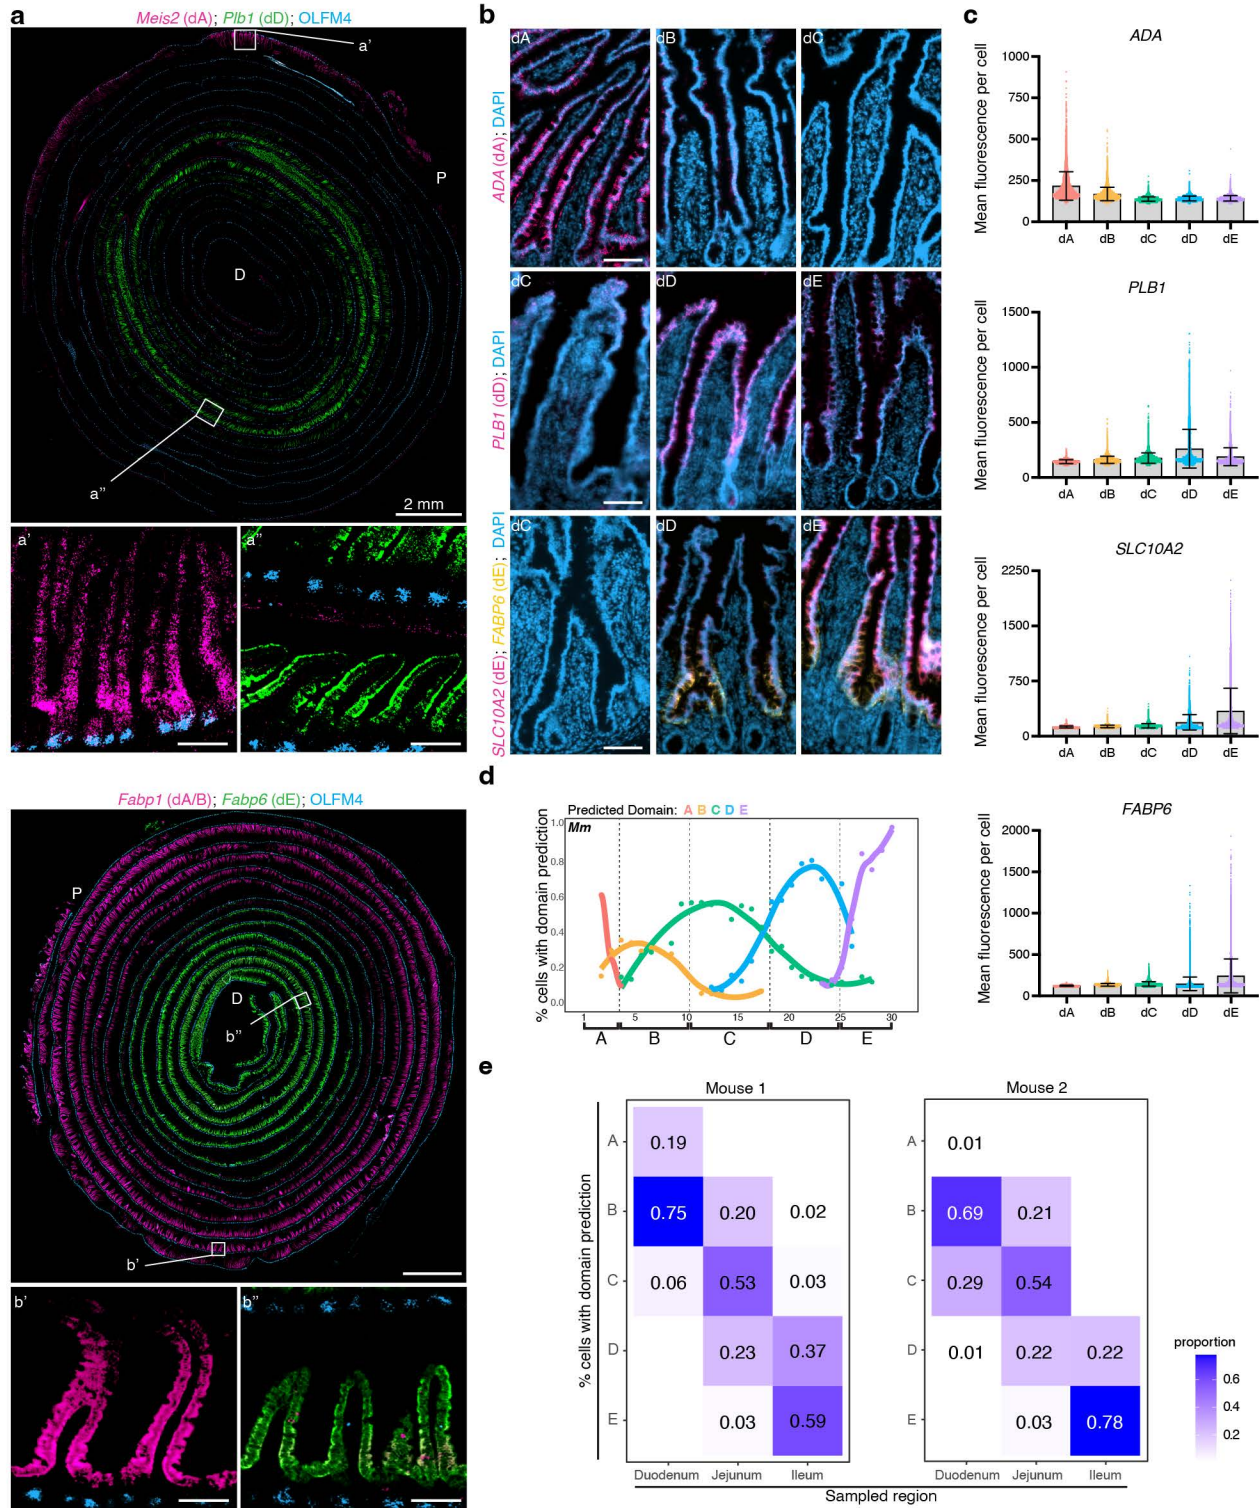

**Fig. 3. Domain identity can be detected across samples and used for systematic classification of intestinal regions.** **a** Full-length murine intestinal tissue coiled from the proximal (outside) end to the distal (inside) end, probed with single-molecule ISH for select marker genes of domains as indicated. White boxes indicate insets. Scale bars are 2 mm, and 100  $\mu$ m for insets. **b,c** images (**b**) of human tissue sections from indicated domains probed using single-molecule multiplexed ISH with indicated domain marker genes and quantification (**c**) of mean fluorescence per cell across 3-5 images per domain. Representative images and quantification from donor one are shown,  $n = 3$  or 4 donors per domain. Scale bars are 100  $\mu$ m. **d,e** Predicted domain identities of (**d**) enterocytes sequenced in mouse sequencing set two (test dataset,  $n = 2$  mice) and (**e**) cells previously sequenced from two mice in published data<sup>2</sup>, as assigned by computational transfer of domain labels from the mouse dataset trained with known domain assignments (training dataset). In **d**, proportion of cells with the domain predictions at each segment position (x-axis) indicated by line color and dotted vertical lines indicate domain boundaries in training set in Fig. 1f,h. In **e**, proportion of cells in the reported classic intestinal regions are as indicated in each column. **d** Domain, *Mm* mouse.



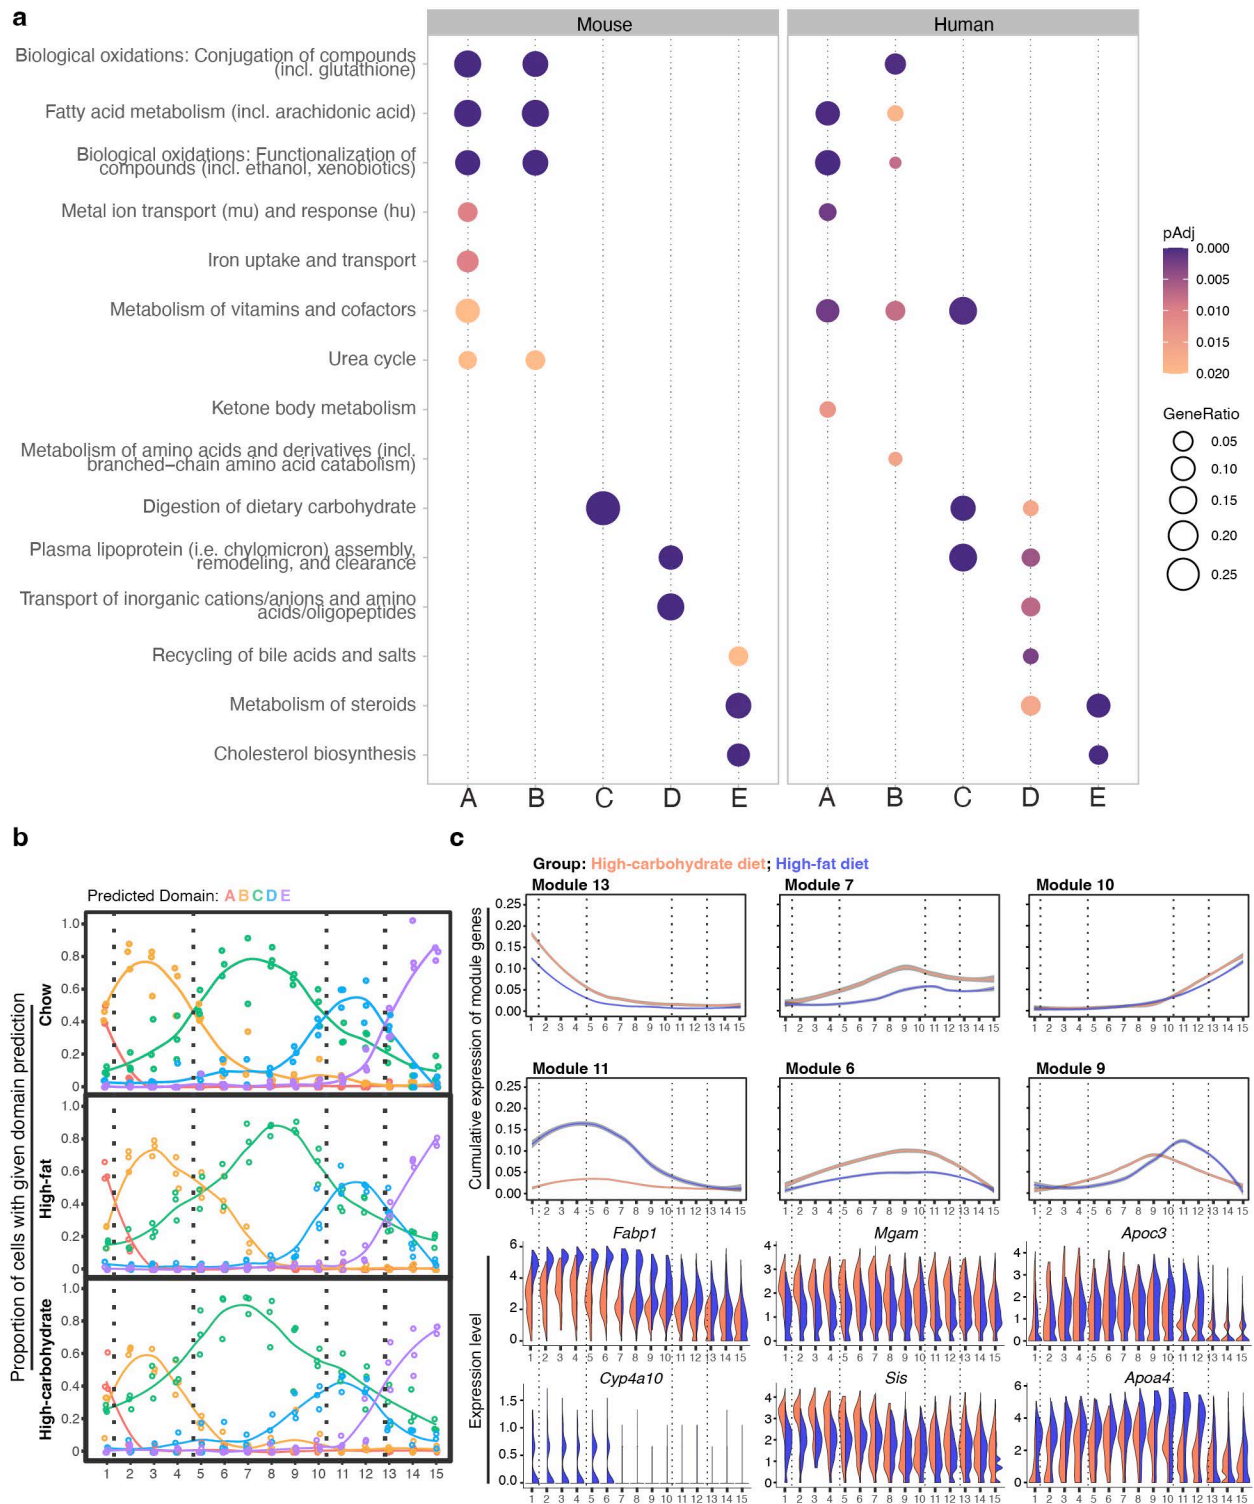

**Fig. 4. Domains are associated with distinct aspects of nutrient metabolism.** **a** Summary of pathway enrichment in each mouse and human domain, represented as circles colored according to adjusted p-value and sized according to gene ratio (ratio of domain marker genes that are annotated with the pathway term). Selected domain-enriched, nutrient metabolism-associated pathways with adjusted  $p < 0.02$  are shown. **b** Predicted domain identities of sequenced enterocytes from mice administered a high-fat or high-carbohydrate diet for 7 days ( $n = 3$  mice per diet group), as assigned by computational transfer of domain labels from the mouse training dataset. Proportion of cells with the domain predictions in 3 mice per diet group indicated by color of best fit lines; dots indicate datapoints from each mouse. Dotted vertical lines indicate domain boundary positions predicted for chow diet group (top). **c** Cumulative expression of regionally variable NMF gene modules associated with nutrient metabolism across intestinal segments in each diet group, indicated by line color. **d** Expression level of select genes from the indicated modules associated with lipid metabolism (modules 11 and 9) and carbohydrate absorption (module 6) in mice fed high-fat (purple) or high-carbohydrate (orange) diets. Mm mouse, NMF non-negative matrix factorization.

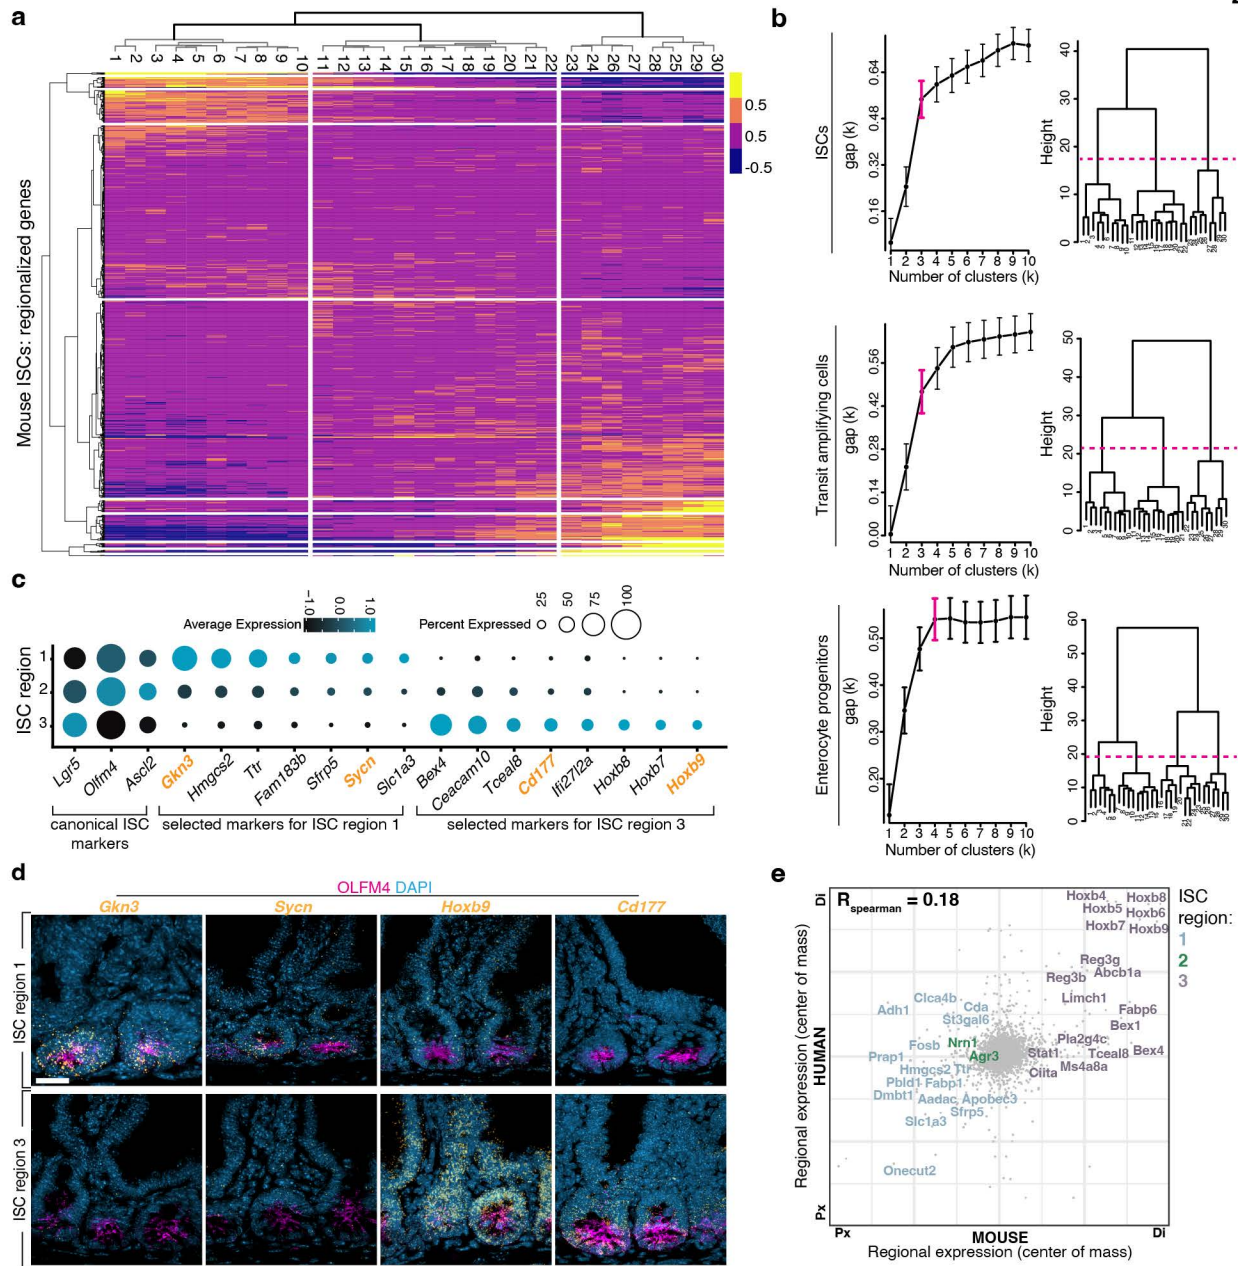

**Fig. 5. Three regional stem cell populations reside within the small intestine.** **a** Average expression of the top 100 upregulated genes in murine ISC in each segment, with segment order and hierarchical clustering based on expression distance between segments. Vertical white lines show the three domains that divide the ISC compartment, based on gap statistics. **b** Left: gap statistics for clusters of regional gene expression in regional ISCs, transit amplifying cells, and enterocyte progenitors. Right: cuts of dendrograms (dotted magenta lines) with optimal cluster numbers (magenta brackets, left) for each cell type. **c** Selected regional ISC subpopulation marker genes represented as dots colored according to average expression level and sized according to percent of ISCs expressing the marker. Bold orange marker labels were validated with ISH (Fig. 5d). **d** Intestinal crypts probed with single-molecule ISH for select regional ISC marker genes as indicated. Scale bars are 20  $\mu$ m. ISCs intestinal stem cells. **e** Comparison of segment centers of mass for 7,668 homologous genes in mouse and human crypt cells with mean sum-normalized levels  $>1 \times 10^{-5}$  in at least one point along intestinal length in both species.  $R_{\text{spearman}} = 0.18$ ,  $p = 6.74 \times 10^{-55}$ ,  $n = 2$  mice and 2 human donors. Top segmentally variable genes in each species are shown, of which mouse regional ISC signature genes are color-coded as indicated. Px and Di identify the proximal and distal ends of the mouse (x-axis) and human (y-axis) small intestine.

Figure 6  
Zwick et al.

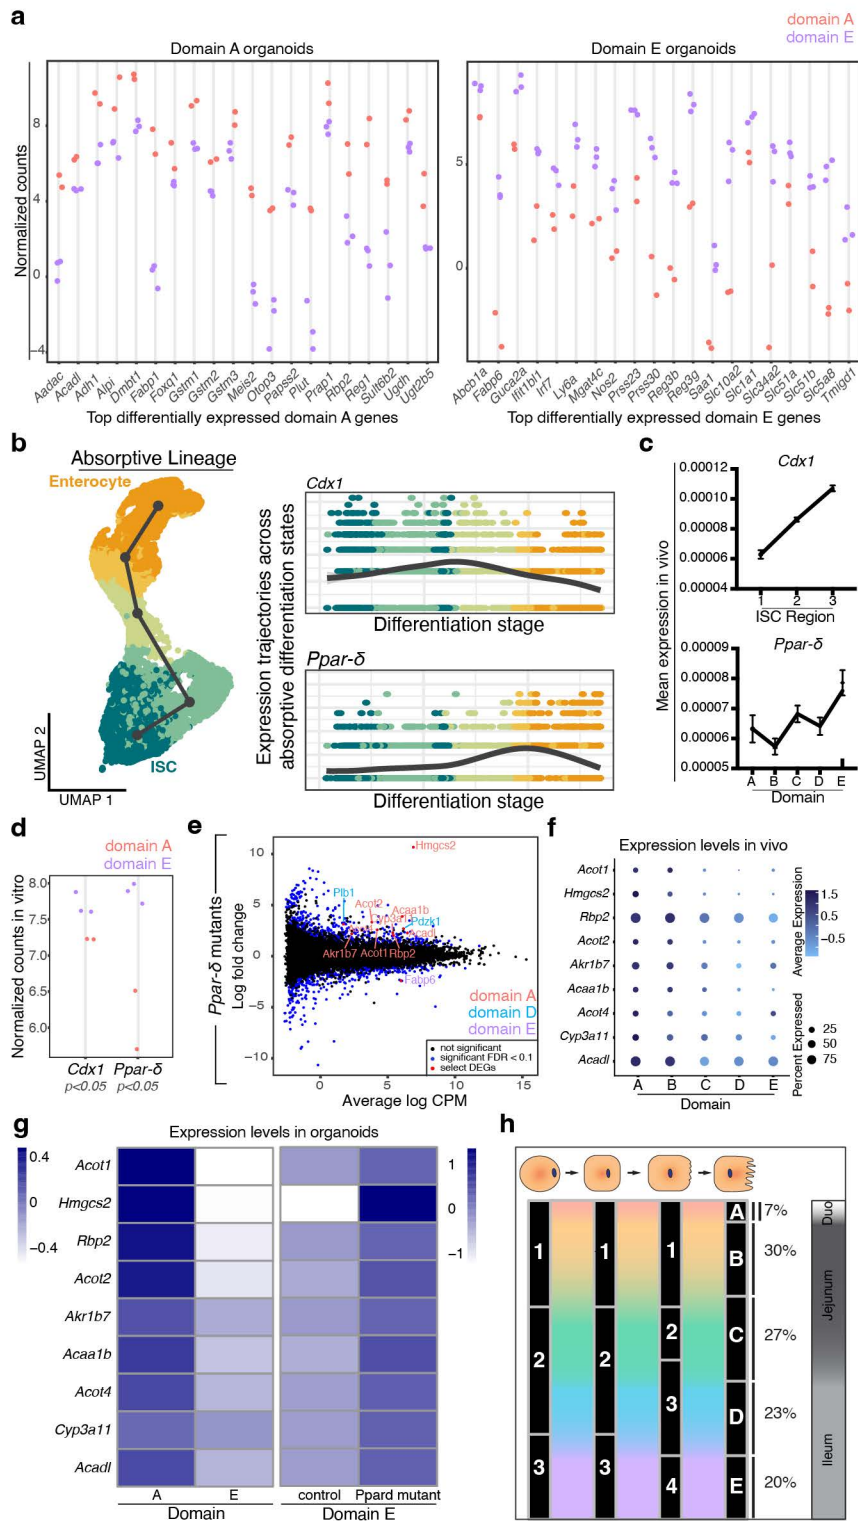



**Fig. 6. Transcriptional control of enterocyte regional identity.** **a** mRNA levels of the top 20 domain A (left) and domain E (right) signature genes most highly differentially expressed in domain A or E-derived organoids, respectively, 5–6 days after passaging in long-term (> 5 week) culture, evaluated with mRNAseq. n = 2 dA organoid lines and 3 dE organoid lines. **b** UMAP of all murine absorptive lineage cells (left) and expression trajectories of *Cdx1* and *Ppar- $\delta$*  (right), colored according to inferred differentiation stage. Transcription factor expression trajectories were plotted for cells in domain E. **c** Expression profiles of *Ppar- $\delta$*  in enterocytes across domains and *Cdx1* in crypts across ISC regions. Data are mean expression levels of cells in indicated positions from mouse scRNAseq data, +/- standard errors of means,  $q < 0.01$  for both genes. **d** mRNA levels of *Cdx1* and *Ppar- $\delta$*  in domain A or E-derived organoids, as in a. **e** Mean-difference plots of expression in *Ppar- $\delta$*  mutant organoids relative to controls. Dot colors specified in key. Regionally variable DEGs that encode lipid metabolism are labeled and colored by domain as indicated. n = 3 unique *Ppar- $\delta$*  mutant organoid lines and 2 control lines. **f** Dotplot of *in vivo* expression levels (analyzed in scRNAseq data) of identified DEGs in *Ppar- $\delta$*  knock out organoids. Dot size represents percent expressing enterocytes, color intensity represents average expression levels. **g** Heatmap showing mRNA levels of domain A lipid metabolism signature in domain A- and E-derived organoids as in a, and in control and *Ppar- $\delta$*  knock out domain E organoids as in e. **h** Summary of conclusions and model for regional specialization of the small intestine. Within the absorptive lineage (schematized, top), we find that ISCs occur in 3 regional populations, which likely give rise to 3 transit amplifying cell populations, which produce 4 enterocyte progenitors that ultimately specialize into 5 distinct mature enterocyte types that occupy absorption domains A–E. The estimated proportion of intestinal length of each domain and our approximation of corresponding traditional intestinal regions are shown.

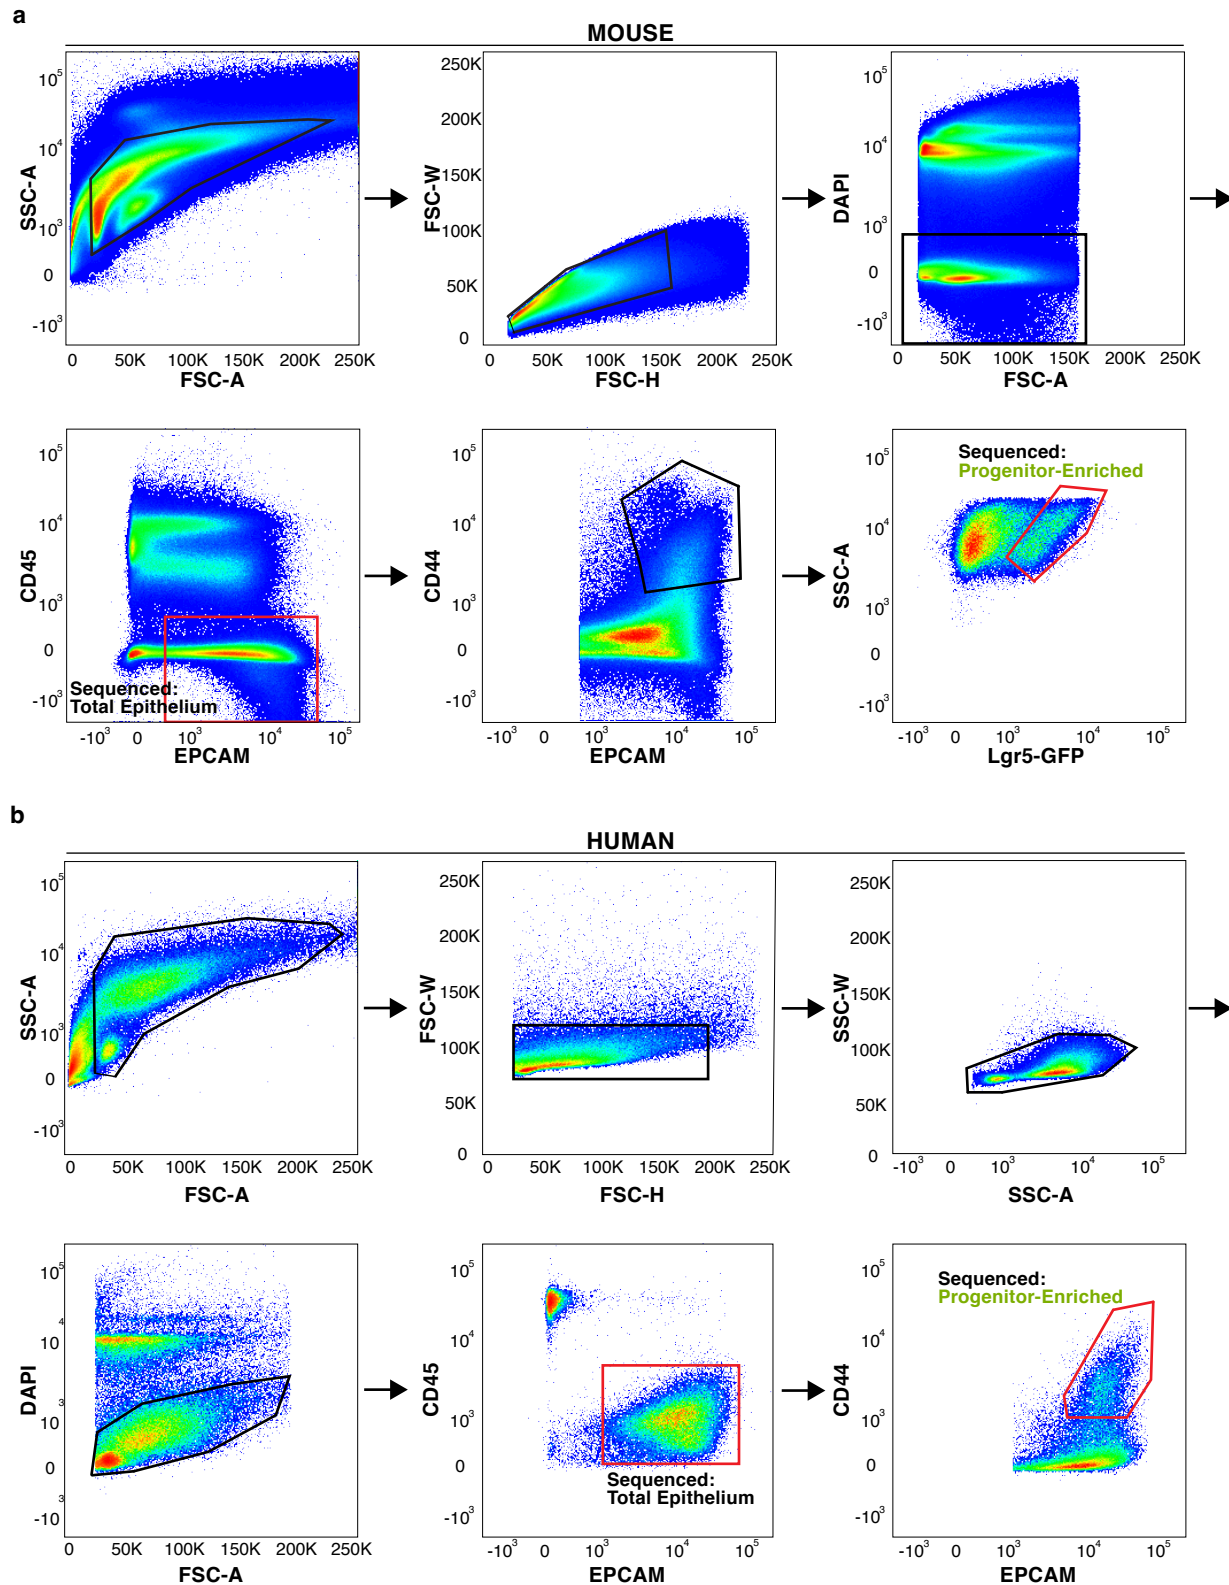

**Extended Data Fig. 1.** Strategy for isolation of murine and human epithelial cells for single cell RNA sequencing (scRNAseq). **a,b** Representative flow cytometry plots of sequential gating strategy for single, live (a) murine total epithelial (CD45<sup>-</sup>, EPCAM<sup>+</sup>) and progenitor-enriched (CD45<sup>-</sup>, EPCAM<sup>++</sup>, CD44<sup>++</sup>, Lgr5-GFP<sup>+</sup>) cells and (b) human total epithelial (CD45<sup>-</sup>, EPCAM<sup>+</sup>) and progenitor-enriched (CD45<sup>-</sup>, EPCAM<sup>+</sup>, CD44<sup>+</sup>) cells. CD45<sup>+</sup> tuft cells were not captured in this study. FSC, forward scatter; SSC, side scatter.



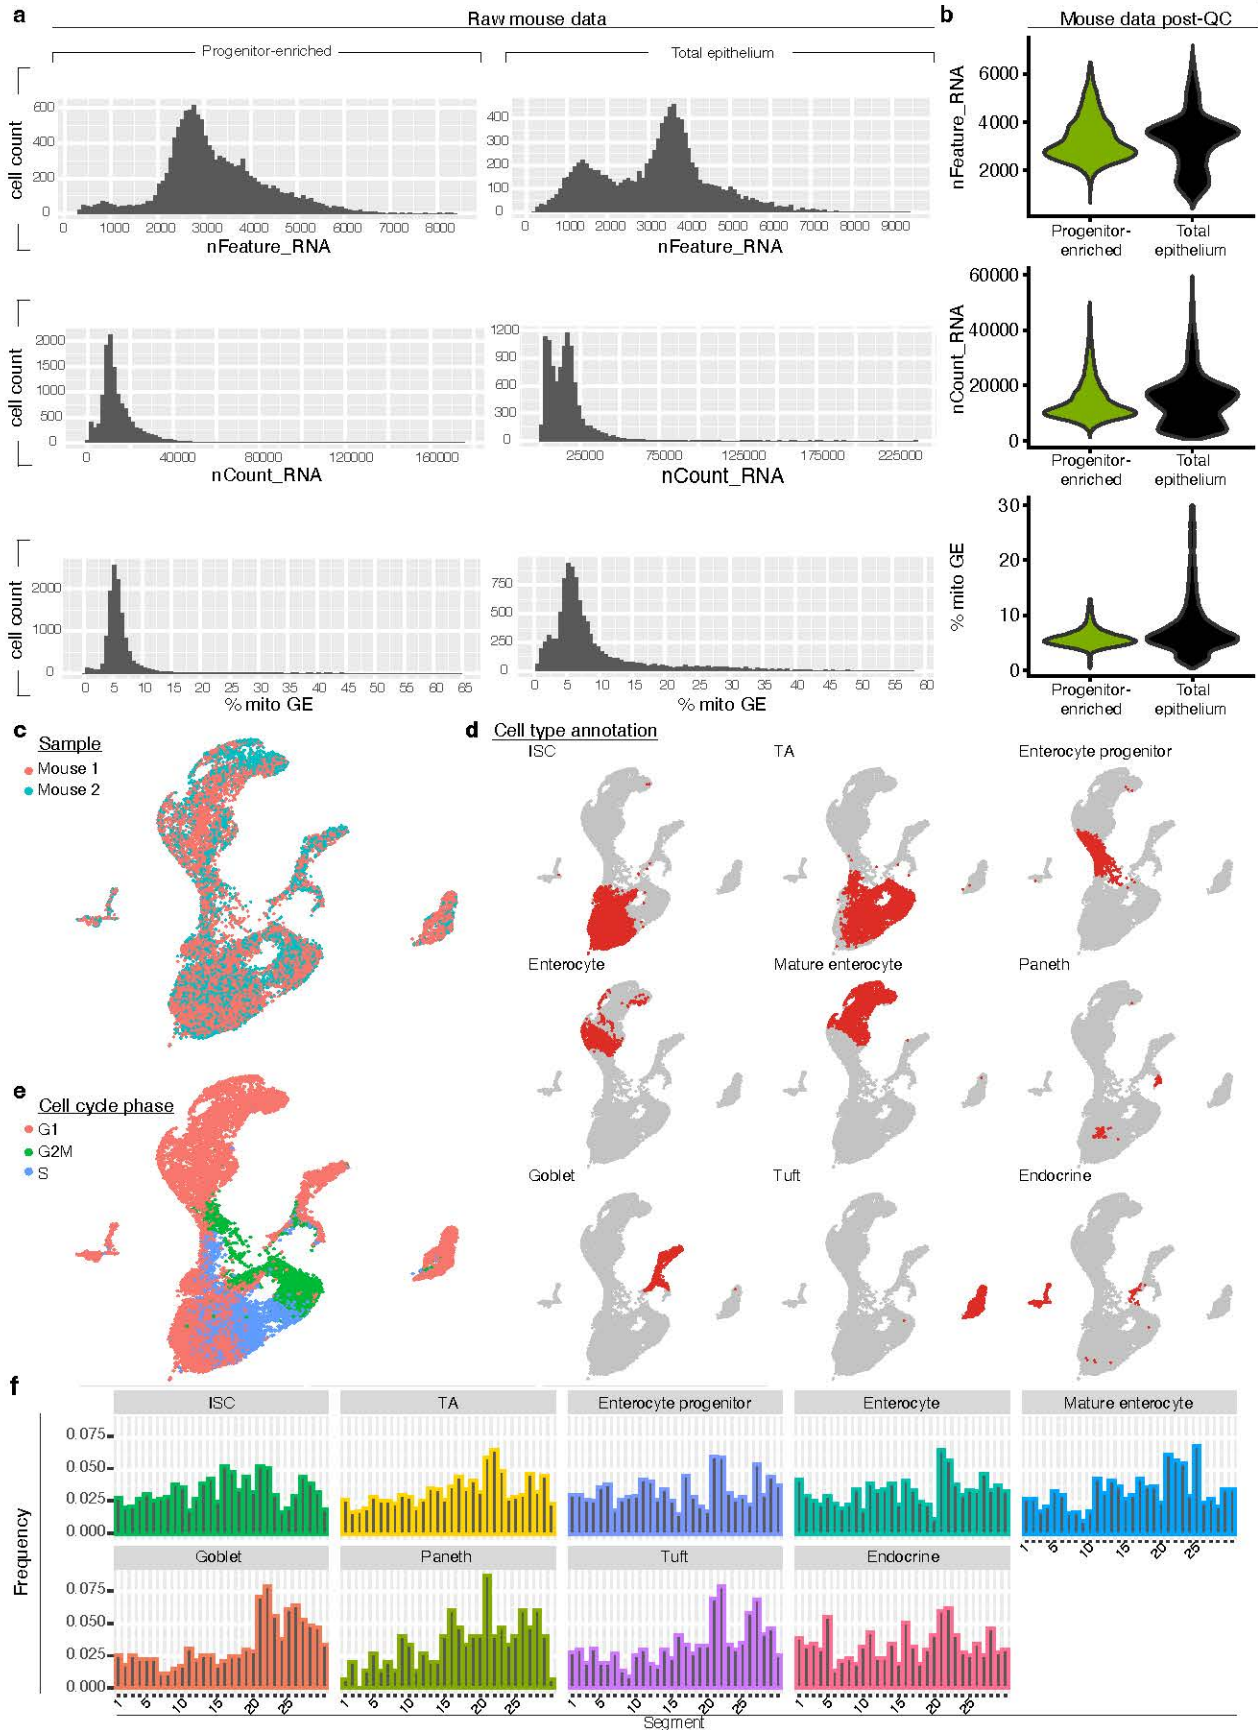

**Extended Data Fig. 2.** Quality control and initial processing of mouse scRNAseq data. **a,b** Quality control metrics of data, including number of genes detected ('nFeature\_RNA'), number of unique molecular identifiers detected ('nCount\_RNA'), and percent mitochondrial reads ('% mito GE) before (a) and after (b) processing data. **c-e** Uniform Manifold Approximation and Projection for Dimension Reduction (UMAP) of total murine epithelial cells sequenced post-QC, colored according to mouse identity (**c**), cell type annotation (**d**), or cell cycle phase (**e**). **f** Frequency of epithelial cells of indicated subtype by segment. QC, quality control, mito, mitochondrial; GE, gene expression; ISC, intestinal stem cell; TA, transit amplifying; G1, growth 1; G2M, growth 2 mitosis; S, synthesis.

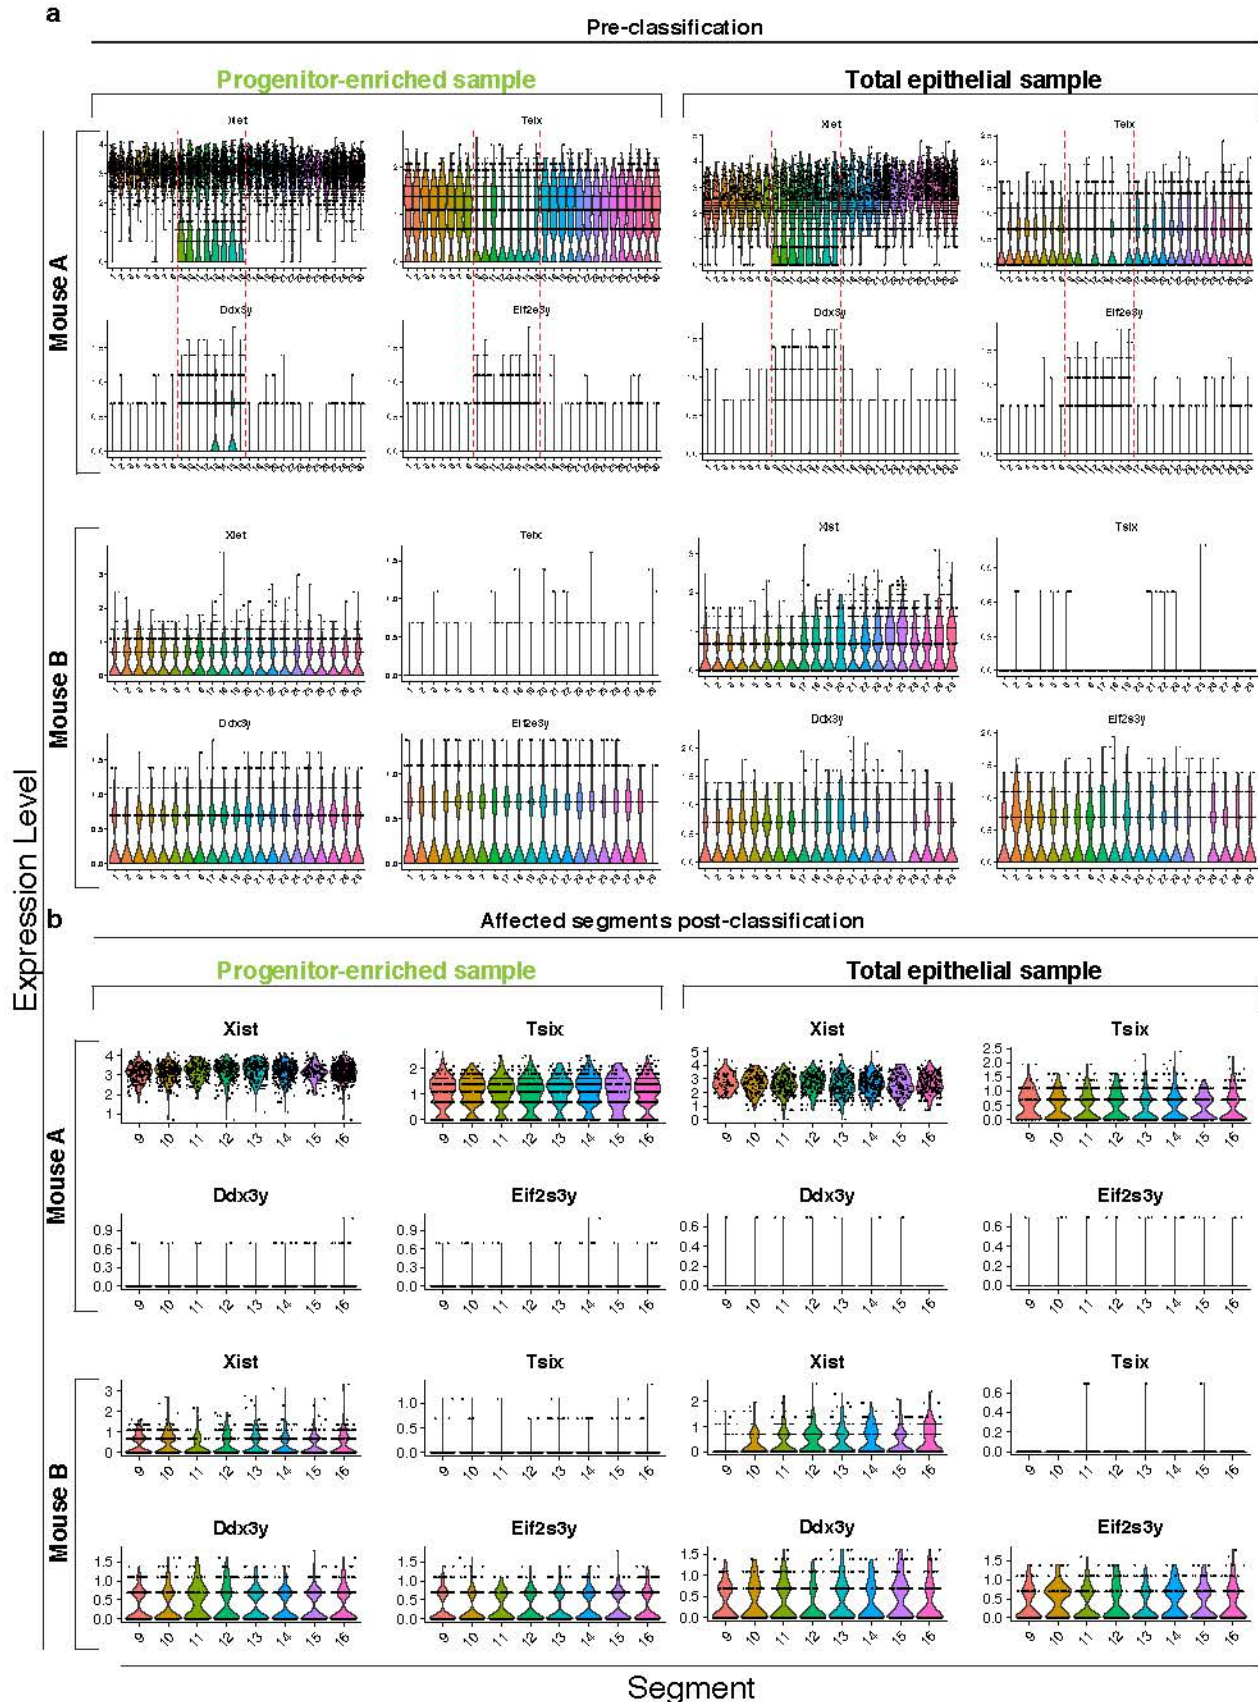

**Extended Data Fig. 3.** Classification of murine cells with mouse identity. **a** Expression of sex-linked genes in progenitor-enriched (left) and total epithelial (right) cells from each mouse prior to classification. A mix of male and female-linked genes were evident in segments 9-16. **b** Expression of sex-linked genes in progenitor-enriched (left) and total epithelial murine (right) cells from each mouse after training classifier to assign cells from all segments to male, female, or unassigned, and associate them with the appropriate segment positions in mouse 'A' or 'B'. Classification and reassignment of cells resulted in exclusive expression of either female or male-linked genes in Mouse A and Mouse B, respectively.



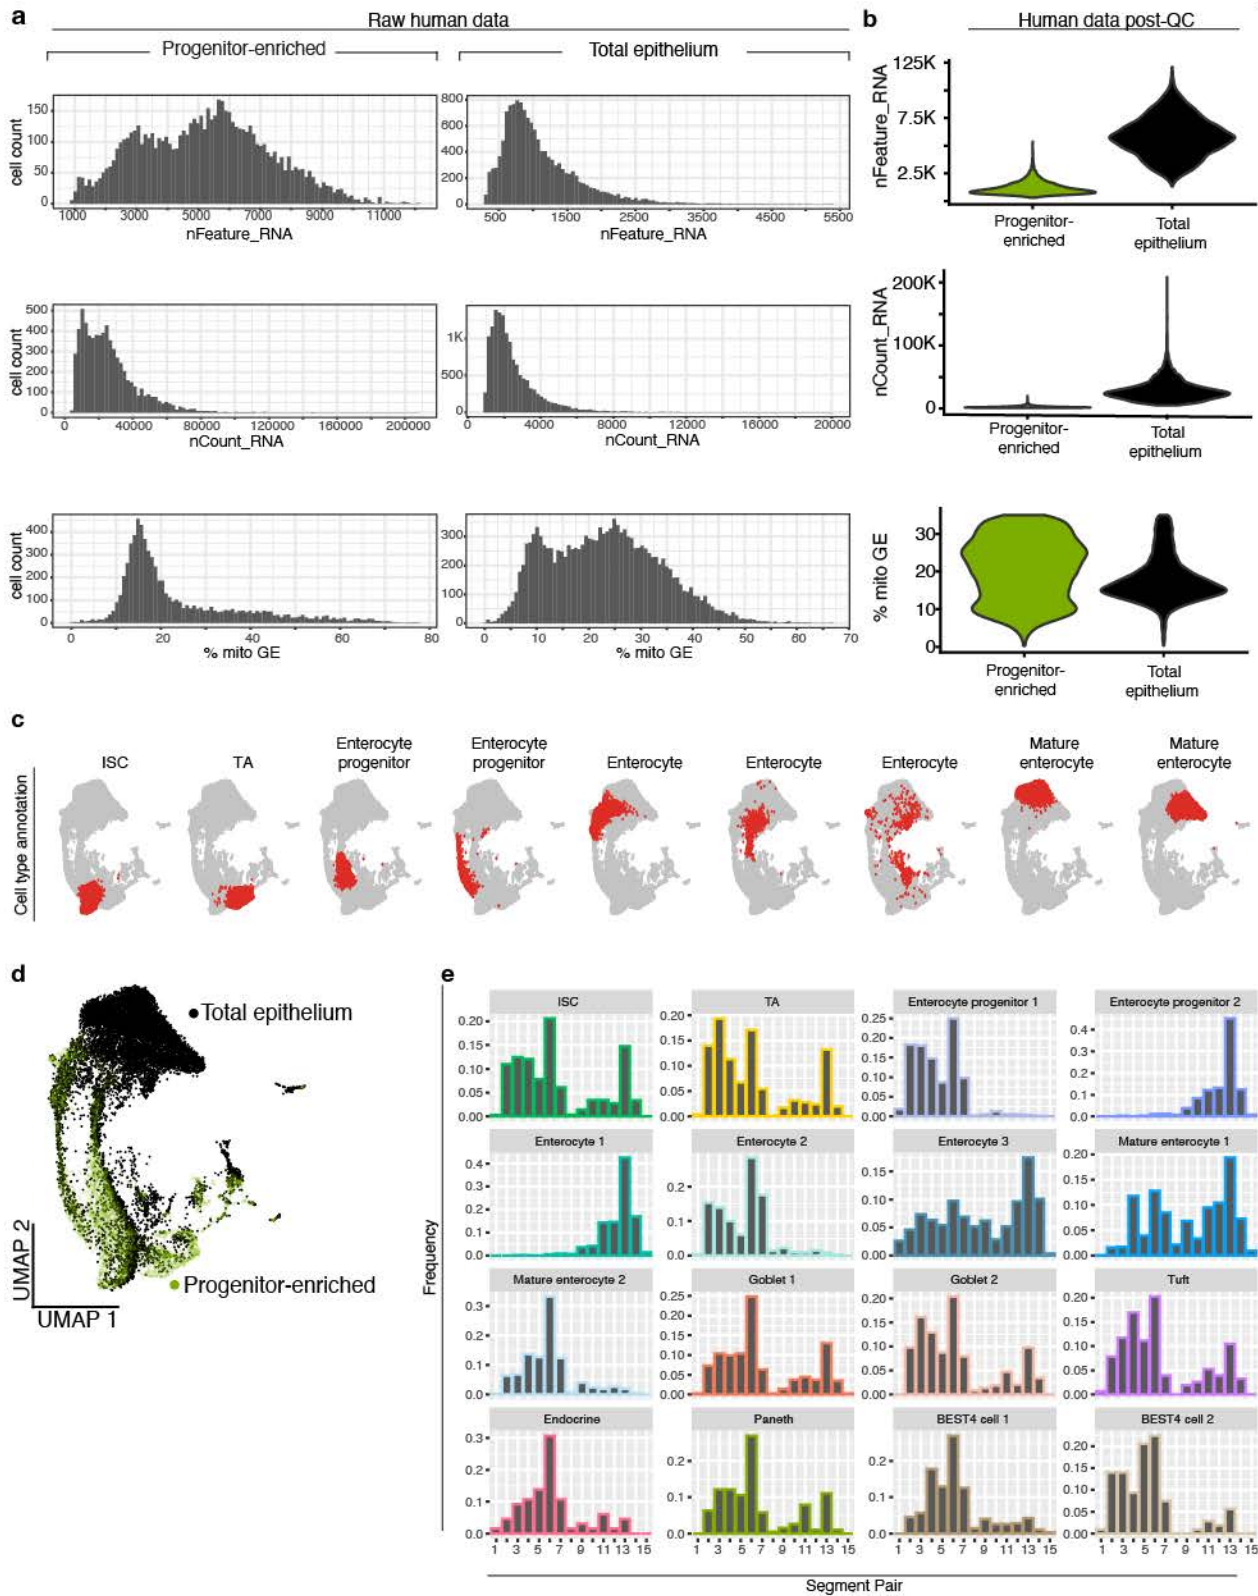

**Extended Data Fig. 4.** Quality control and initial processing of human scRNAseq data from human subject 1. **a,b** Quality control metrics of data, including number of genes detected ('nFeature\_RNA'), number of unique molecular identifiers detected ('nCount\_RNA'), and percent mitochondrial reads ('% mito GE') before (**a**) and after (**b**) processing data. **c,d** Uniform Manifold Approximation and Projection for Dimension Reduction (UMAP) of total human cells sequenced post-QC, highlighting cell type annotation (**c**) and total epithelial or progenitor-enriched sample identification (**d**). **e** Frequency of cells of all epithelial subtypes by segment pair. QC, quality control, mito, mitochondrial; GE, gene expression; ISC, intestinal stem cell; TA, transit amplifying.

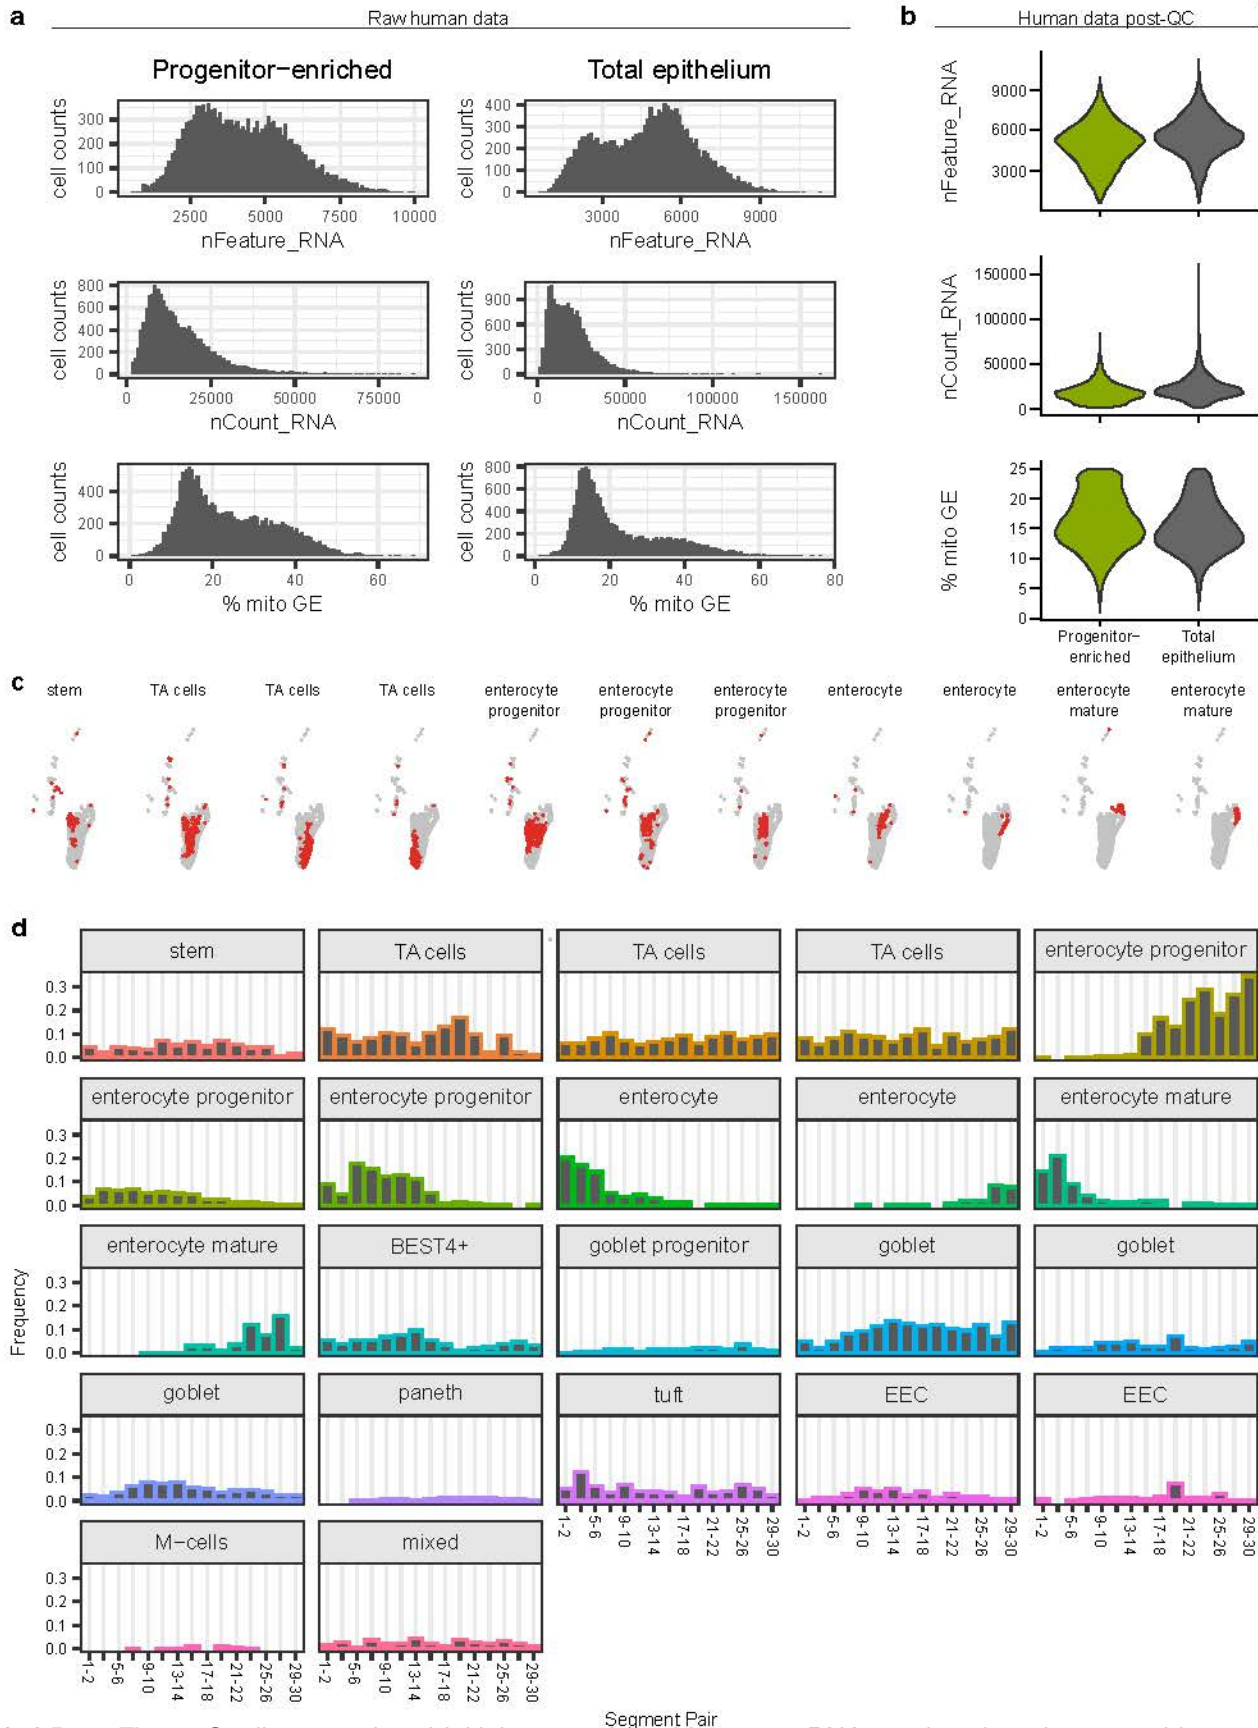

**Extended Data Fig. 5.** Quality control and initial processing of human scRNAseq data from human subject 2. **a,b** Quality control metrics of data, including number of genes detected ('nFeature\_RNA'), number of unique molecular identifiers detected ('nCount\_RNA'), and percent mitochondrial reads ('% mito GE') before (**a**) and after (**b**) processing data. **c** Uniform Manifold Approximation and Projection for Dimension Reduction (UMAP) of total human cells sequenced post-QC, highlighting cell type annotation. **d** Frequency of cells of all epithelial subtypes by segment pair. QC, quality control; mito, mitochondrial; GE, gene expression; ISC, intestinal stem cell; TA, transit amplifying.



**Mouse:**

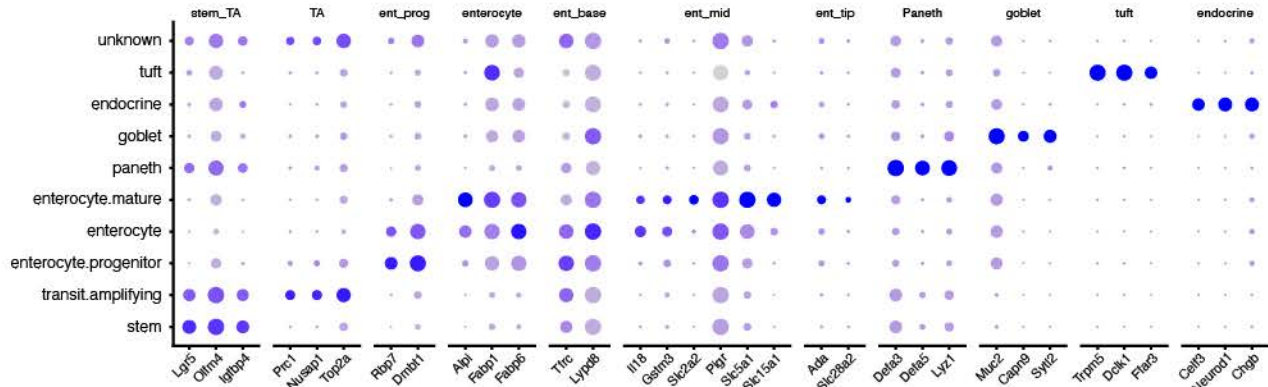

**Donor 1:**

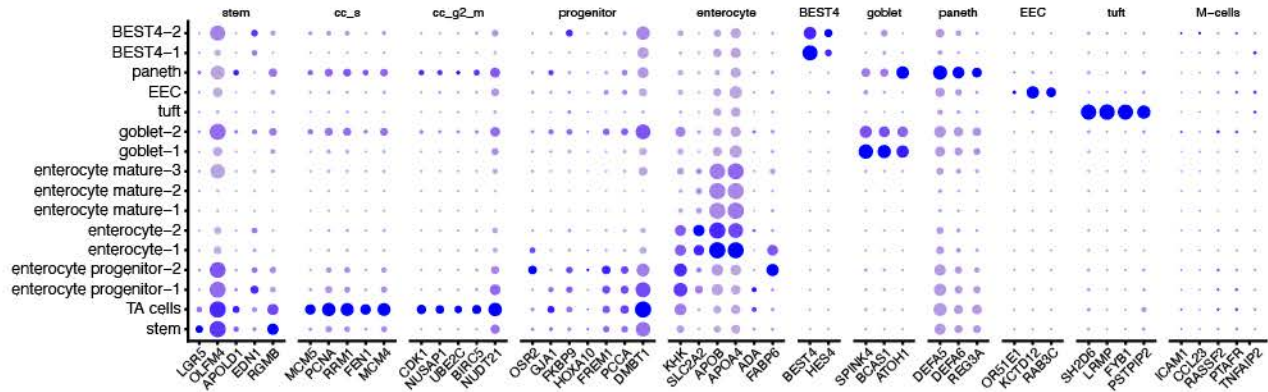

**Donor 2:**

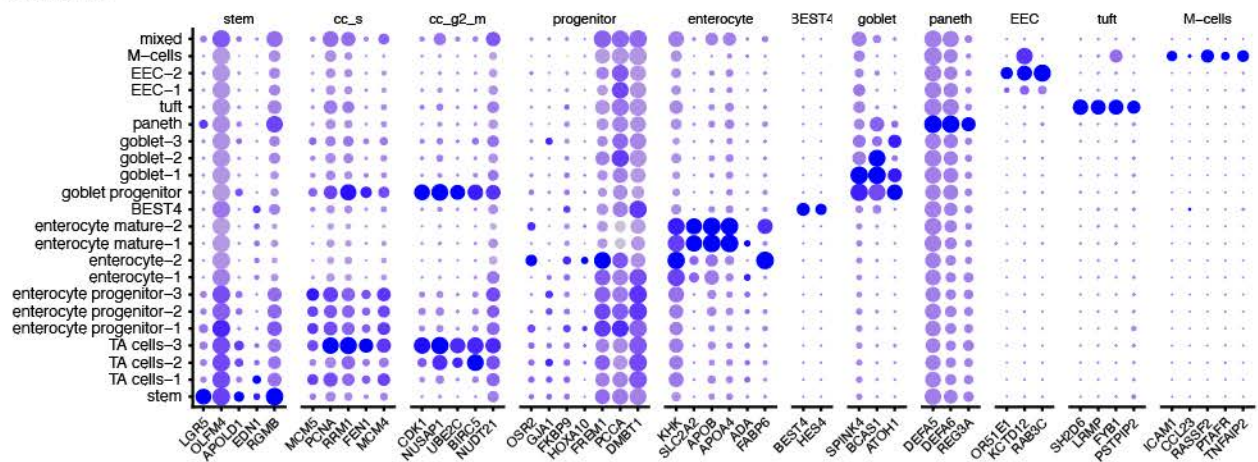

**Extended Data Fig. 6.** Mouse and human cell type marker genes. **a-c** Dotplots showing expression of cell type marker genes for each cell type sequenced from mouse (**a**) and human donors (**b and c**). See Methods for detailed description of cell type annotation procedures.

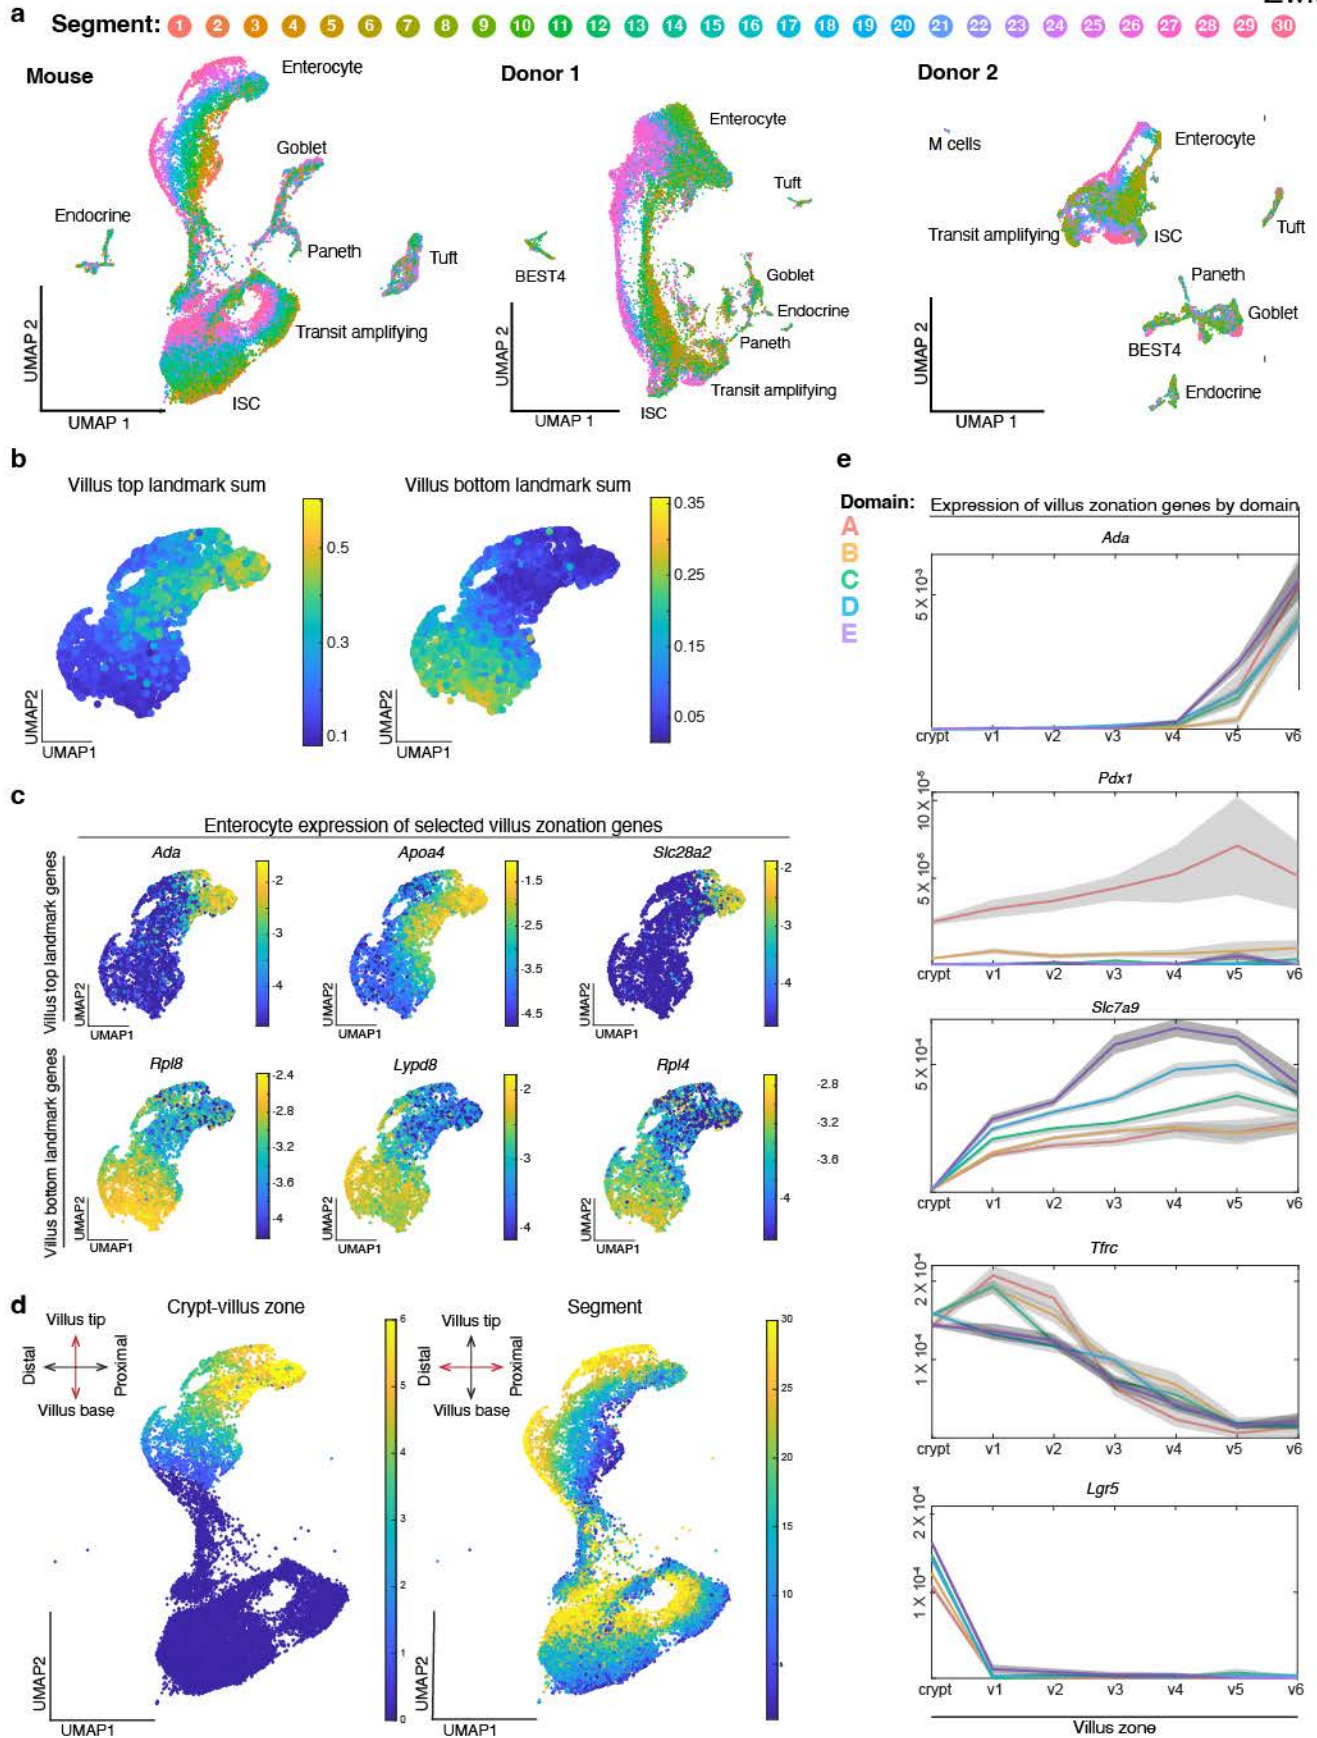



**Extended Data Fig. 7.** Zonation across multiple axes of the small intestine. **a** UMAP of absorptive lineage cells colored by segment number along the proximal to distal axis in mouse and human donors. Major epithelial cell types are labeled. **b-e** Villus zonation across murine enterocytes. **b** UMAP plots colored according to summed expression of previously reported <sup>14</sup> landmarks of the villus tip (left) or base of villus (right). An equal number of enterocytes were assigned to each of 6 crypt:villus zones, zones 1 - 6. **c** UMAP plots colored according to the expression of select top and bottom villus markers. **d** UMAP plots colored according to villus zonation scores (left) compared to segment positions (right). Villus zonation scores represent the ratio of the summed expression of bottom and top landmark genes. **e** Expression of select villus zonation markers, colored by domain with surrounding grey standard error bands, across crypt:villus zones. UMAP, Uniform Manifold Approximation and Projection.

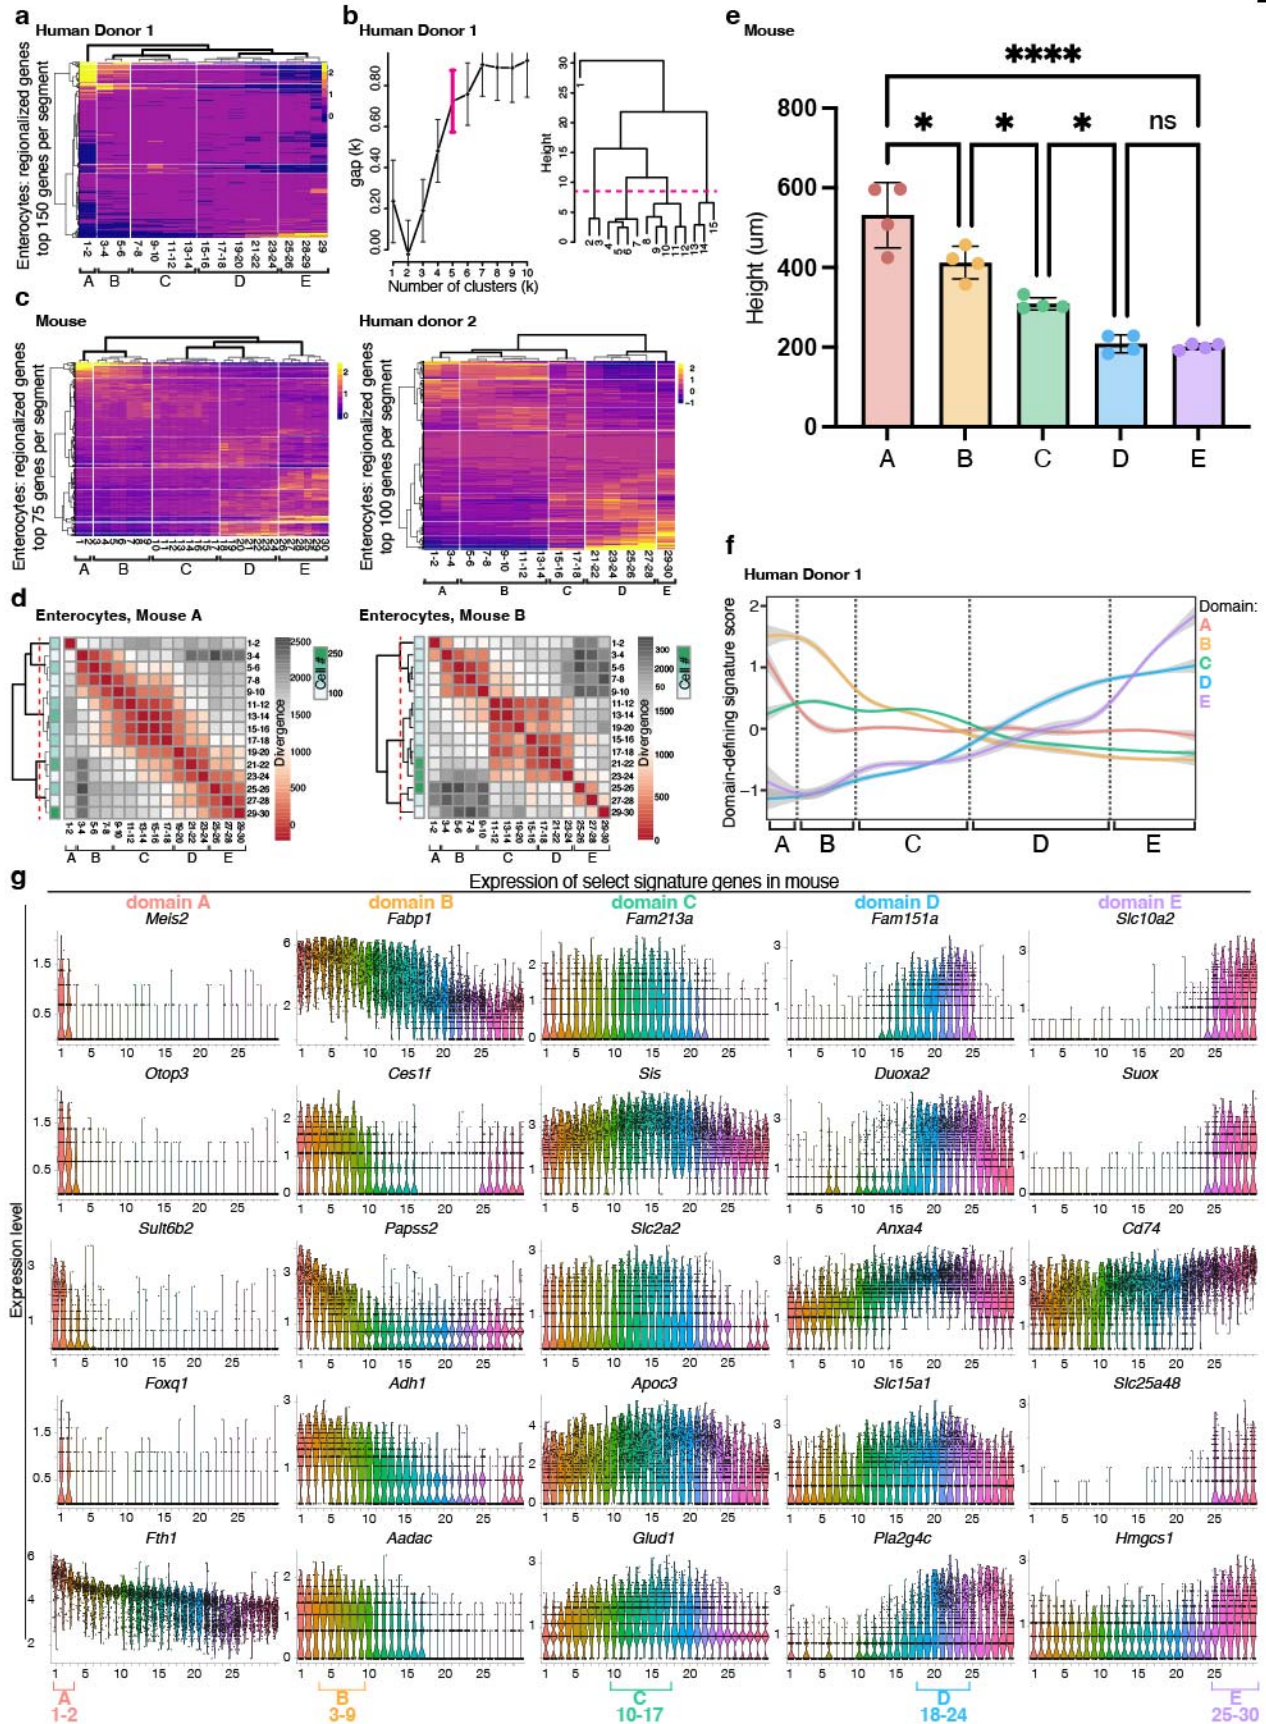

**Extended Data Fig. 8.** Stability and features of five domains across the mouse and human small intestine. **a** Average expression of the top 150 upregulated genes in enterocytes from human donor 1 in each segment, with segment order and hierarchical clustering based on expression distance between segments. Vertical white lines show the five domains that divide the small intestine, based on: **b left:** gap statistics for hierarchical clusters of enterocytes in regional gene expression distance. *Right:* Cuts of dendrogram with optimal cluster number (magenta bracket, left). **c** Most highly regionalized genes expressed by enterocytes in mouse and donor 2 as in Fig. 1f,g but with a smaller number of genes displayed (75-100), as indicated on the y-axis. **d** Jensen-Shannon Divergence between enterocytes from segment pairs across the intestine of each individual mouse, with segment pair order and hierarchical clustering based on divergence values between segments. **e** Average villus height by domain in mouse. Villus base to tip distances were measured for 3-5 villi in each segment, for each of 4 mice. Statistical significance was calculated using one-way ANOVA followed by Tukey's multiple comparisons test for villus heights across all segments in each domain. \* $P < 0.05$ , \*\*\*\* $P < 0.0001$ , ns not significant. **f** Domain-defining gene expression scores for human donor 1, as in Fig. 2c,d, colored by domain with surrounding grey standard error bounds, across intestinal segments. Positions of domain boundaries calculated in **b** are noted with dotted lines and brackets. **g** Expression of key domain marker genes in mouse enterocytes across segments. The segment positions of each domain designation are indicated (bottom).



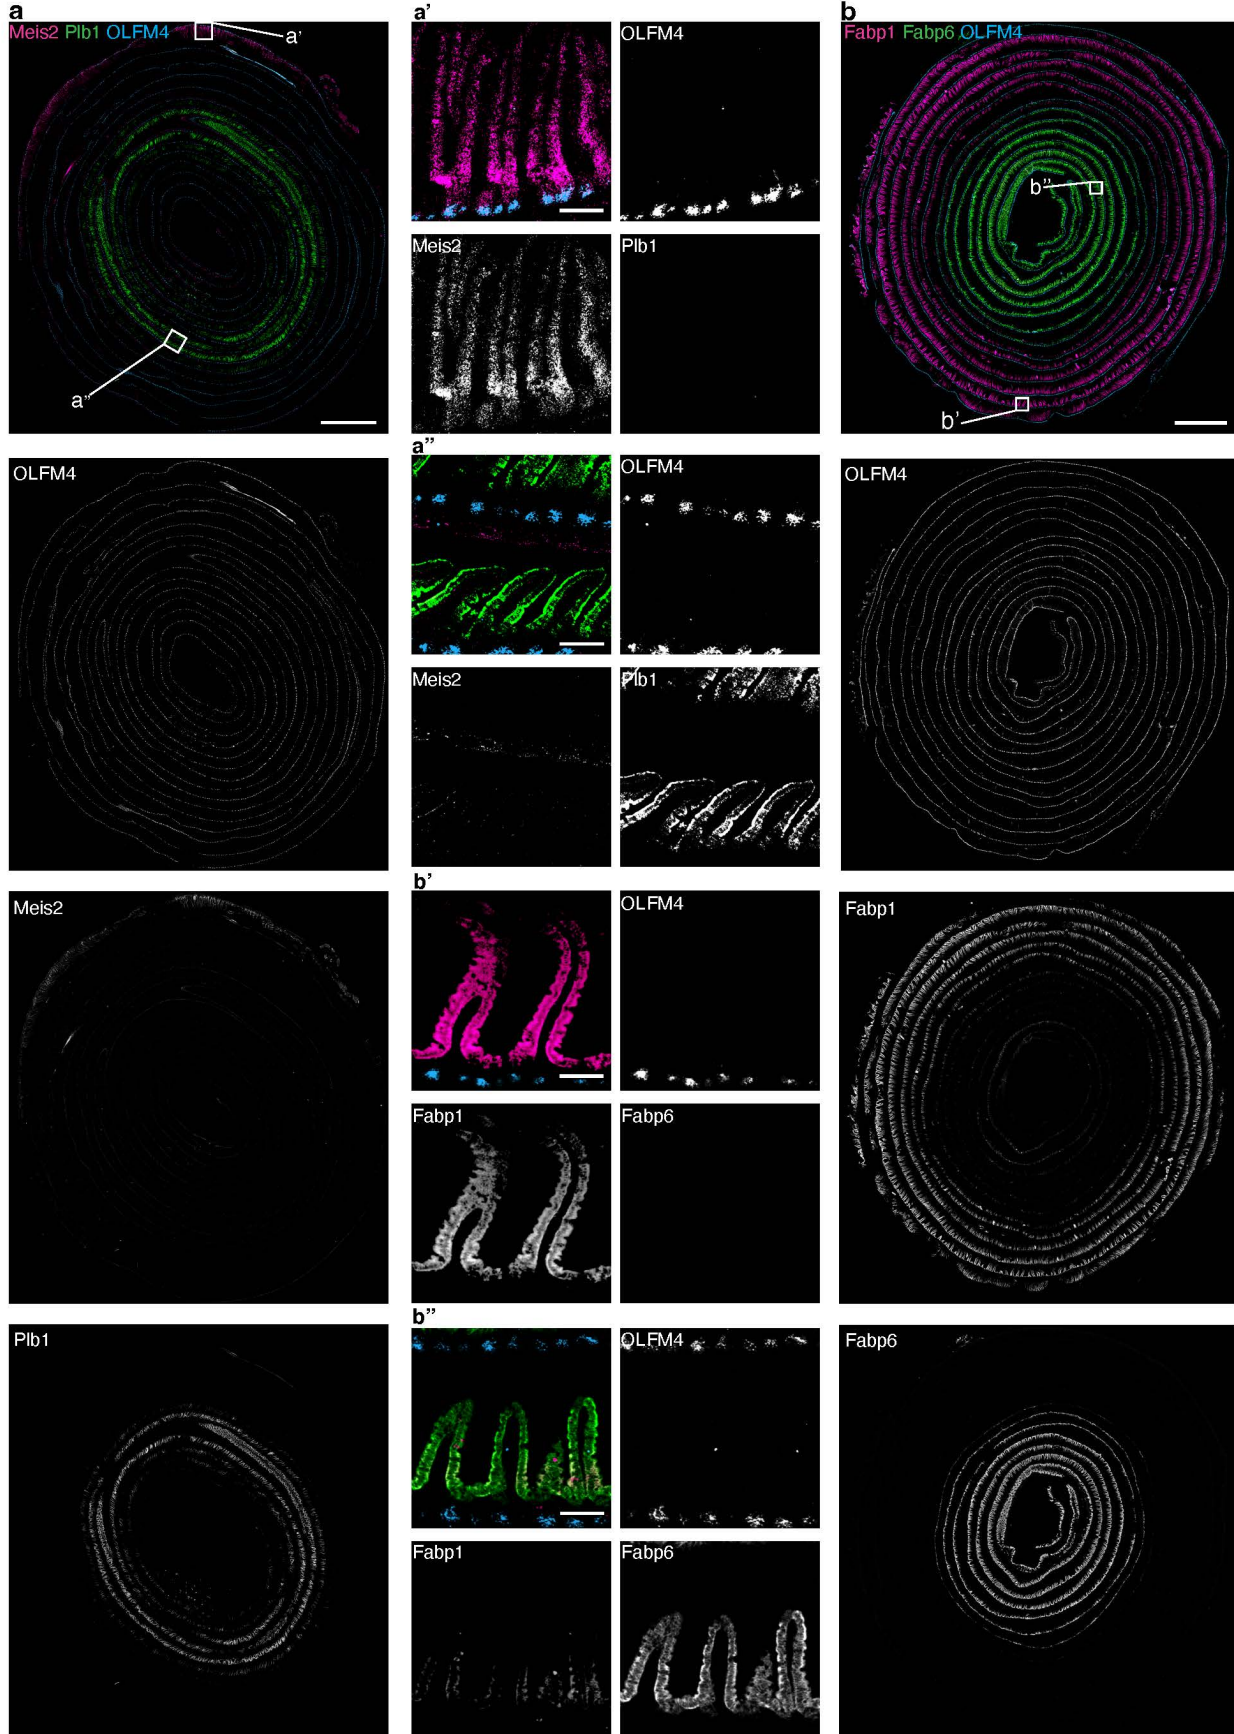

**Extended Data Fig. 9.** Single-molecule *in situ* hybridization (ISH) validation of key domain markers. **a,b** Full-length murine intestinal tissue coiled from the proximal (outside) end to the distal (inside) end, probed with single-molecule ISH for select marker genes of domains as indicated. Channels are shown both individually and merged with pseudocoloring (as in Fig. 2b,c). White boxes indicate insets. Scale bars are 2 mm, and 100  $\mu$ m for insets.

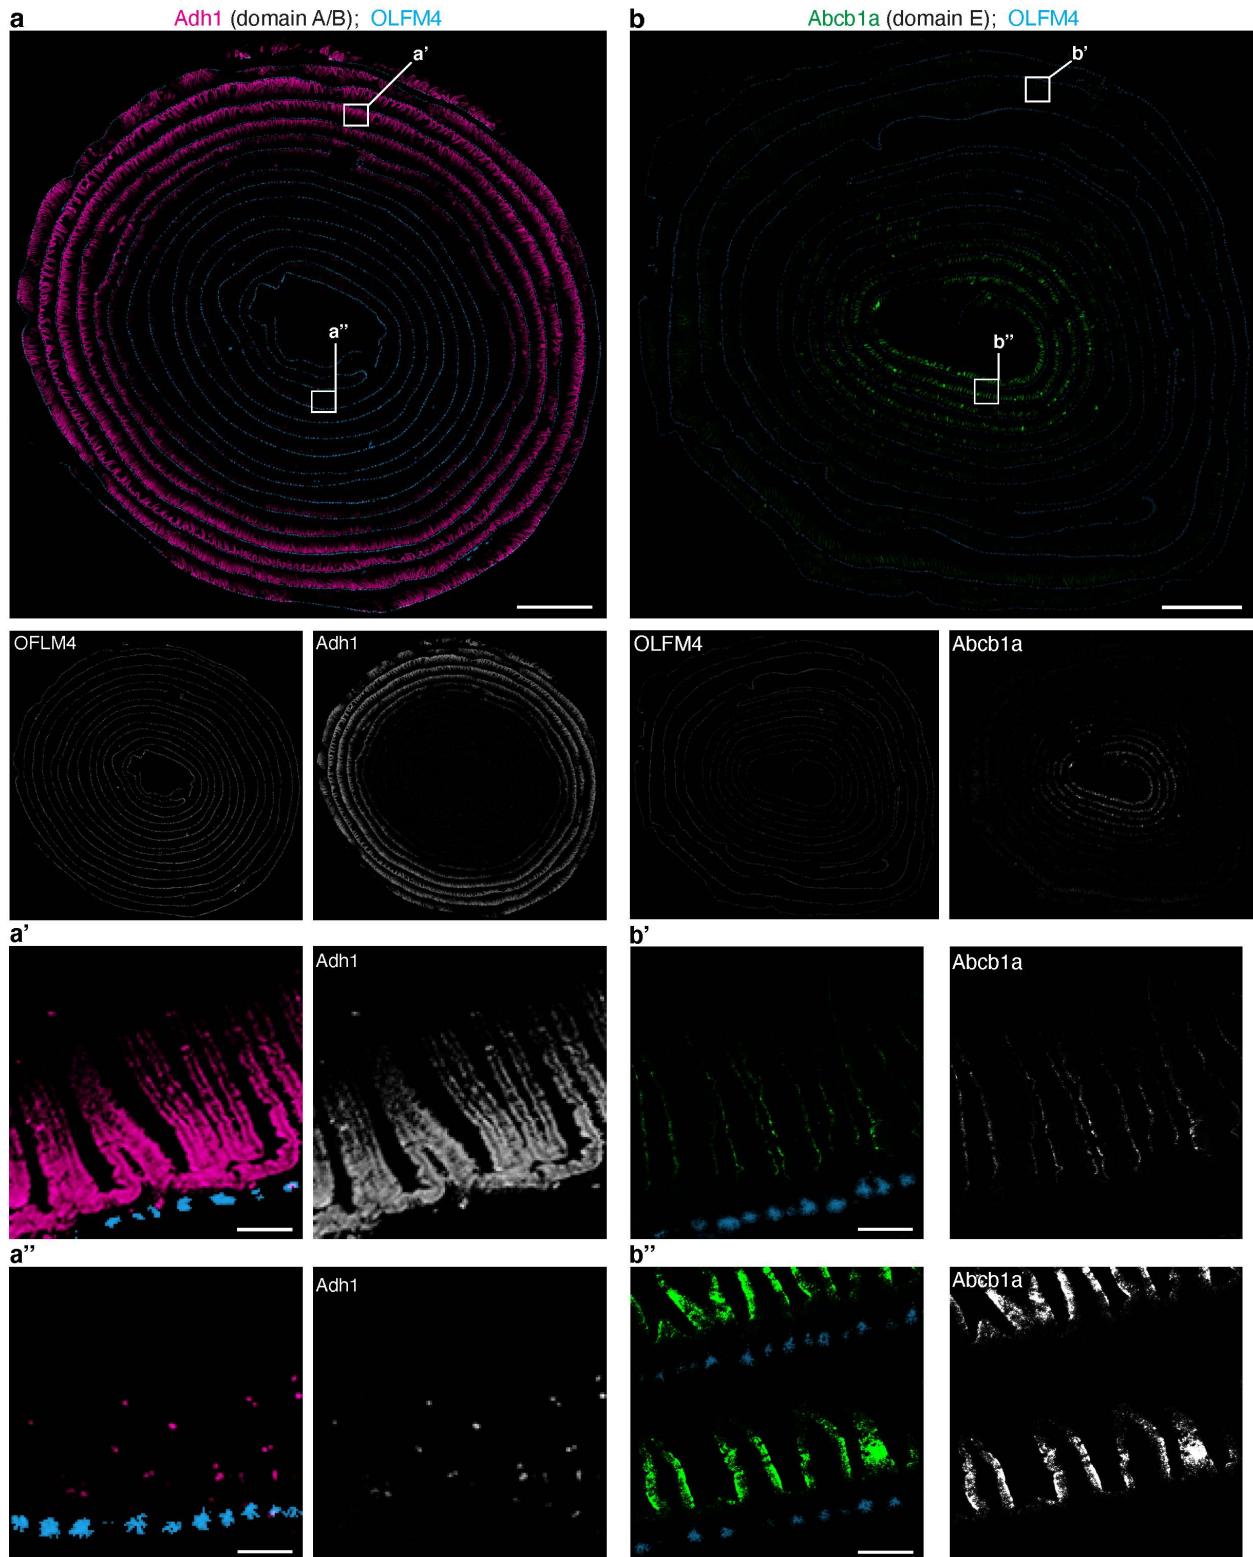

**Extended Data Fig. 10.** Single-molecule ISH validation of additional domain markers. **a,b** Full-length murine intestinal tissue coiled from the proximal (outside) end to the distal (inside) end, probed with single-molecule ISH for select marker genes of domains as indicated. Channels are shown both individually and merged with pseudocoloring. White boxes indicate insets. Scale bars are 2 mm, and 100  $\mu$ m for insets.



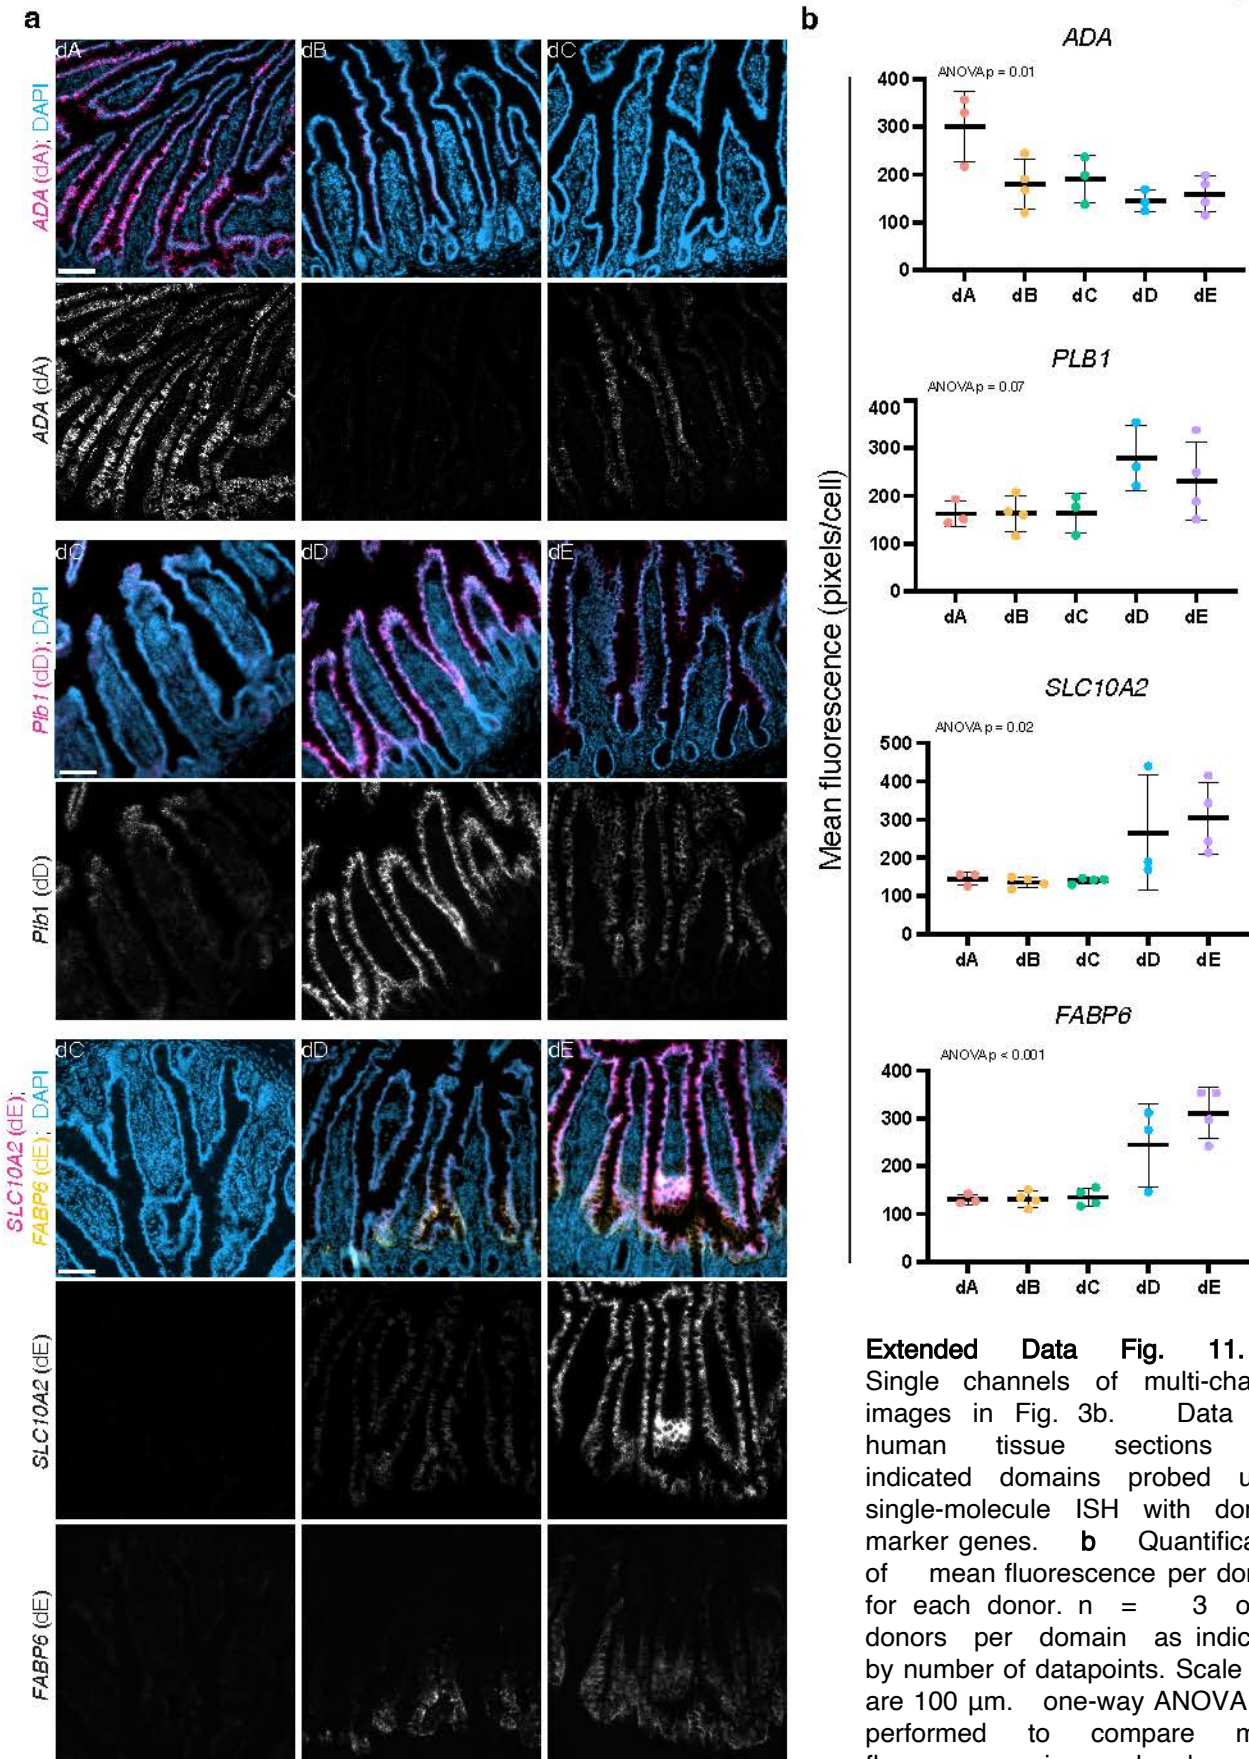



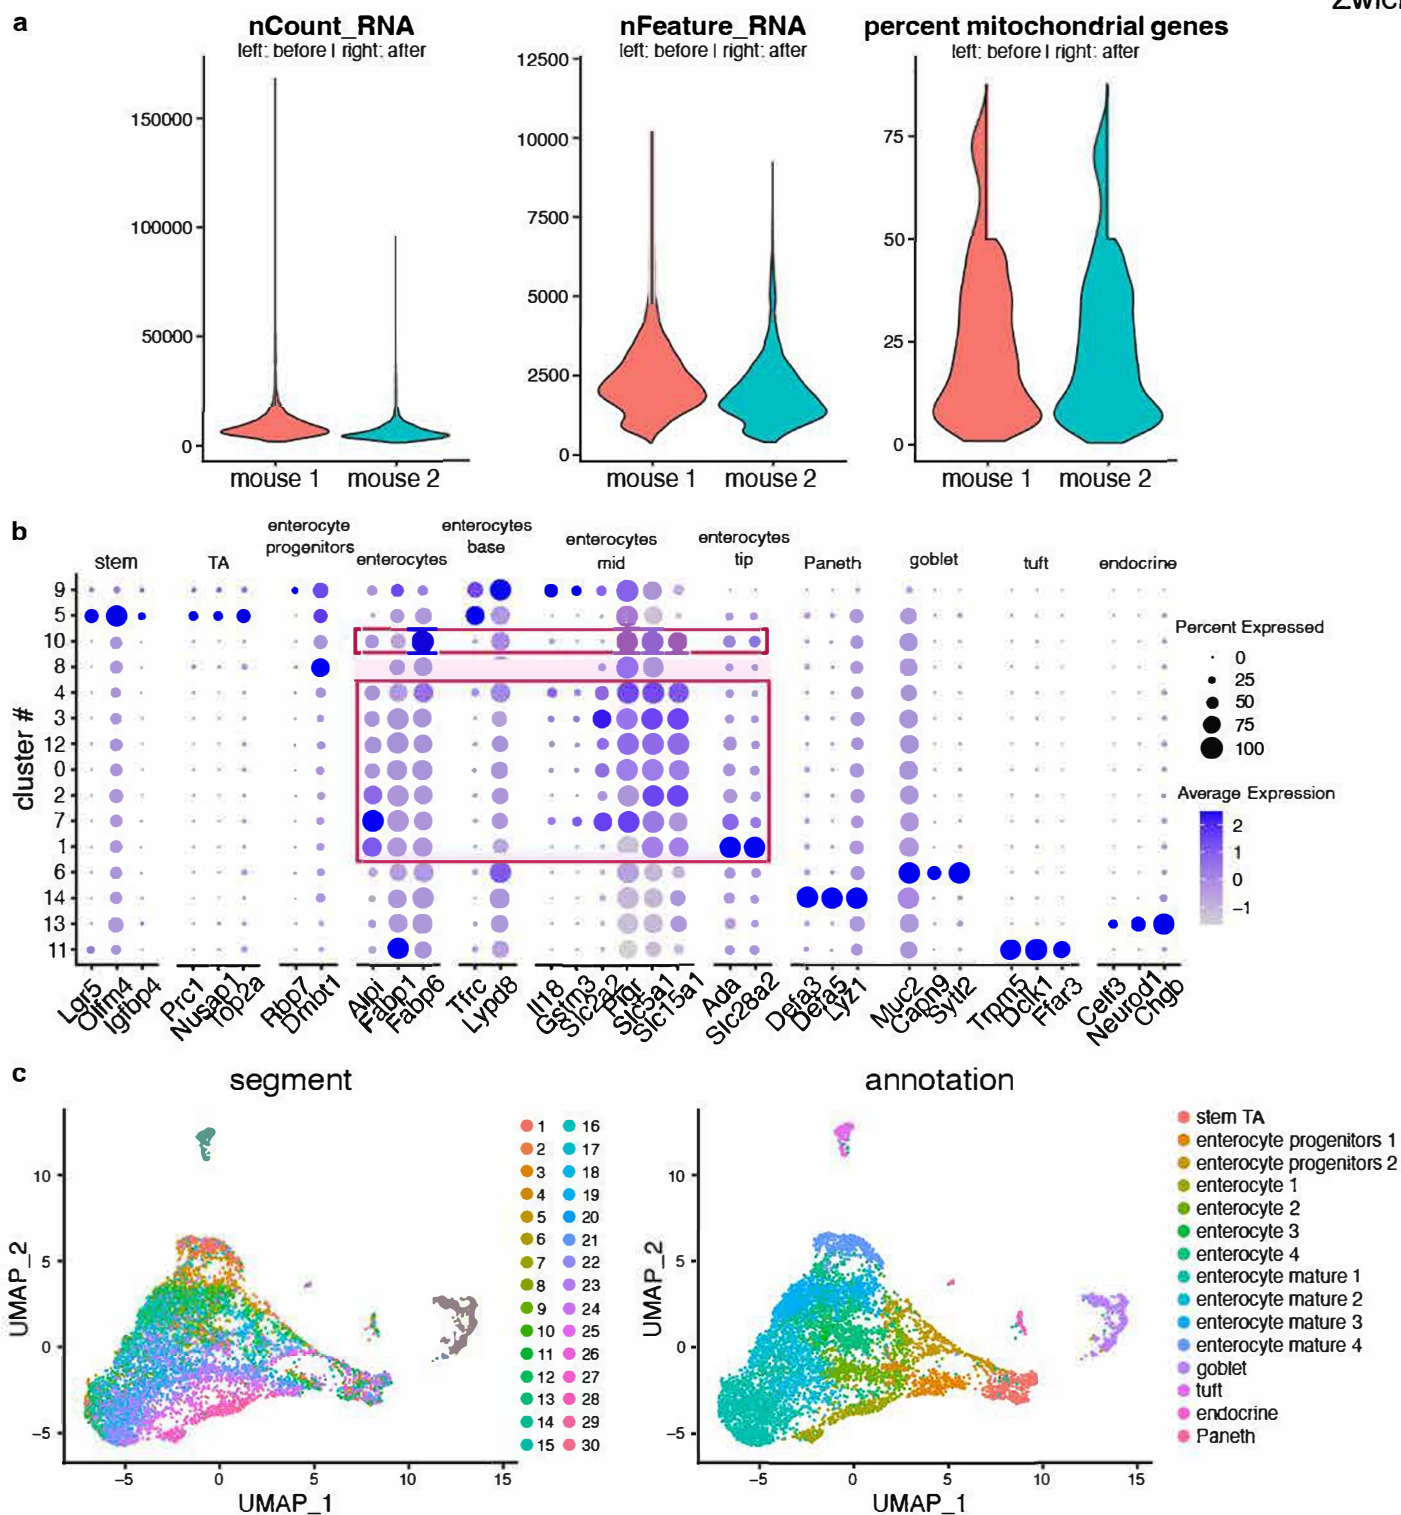

**Extended Data Fig. 12.** Quality control and initial processing of mouse scRNAseq data used in domain predictions, Fig. 3d. **a** Quality control metrics of data including number of unique molecular identifiers detected ('nCount\_RNA'), number of genes detected ('nFeature\_RNA'), and percent mitochondrial genes before and after processing data in each of two mice. **b** Dotplots showing expression of marker genes for each cell type sequenced. Red boxes denote enterocytes, which were the only cell type from these data used for downstream analysis. **c** Uniform Manifold Approximation and Projection for Dimension Reduction (UMAP) of sequenced intestinal epithelial cells post-QC, colored according to segment position (left) and cell type annotation (right). Stem, intestinal stem cell, TA transit amplifying.

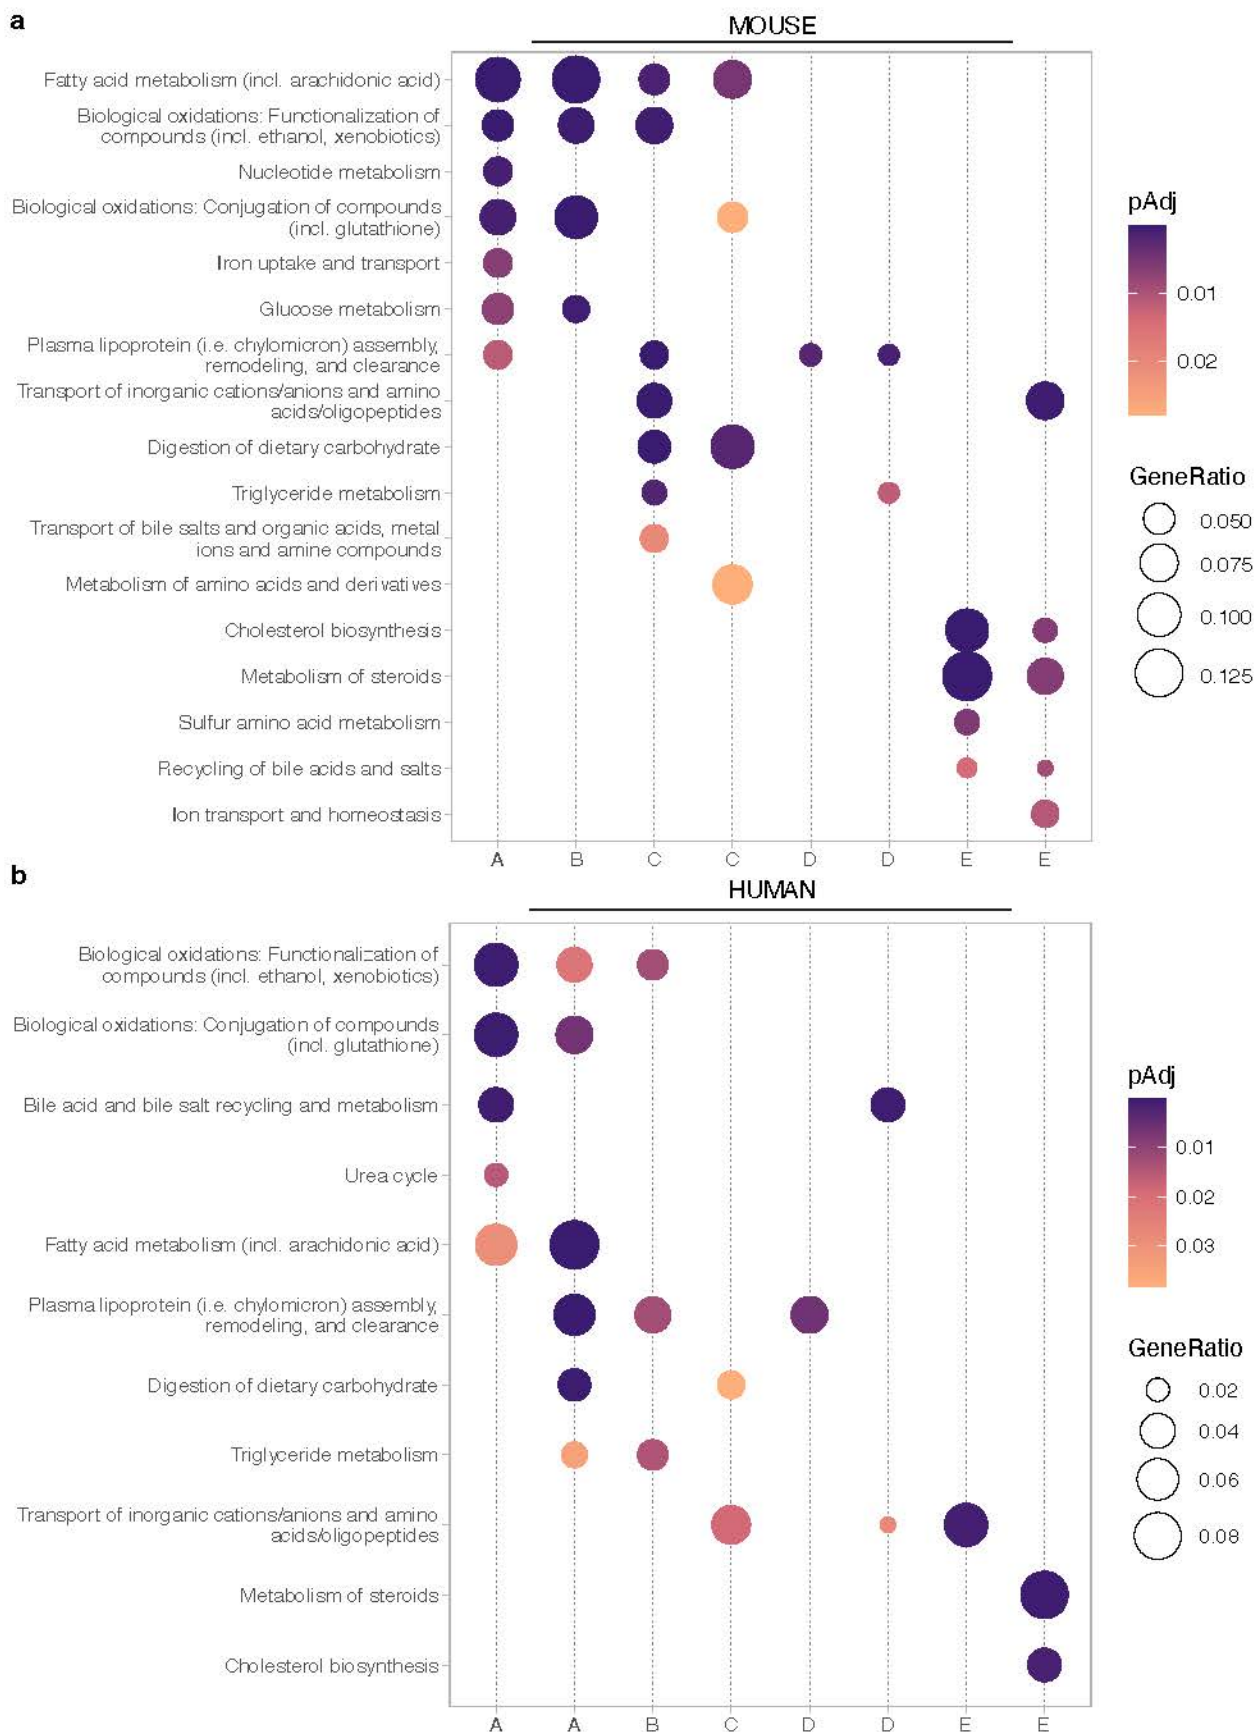

**Extended Data Fig. 13.** Functional pathways enriched in domain-associated NMF gene modules in mouse and human. **a,b** Selected enriched functional pathways in each NMF gene module displayed in Fig. 2e,f in **(a)** mouse and **(b)** human. All gene modules with a regionally variable expression profile across segments that contained genes that encode aspects of nutrient metabolism are displayed (8 modules per species, dotted vertical lines). Module labels (bottom) are the domain(s) most closely-associated with each module, as determined by regional expression profile and rank of key domain-associated signature genes. Pathways were edited to remove redundancy.

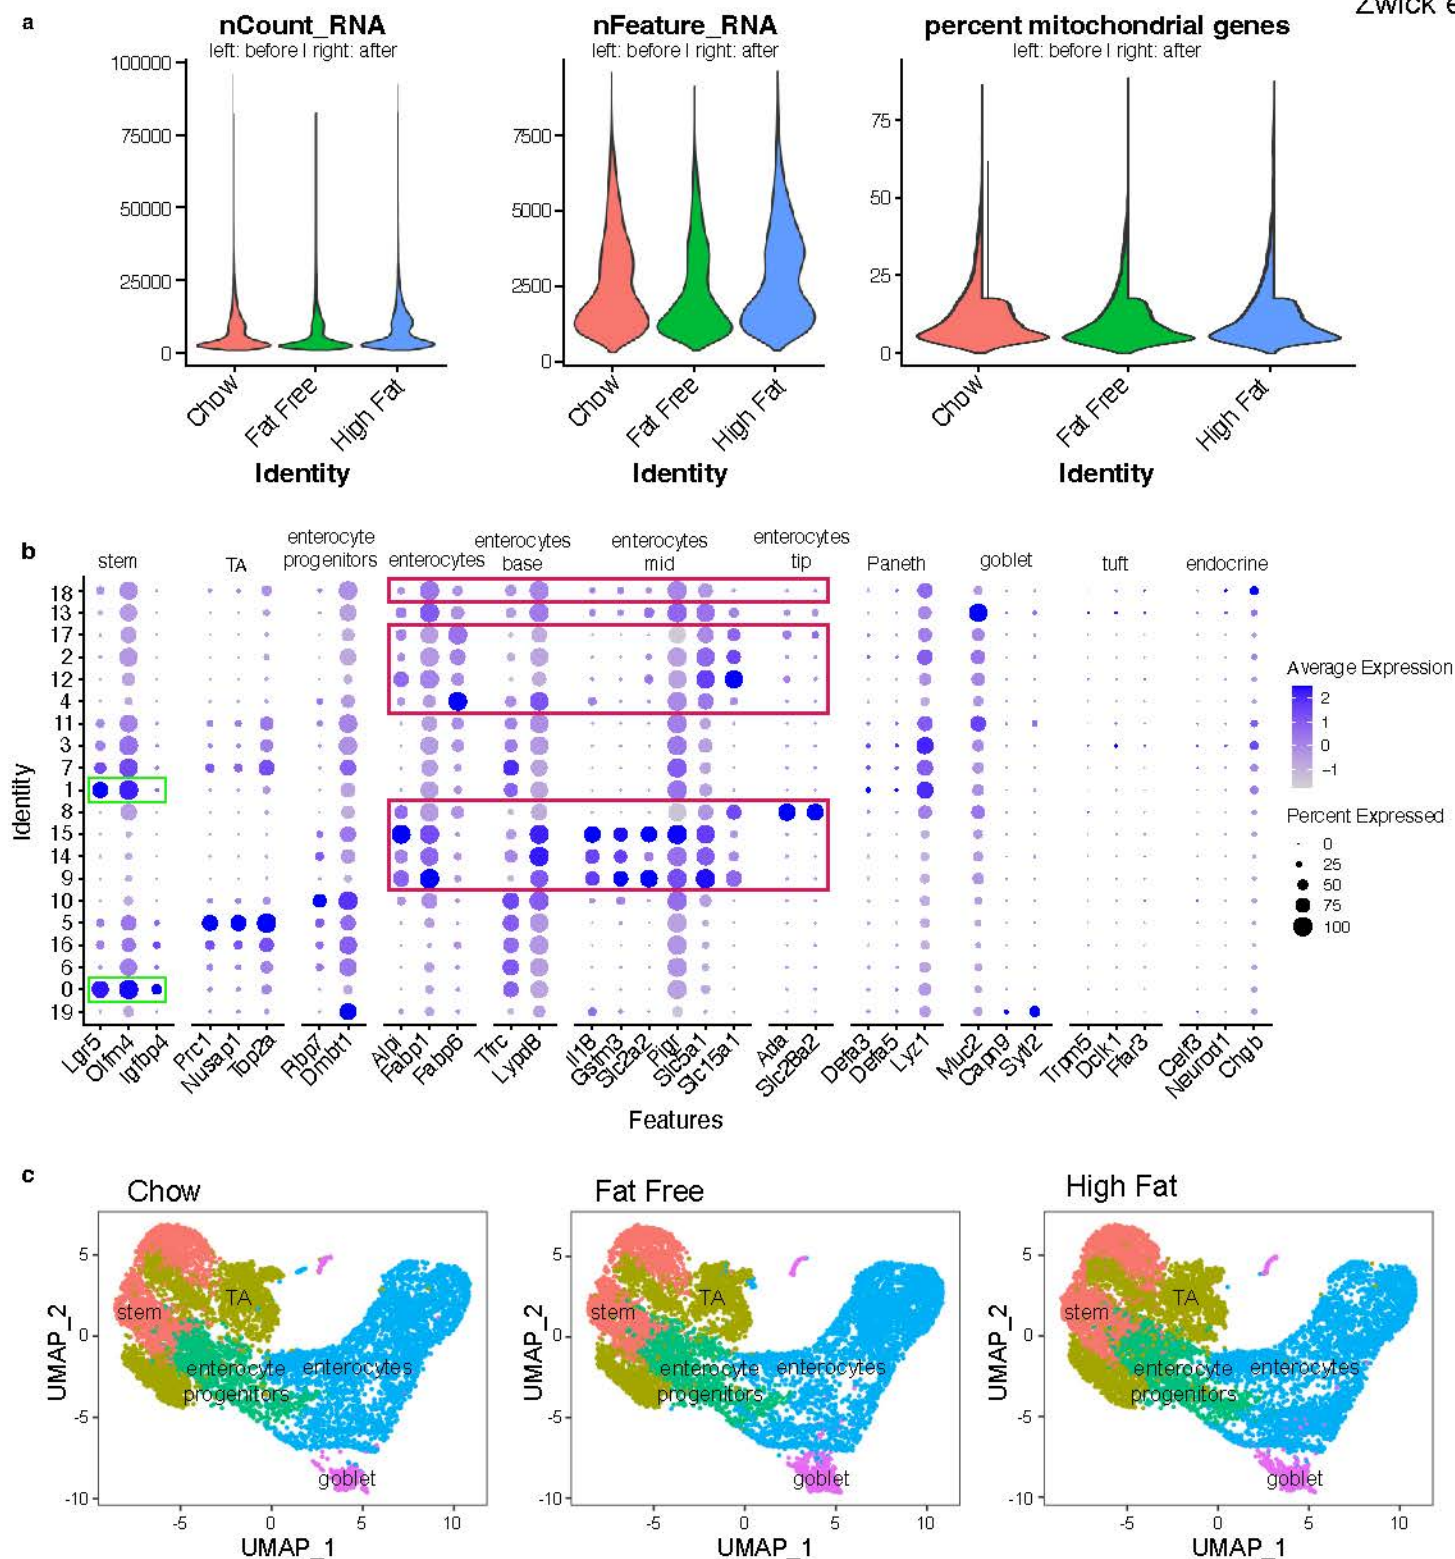

**Extended Data Fig. 14.** Quality control and initial processing of mouse scRNAseq data used in dietary intervention experiments, Fig. 4b,c. **a** Quality control metrics of data including number of unique molecular identifiers detected ('nCount\_RNA'), number of genes detected ('nFeature\_RNA'), and percent mitochondrial genes before and after processing data in each diet group. **b** Dotplots showing expression of marker genes for each cell type sequenced. Red and green boxes denote the cell types analyzed in the study. **c** Uniform Manifold Approximation and Projection for Dimension Reduction (UMAP) of sequenced intestinal epithelial cells post-QC, colored according to segment cell type annotation. Stem, intestinal stem cell, TA transit amplifying.



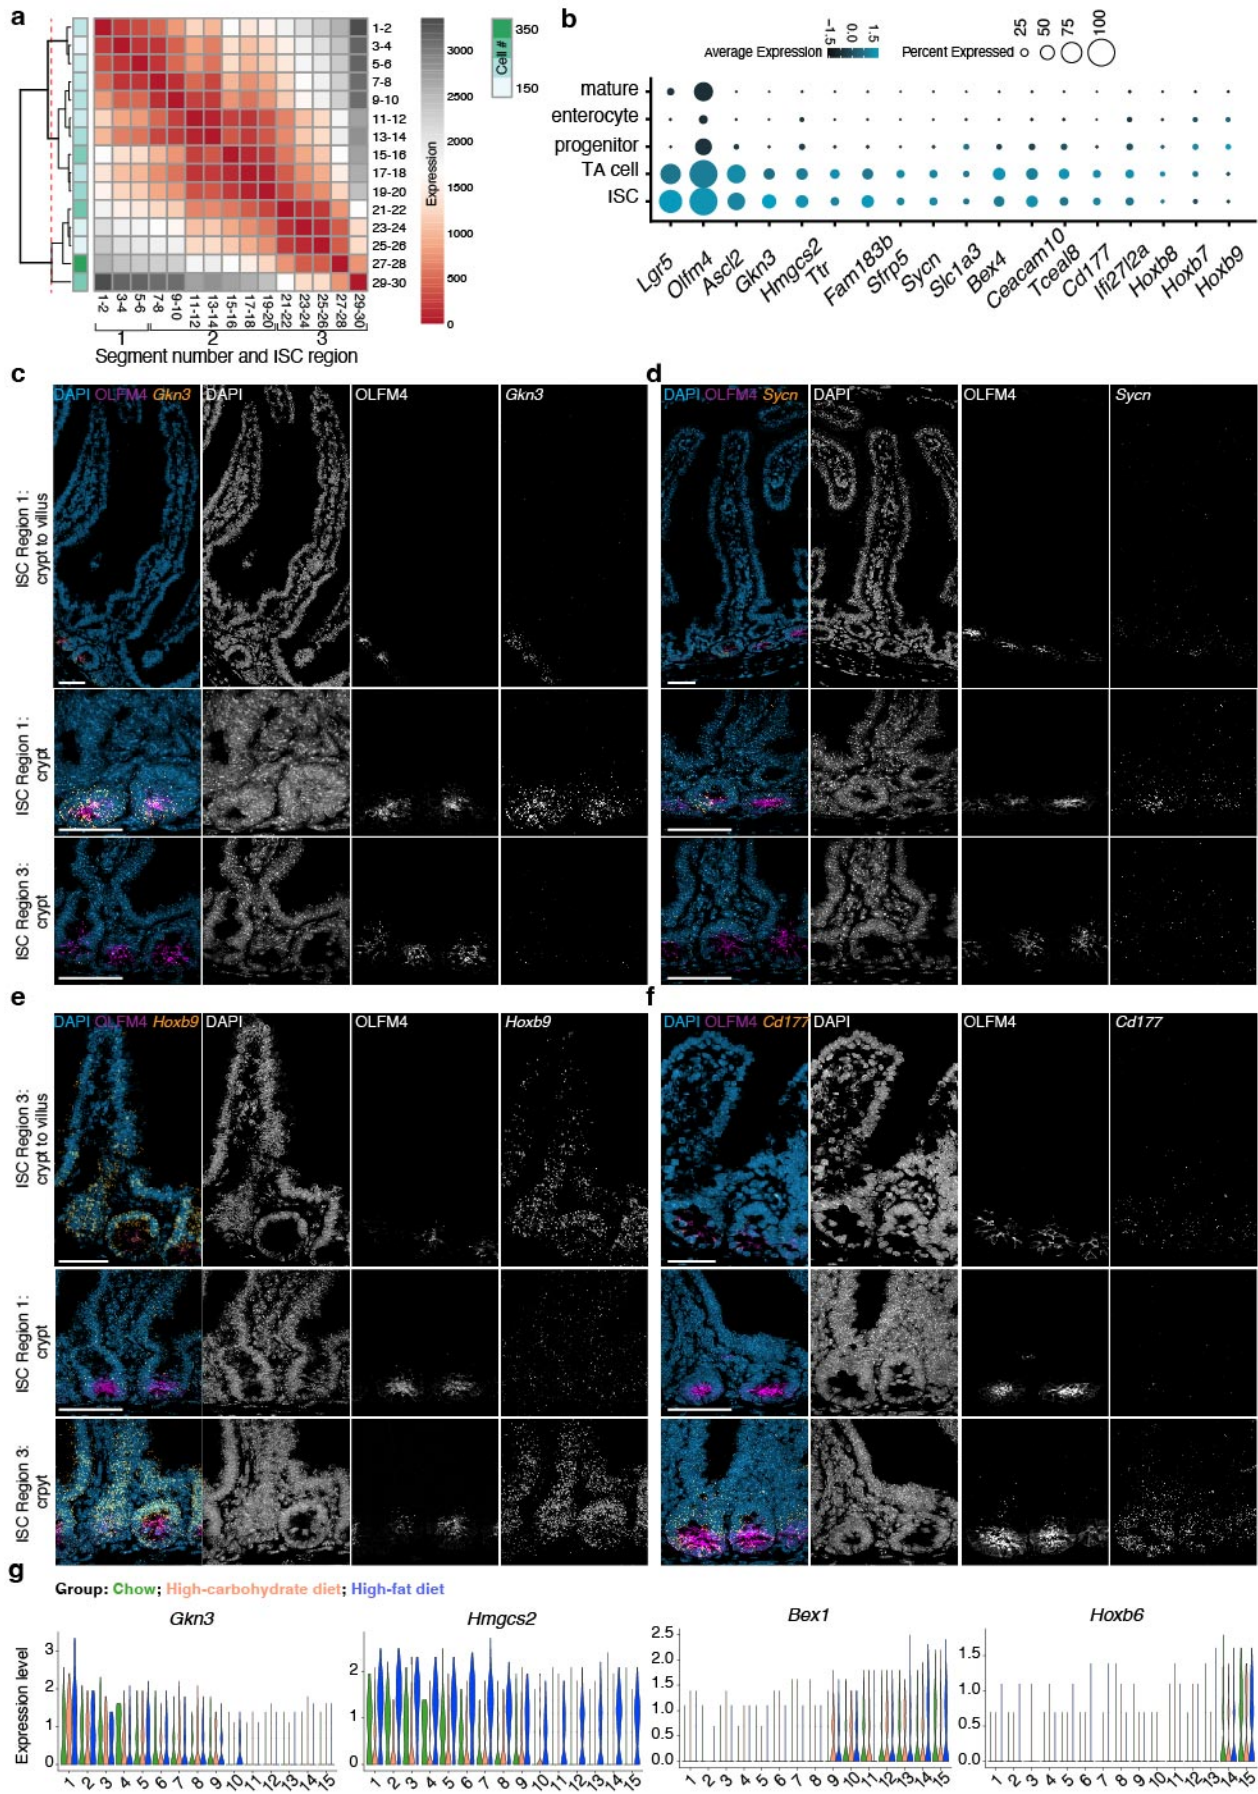

**Extended Data Fig. 15.** Divisions between regional intestinal stem cells (ISCs). **a** Jensen-Shannon Divergence between ISCs from segment pairs across the intestine, with segment pair order and hierarchical clustering based on divergence values between segments. Dotted red line indicates level of hierarchical tree of domain divisions. **b** Expression of regional ISC marker genes in absorptive lineage cells. Dot color reflects average expression, dot size reflects the percent of cells of each type expressing the marker. **c–f** Single-molecule ISH validation of key regional ISC markers. Tile scans displaying full crypt to villus units (top), and crypts from ISC regions 1 and 3 as indicated. Tissue was probed for select regional ISC marker genes as indicated (as in Fig. 5d). Channels are shown both individually and merged with pseudocoloring. Scale bars are 50  $\mu\text{m}$ . **g** Expression of ISC region 1 genes (*Gkn3* and *Hmgcs2*) and ISC region 3 genes (*Bex1* and *Hoxb6*) across ISCs from 15 segments collected from the small intestines of mice fed chow, high-carbohydrate, or high-fat diets as indicated by color. (n = 3 mice per diet group). ‘Mature’ and ‘progenitor’ refer to enterocyte state. ISC, intestinal stem cell; TA, transit amplifying.

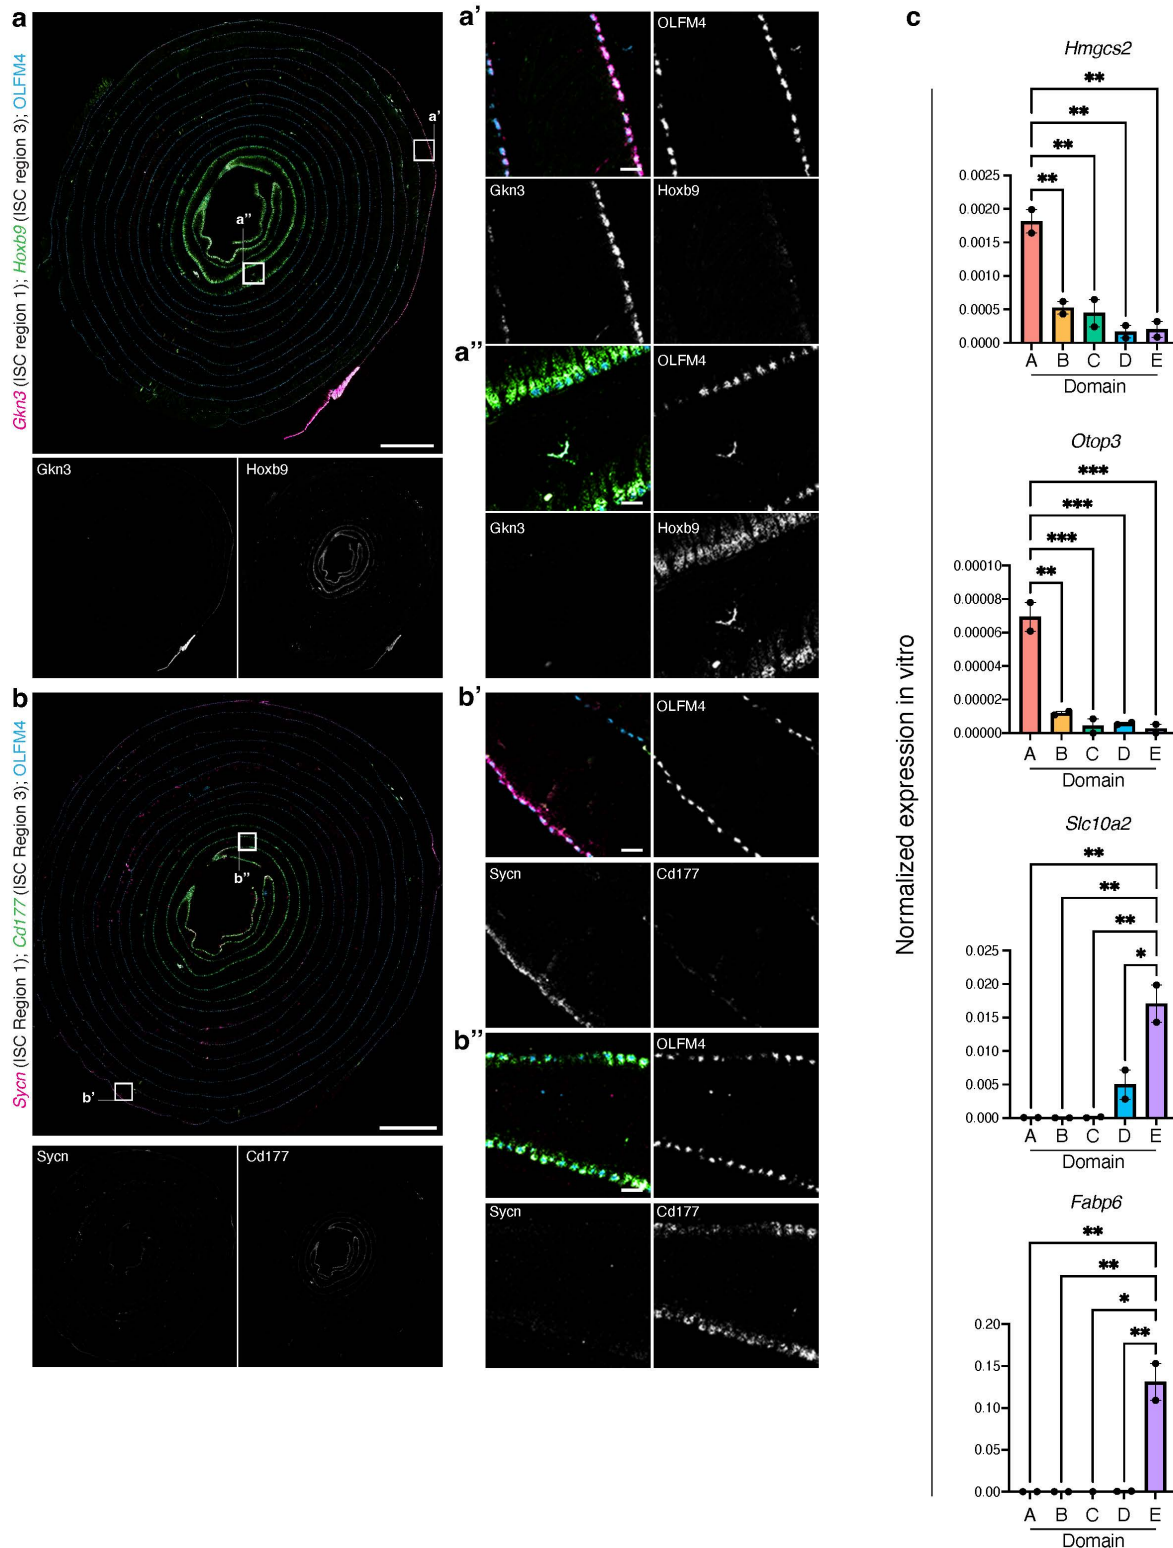

**Extended Data Fig. 16.** Single-molecule ISH validation of key regional ISC markers. **a,b** Full-length murine intestinal tissue coiled from the proximal (outside) end to the distal (inside) end, probed with single-molecule ISH for select regional ISC marker genes (as in Fig. 5d) as indicated. Channels are shown both individually and merged with pseudocoloring. White boxes indicate insets. Scale bars are 2 mm, and 100  $\mu$ m for insets. **c** qPCR confirmation of in vitro enrichment of selected Domain A (*Hmgcs2*, *Otop3*) and Domain E (*Slc10a2*, *Fabp6*) signature genes in domain A and E-derived organoids respectively, relative to other domain-derived organoid cultures. Regional organoids were cultured for > 1 month and analyzed 5–6 days after passaging. n = 2 organoid lines (biological replicates) per domain.



**a** Analytic pipeline for identifying candidate regulators of domain identity

**Key:** Differences and similarities between ChEA3 and SCENIC methods

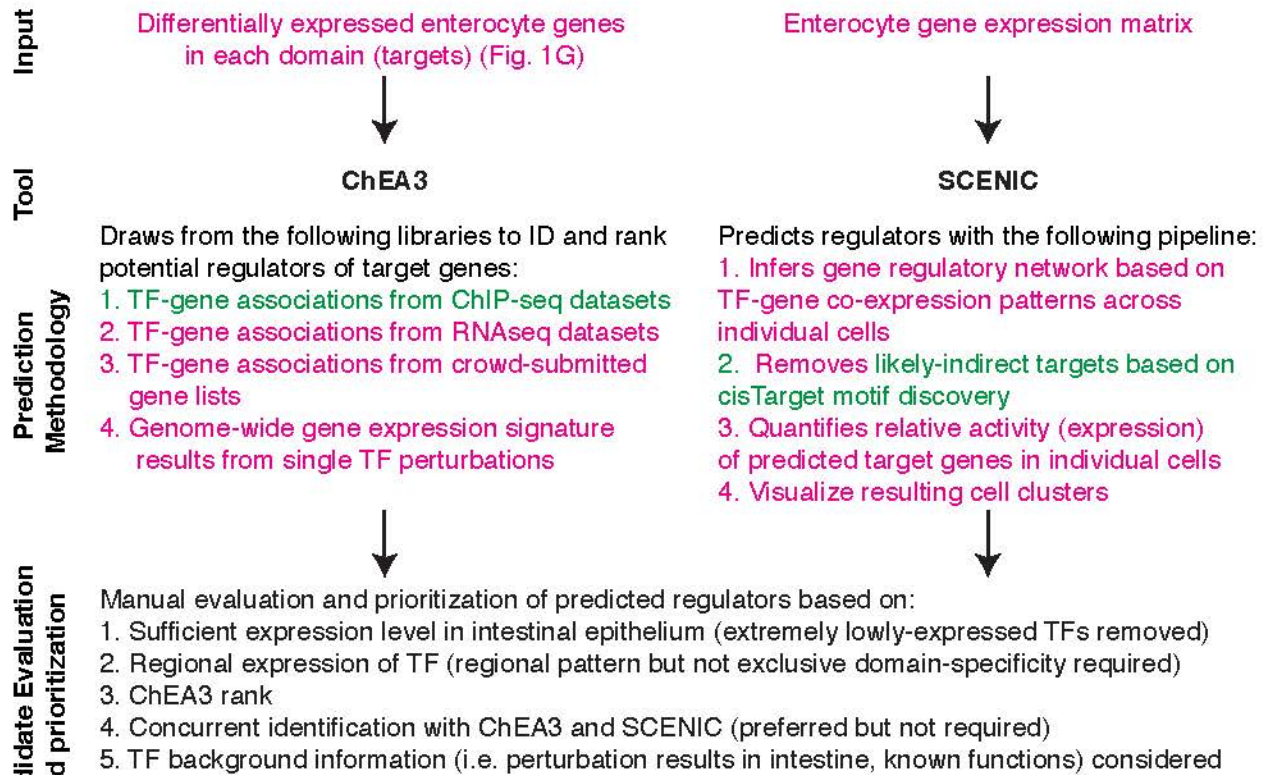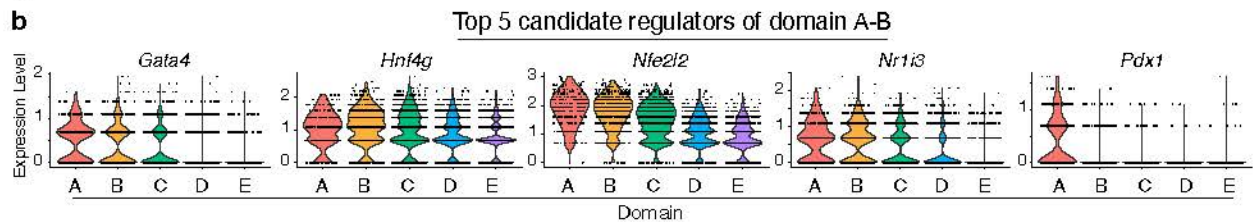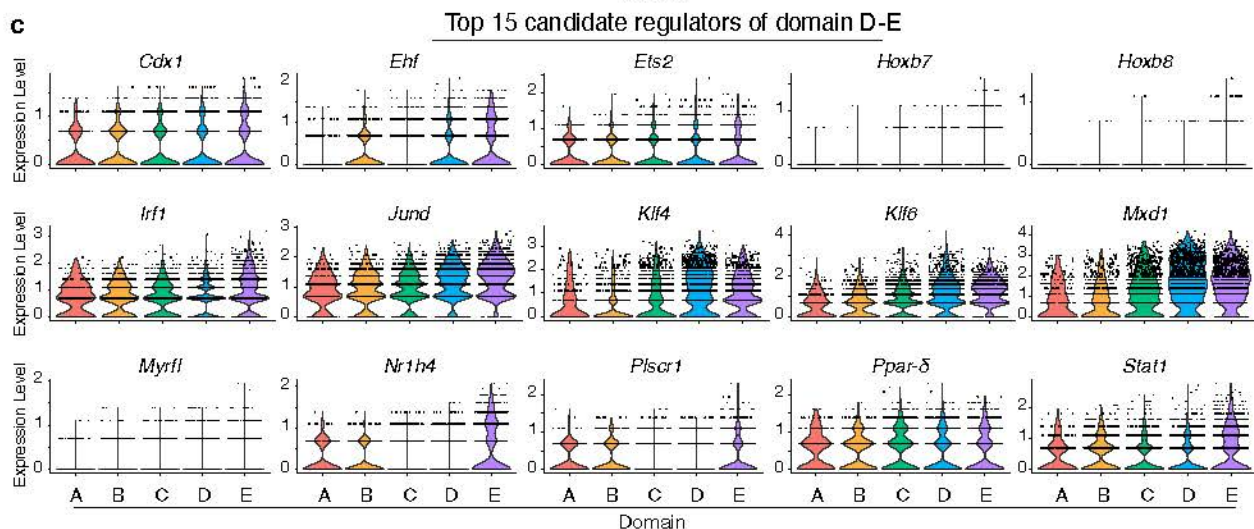

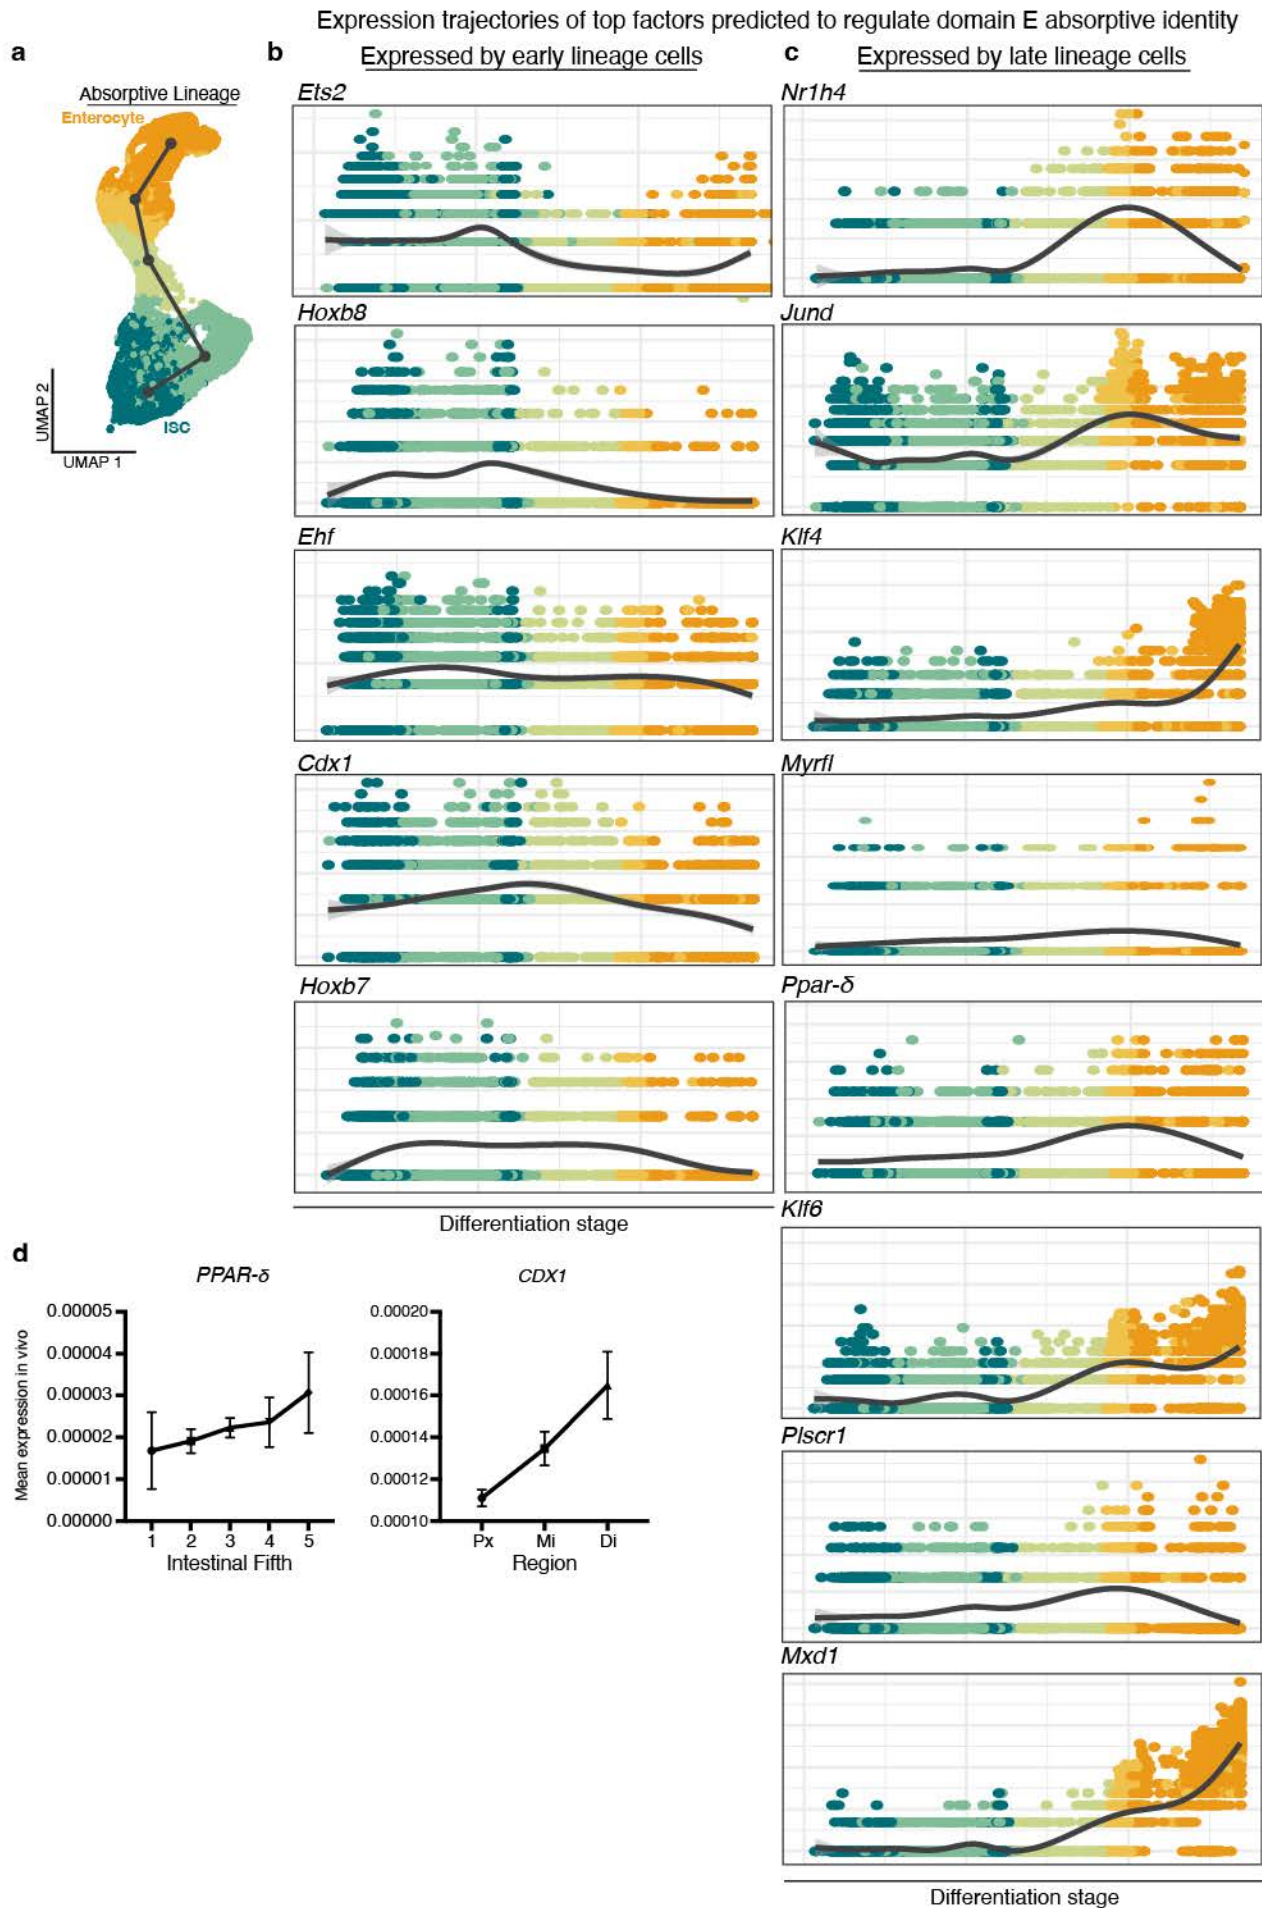

**Extended Data Fig. 17.** Identification of top candidate regulators of domain identity. **a** Analytic pipeline for predicting regulators of domain identity using gene regulatory inference tools ChEA3 and SCENIC. Methodological distinctions and commonalities between these pipelines indicated in magenta and green, respectively. Criteria for ranking ChEA3 and SCENIC results are described. **b,c** Domain-wise expression levels of 5 candidate regulators of domain A and B identities (**b**) and 15 candidate regulators of domain D and E identities (**c**), identified using the pipeline outlined in **a**.



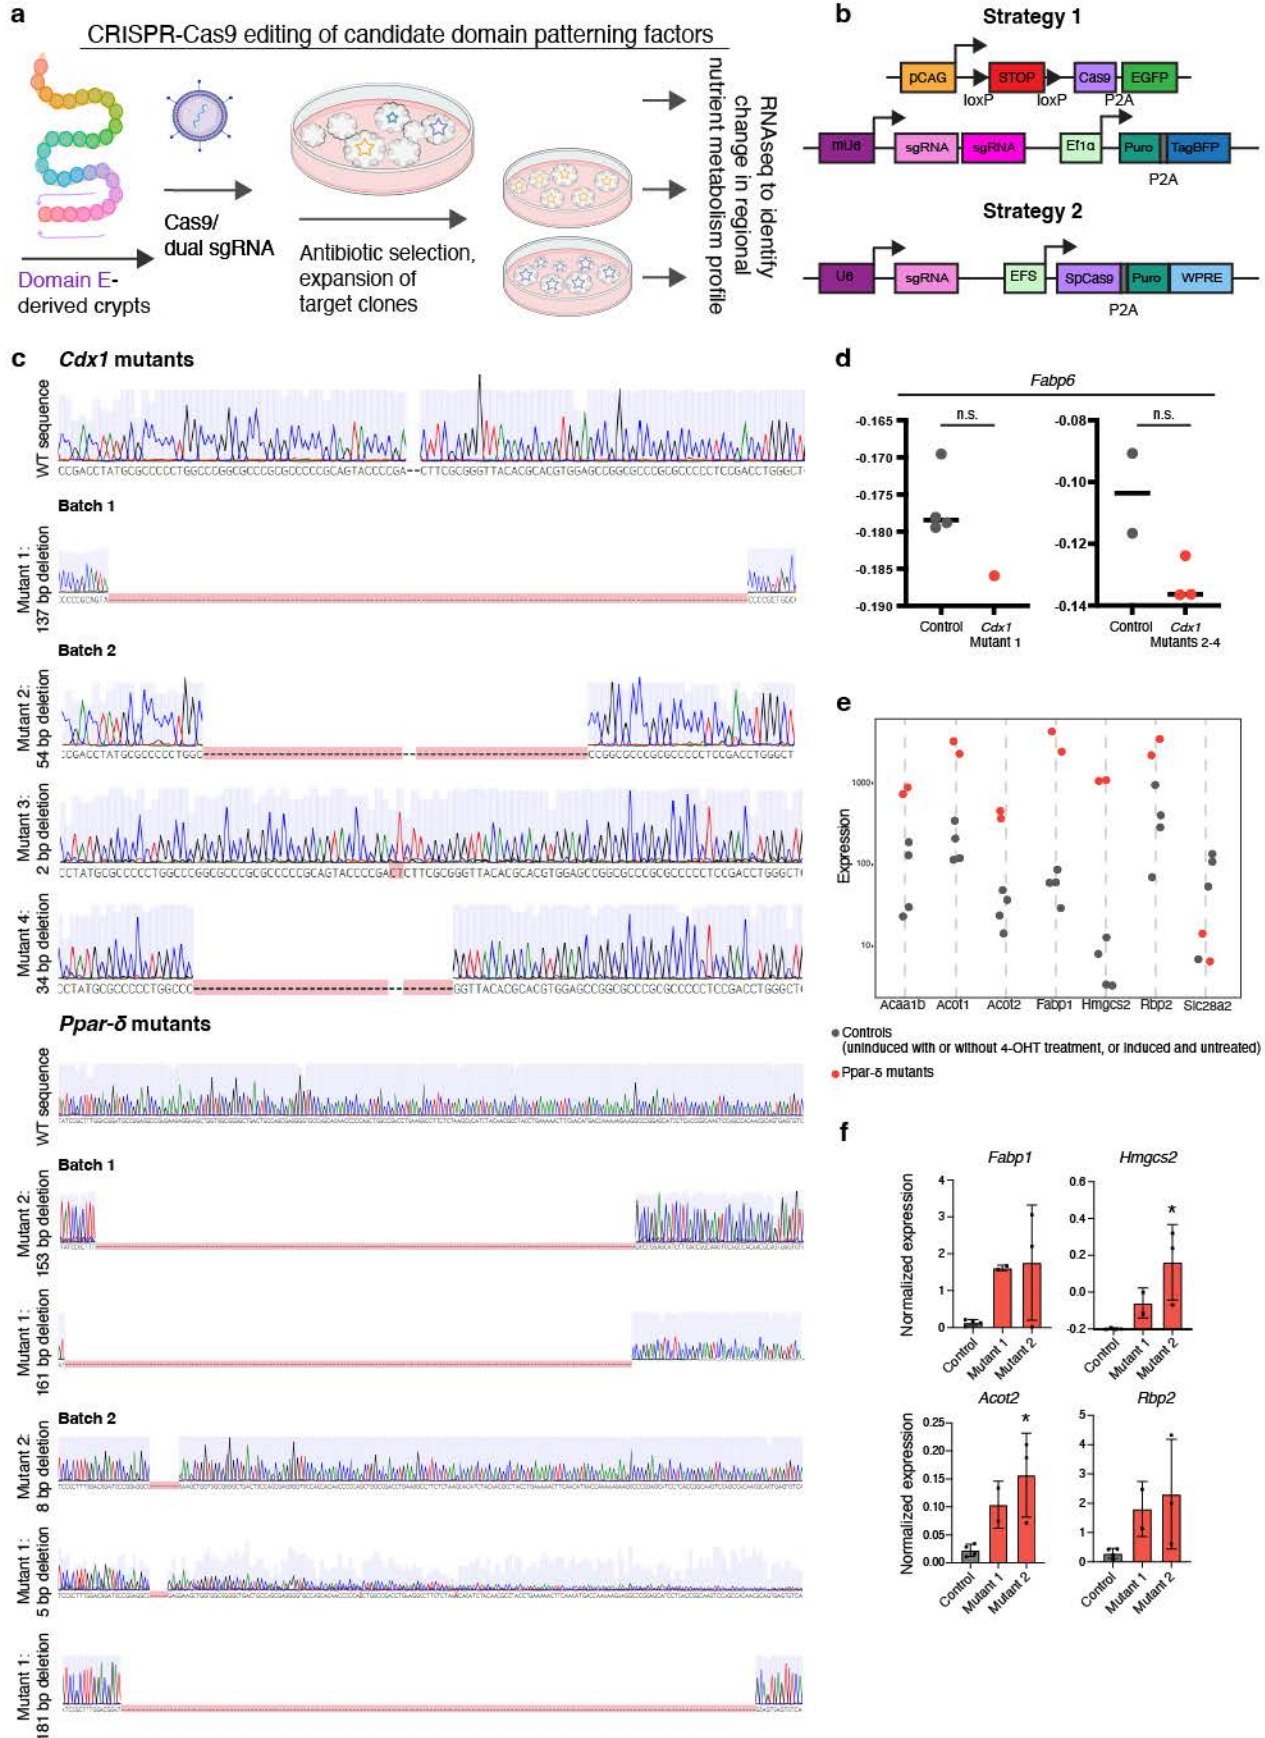

**Extended Data Fig. 19.** Generation and analysis of *Ppar- $\delta$*  and *Cdx1* mutant domain E organoids. **a,b** Schematics of CRISPR/Cas9 gene targeting strategy. Cas9 endonuclease was encoded in an endogenous genomic locus and 4-hydroxytamoxifen-induced (strategy 1) or delivered by lentiviral vector (strategy 2). Target-specific sgRNAs were delivered by lentiviral vectors (strategy 1 and 2) to induce mutations in the protein coding regions of the target genes. Following mutagenesis, selected clones were expanded and genotyped. Clones containing exclusively deleterious alleles were used for downstream analysis. **c** *Cdx1* mutant organoid sequences from CRISPR editing strategy 1 ('batch 1', n = 1 mutant line from mouse 1) and 2 ('batch 2', n = 3 unique mutant lines from mouse 2), and *Ppar- $\delta$*  mutant organoid sequences from editing strategy 1 ('batch 1', n = 2 mutant line from mouse 1) and 2 ('batch 2', n = 3 unique mutant lines from mouse 2). Indel mutations are specified. **d** Trend towards decreased expression of *Fabp6* in *Cdx1* mutant lines in both batches of mRNAseq expression data from editing strategies 1 and 2, which could not be merged. Line represents median. **e** Expression of differentially expressed genes in individual *Ppar- $\delta$*  mutant organoid lines from batch 1 mutants (red dots) and control organoid lines (black dots). Batch 2 expression data of these and other DEGs in Fig. 6e,g. **f** Normalized mRNA levels of select DEGs of interest in *Ppar- $\delta$*  mutant organoids, validated with real time PCR. \*P < 0.05 calculated using one-way ANOVA with Tukey's multiple comparison test. Data are mean  $\pm$  SD (2-3 technical replicates per line). bp, base pair; DEGs, differentially expressed genes, n.s. not significant.



## 555 **Methods**

### 556 Mouse and human sample information and processing for scRNAseq

#### 557 **Mice**

558 Male and female  $Lgr5^{DTR-GFP51}$  mice were used for scRNAseq and RNAscope  
559 experiments in Fig. 1 and Fig. 3, and female C57BL/6J (Jackson Laboratory Strain  
560 #000664, used 1 week after arrival) for diet modulation scRNAseq experiments.  
561 Regional organoids to assess maintenance of regional signatures were generated from  
562 adult C57BL/6J mice; for CRISPR modulation from either  $Lgr5^{creERT252}$ ;  $Rosa26^{LSL-Cas9-}$   
563  $eGFP/+$  (Jackson Laboratory strain #026175)<sup>53</sup>; ROSA26<sup>tdTomato</sup> (Jax 007905)<sup>54</sup> mice  
564 (strategy 1) or  $Lgr5^{DTR-GFP51}$  mice (strategy 2). Mice were 8–16 weeks of age at the start  
565 of each experiment. Previously defined<sup>19</sup> specialized, purified high-fat / low-  
566 carbohydrate and high-carbohydrate / low-fat diets were purchased from Envigo and  
567 administered for 7 days. Rodent work was carried out in accordance with approved  
568 protocols by the Institutional Animal Care and Use Committee at the University of  
569 California San Francisco (UCSF).

570

#### 571 **Human Intestinal Tissue**

572 Human adult intestinal tissues were obtained from research-consented deceased  
573 organ donors at the time of organ acquisition for clinical transplantation through an IRB-  
574 approved research protocol with Donor Network West, the organ  
575 procurement organization for Northern California, in collaboration with the UCSF Viable  
576 Tissue Acquisition Lab (VITAL) Core. The first donor was a 44YO female with a BMI of  
577 27 kg/m<sup>2</sup> and the second donor a 30 YO male with a BMI of 25 kg/m<sup>2</sup>, both free of  
578 chronic and gastrointestinal diseases and cancer, and negative for hepatitis B/C, HIV,  
579 and COVID-19. Full-length intestinal tissues were collected after the clinical  
580 procurement process was completed, stored and transported in University of Wisconsin  
581 preservation media on ice, and delivered at the same time as organs for transplantation.  
582 The study and all VITAL core studies are IRB-designated as non-human  
583 subjects research, as tissues are from de-identified deceased individuals without  
584 associated personal health information.

## 585 **Sample Dissociation**

586 *Mouse Tissue:* Small intestinal tissues were removed from carcass and measured. The  
587 intestine from each mouse was lateralized, washed with RPMI (ThermoFisher) 'FACS  
588 media' supplemented with 3% FBS, Pen/Strep, Sodium Pyruvate, MEM non-essential  
589 amino acids, and L-glutamine, and cut into 30 pieces of equal length, or 15 pieces for  
590 dietary intervention studies. A single cell dissociation of the intestinal epithelium was  
591 obtained as previously described<sup>19</sup>. Briefly, tissue was incubated in the supplemented  
592 RPMI media described above with 5mM EDTA and 10mM DTT at 37°C with 5% CO<sub>2</sub>  
593 for 20 minutes with agitation. Intestinal pieces were then triturated with a p1000 pipette,  
594 strained sequentially through 100  $\mu$ m and 70  $\mu$ m filters, and washed in RPMI containing  
595 2 mM EDTA to separate the epithelial fraction.

596  
597 *Human Tissue:* Donated small intestines were stretched across an ice-covered trench drain  
598 and measured to be 546 cm (donor 1) and 667 cm (donor 2) long. These lengths were  
599 divided into 30 equal segments. 12 mm dermal punch biopsies (Acuderm inc.) and  
600 dissection scissors were used to collect 3–6 biopsies as technical replicates from within  
601 the central 4cm area in each segment. Punches were washed in DMEM/F12  
602 (ThermoFisher) and PBS. Single epithelial cells were dissociated following previously  
603 published methods<sup>55</sup>. Briefly, cells were dissociated in Ca/Mg-free HBSS  
604 (ThermoFisher) with 10mM EDTA, Pen/Strep, HEPES, 2% FBS, and freshly  
605 supplemented with 5mM EDTA for 20–30 minutes at 37°C with 5% CO<sub>2</sub> with agitation,  
606 and then for 15 minutes on ice. Cells were then triturated, treated sequentially with  
607 TrypLE (Gibco), DNaseI (Roche), and ACK lysis buffer as needed (ThermoFisher), and  
608 filtered through a 70  $\mu$ m filter.

609

## 610 **Sample barcoding via MULTI-seq**

611 Single murine and human cell suspensions from each segment were pelleted, washed,  
612 and resuspended with serum-free FACS media (as FBS and BSA prevent effective cell  
613 barcoding). MULTI-seq barcoding was performed as previously reported<sup>15</sup>: cells were  
614 suspended for 5 minutes on ice first with an anchor/barcode solution and then for 5

615 minutes on ice with a co-anchor solution. Following barcoding, cells from the proximal-  
616 most, middle, and distal-most 10 segments from mice and donor 1, and from segments  
617 with similar dissociated cell yields from donor 2, were pooled to help ensure relatively  
618 even sampling across the tissue length in subsequent steps.

619

## 620 **FACS**

621 Pooled cells were stained with antibodies against CD45 (anti-mouse: BioLegend cat#  
622 103130, anti-human: BD cat# 564047); EpCAM (anti-mouse: BioLegend cat# 118214,  
623 anti-human: BioLegend cat# 324208); and CD44 (anti-mouse/human: BioLegend cat  
624 #103026), and with DAPI. Live (DAPI<sup>-</sup>), single epithelial cells (CD45<sup>-</sup>, EpCAM<sup>+</sup>) with  
625 the exception of CD45<sup>+</sup> tuft cells<sup>2</sup>, and progenitors (CD45<sup>-</sup>, Ep-CAM<sup>+</sup>, CD44<sup>+</sup>, Lgr5-  
626 DTR-GFP<sup>+</sup> mouse cells and CD45<sup>-</sup>, Ep-CAM<sup>+</sup>, CD44<sup>+</sup> human cells), were isolated  
627 using a BD FACSAria II equipped with FACSDiva Software Version 8 at the UCSF  
628 Parnassus Flow Cytometry Core. Plots were presented using FlowJo Version 10  
629 (Extended Data Fig. 1).

630

## 631 **Single cell barcoding, library preparation, and sequencing**

632 Sorted total epithelial and progenitor-enriched cells from each species were pooled  
633 separately before processing in individual lanes with the 10x Genomics Chromium  
634 system. Library preparation was conducted according to the 10x Genomics standard  
635 protocol, with modifications for MULTI-seq barcode library assembly as previously  
636 described<sup>15</sup>. Briefly, a MULTI-seq primer is added to the cDNA amplification mix. In the  
637 first SPRI bead clean-up step, the supernatant is transferred for a SPRI bead cleanup  
638 step. A PCR is also performed for MULTI-seq barcodes. Barcode libraries were  
639 analyzed using a Bioanalyzer High Sensitivity DNA system and sequenced.

640

641 Gene expression and barcode cDNA libraries were pooled and sequenced using an  
642 Illumina Novaseq 6000 machine at the UCSF Center for Advanced Technology (mouse  
643 samples and donor 2) and Institute for Human Genetics (donor 1).

644

645 Analysis of single cell sequencing data

646 **Initial data processing**

647 All analysis steps were performed using RStudio unless otherwise noted. Mouse set 1  
648 sequencing reads were aligned using CellRanger version 3.0.1 (10x Genomics) to the  
649 mouse mm10-3.0.0 reference (10x Genomics). Sequencing reads for donor 1 were  
650 aligned using kallisto-bustools v0.46.2<sup>56</sup> to the human GRCh38.95 reference.

651 Sequencing reads for donor 2, mouse set 2 and the mouse diet experiment were  
652 aligned using CellRanger version 7.0.0 (10x Genomics) to the same respective  
653 references.

654

655 Raw gene expression count matrices were filtered using DropletUtils<sup>57</sup> to identify real  
656 cells. Demultiplexing and removal of predicted doublets and unclassified cells was done  
657 with the deMULTIplex R package<sup>15</sup> for mouse set 1 scRNAseq data; with the  
658 hashedDrops function of DropletUtils for donor 1 scRNAseq data; and with a  
659 combination of the hashedDrops function of DropletUtils and deMULTIplex<sup>258</sup> for the  
660 donor 2 scRNAseq, mouse set 2, and mouse diet data. Finally, identified cells were  
661 filtered according to number of UMIs per cell, number of genes per cell, and percentage  
662 of mitochondrial gene reads per cell (c.f. Extended Data Fig. 2, 4, 5, 12, and 14).

663

664 After performing sample demultiplexing on the murine set 1 and donor 1 scRNAseq  
665 data, we addressed two experimental issues computationally. First, in the murine  
666 scRNAseq data, we noted that identical MULTIseq sample barcodes were inadvertently  
667 applied to cells derived from segments 9–16 in the two mice sampled, as evidenced by  
668 the mix of male and female sex-linked genes in cells assigned to ‘Mouse A’, and a  
669 complete lack of cells in the same regions of cells assigned to ‘Mouse B’ (Extended  
670 Data Fig. 3). To distinguish between individual mouse samples, we used scPred<sup>59</sup> to  
671 train a classifier that assigns cells from all segments to male, female, or unassigned  
672 status, and associated them to the appropriate segment position in mouse ‘A’ or ‘B’  
673 accordingly (Extended Data Fig. 3b,c). Second, in the human scRNAseq data, we noted  
674 that human cells associated with the MULTIseq barcode for segment 30 were not



675 recovered, which may be due to inefficient barcode labeling or sequestering of the  
676 barcode by dead cells or highly viscous mucus content in the distal-most portion of the  
677 human intestine during cell dissociation. All analysis of human data was therefore  
678 performed on segments 1–29, as displayed in the relevant Figures.

679  
680 Mouse set 1 and donor 1 data were processed in Seurat V3<sup>60</sup>. Donor 2, mouse set 2  
681 and the mouse diet experiment were processed in Seurat V4<sup>60</sup>. For mouse sets 1 and 2,  
682 total epithelial and progenitor-enriched samples were processed with the SCTransform  
683 function<sup>61</sup> with 3000 features requested, with regression of differences in cell cycle state  
684 among cells, the level of expression of mitochondrial genes and of a set of sex-specific  
685 genes (Xist, Tsix, Ddx3y, Eif2s3y), followed by integration with Seurat's IntegrateData  
686 function. Since the focus on mouse set 2 was on enterocytes, we did not integrate or  
687 further process cells from the progenitor-enriched fraction. The mouse diet samples  
688 were processed in the same way except for the regression of the expression of sex  
689 genes since all the mice in this dataset were females. Donor 1 total epithelial and  
690 progenitor-enriched samples were processed with the SCTransform function with 3000  
691 features requested, with regression of the level of expression of mitochondrial genes,  
692 followed by integration with the fastMNN function. fastMNN integration was applied to  
693 the human scRNAseq data because it was the most effective procedure to correct batch  
694 effects between total epithelial and progenitor-enriched samples. Donor 2 total epithelial  
695 and progenitor-enriched samples were merged and processed with the SCTransform  
696 function with 3000 features requested, with regression of the level of expression of  
697 mitochondrial genes. Data from donor 2 did not require integration.

698  
699 We performed data dimensionality reduction using principal component analysis in  
700 Seurat for all datasets except donor 1, for which the MNN components identified with  
701 fastMNN integration were used as low-dimension components. The number of principal  
702 components used was determined for each sample by inspection of the sample's elbow  
703 plot. The following top components were used: mouse set 1, 50; mouse set 2, 32;  
704 mouse diet, 30; donor 2, 36; finally for donor 1 we used the first 50 MNN components.

705 We also tested the stability of the downstream results (number of identified cluster,  
706 shape of the UMAP) to different choices of number of top principal components.  
707 Following dimensionality reduction, the nearest neighbor graph was calculated with the  
708 Seurat function FindNeighbors with the default argument k.param=20. We then  
709 identified clusters using the Seurat function FindClusters with default resolution  
710 (resolution=0.8), except for donor 1 for which we used a resolution of 0.55.

711  
712 We classified the cell type identities of cells from mouse set 1 using Seurat to project  
713 previously reported reference cell type annotations for the murine intestinal epithelium<sup>2</sup>  
714 onto the present data (Extended Data Fig. 2 and 6). Cell type annotation was refined by  
715 intersecting the transferred annotations and the clusters identified using Seurat, and  
716 resolving ambiguities using the following algorithm:<sup>57</sup> Clusters in which most cells had  
717 the same transferred annotation (this was the case for all clusters except cluster 15):  
718 cells annotated with the majority annotation were retained, cells without the majority  
719 annotation were annotated as “unknown” and not included in the analysis of regionality.  
720 (2) Cluster containing cells with two annotations transferred at high frequency: one  
721 cluster (cluster 15) contained mostly cells annotated as either “transit amplifying” or  
722 “enterocyte”. Cells annotated as one of these two types were retained, all other cells  
723 were annotated as “unknown” and not included in the analysis of regionality. Overall,  
724 cells of unknown identity constituted 7.6% of the total number of cell post-quality control  
725 in the mouse dataset but did not group into a single cluster.

726  
727 All other single cells were annotated by assigning cell type identities based on marker  
728 gene expression<sup>3</sup> (Extended Data Fig. 6, Fig. 12, Fig. 14). Clusters showing moderate  
729 expression of both cycling\_g2m and enterocyte genes were annotated as “enterocyte  
730 progenitors; this annotation was also supported by the spatial observation that clusters  
731 annotated as enterocyte progenitors were found between TA cells and enterocytes in  
732 the UMAP visualization of the cells of the human dataset. Outlier cells that could not be  
733 annotated using existing marker genes (<2% of cells in either donor) were removed.

734

735 Seurat was used throughout our analysis for the generation of violin plots, dot plots,  
736 ridge plots, and marker lists.

737

### 738 **Villus zonation scoring**

739 Matlab version 2018b was used to annotate enterocytes according to their position  
740 along the crypt:villus axis using our previously published strategy<sup>16</sup>. Villus zonation  
741 scores draw from the summed expression of landmark genes<sup>16</sup> and represent the ratio  
742 of the summed expression of the top landmark genes (*tLM*), and the summed  
743 expression of the bottom (*bLM*) and tLM genes (Extended Data Fig. 7). tLM and bLM  
744 were chosen based on the single cell-reconstructed zonation profiles as in<sup>16</sup>, as genes  
745 with a sum-normalized expression above  $10^{-3}$  in at least one of the six villus zones and  
746 a center of mass above 3.5 for tLM or below 2.5 for bLM. The center of mass is average  
747 zone weighted by the expression of the respective gene<sup>16</sup>. An equal number of cells  
748 within the enterocyte clusters were assigned to each of 6 crypt:villus zones, Zones 1 – 6  
749 (Extended Data Fig. 7).

750

### 751 **Calculation of % regionalization and gene expression distance across segments**

752 The Kruskal-Wallis test was used to calculate the percent of regional zonation among  
753 genes with mean sum-normalized expression above  $5 \times 10^{-6}$ . This analysis was only  
754 possible for cell types with  $> 40$  cells per domain. Q-values were produced using the  
755 Benjamini-Hochberg procedure for multiple hypotheses correction. False discovery rate  
756 was set at  $q < 0.05$ . The centers of mass for all enterocyte-expressed genes (Fig. 2a),  
757 crypt-expressed genes (Fig. 5e), and gene markers of specific secretory cell types  
758 (Supplemental Table 1), were calculated across even fifths of the length of the intestine.  
759 For mouse-human correlations, we compared the segment centers of mass using a  
760 mouse-human orthology table based on Ensembl (version 109)<sup>62</sup> using the BioMart data  
761 mining tool. Genes with a sum-normalized expression above  $10^{-5}$  in at least one of the  
762 five segments are shown in the scatterplots in Fig. 2a and 5e. Genes with highest and  
763 lowest segmental centers of mass (reflecting proximal and distal-most expressed  
764 genes) and those with median centers of mass and highest Euclidean distance between

765 the segmental profiles normalized to their maximum (reflecting center-most expressed  
766 genes) were labeled, and colored according to domain identity (Supplemental Table 2) if  
767 applicable.

768  
769 Heatmaps were generated using pheatmap<sup>63</sup> with the average normalized expression of  
770 the 150 genes most highly upregulated per segment in enterocytes (defined as the  
771 combination of cells annotated as differentiated or mature enterocytes) (Fig. 1f,g), or the  
772 top 100 marker genes per segment in intestinal stem cells (Fig. 5A). Because cell  
773 number per segment is variable in the human dataset, segments were grouped into  
774 pairs for this analysis. Heatmaps visualize data from a matrix in which each cell  
775 contains the average expression of a marker gene in each segment. Segments and  
776 genes were clustered based on the Euclidean distance between cells in the matrix. The  
777 optimal number of clusters was identified by computing the gap statistic using the  
778 clusGap function of the R package cluster (version 2.1.4) using default parameters. We  
779 also confirmed that domain divisions were stable when alternate numbers of top  
780 upregulated genes were used (Extended Data Fig. 8c, displaying 75–100 upregulated  
781 genes per segment).

782  
783 To evaluate domain assignments with a different approach, we calculated the Jensen-  
784 Shannon Divergence (JSD)<sup>64,65</sup> for enterocytes and intestinal stem cells on the mouse  
785 dataset (Extended Data Fig. 8d, 15a). To calculate JSD, we assigned a center of mass  
786 to each segment by bivariate Kernel Density Estimation and calculated pairwise JSD  
787 between the resulting vectors. For enterocytes, JSD was calculated for each mouse  
788 individually. Mouse 2, which contains less cells and has more cell number per segment  
789 variability than Mouse 1, had slightly weaker segment ordering (note the positions of  
790 segments 19-20) than Mouse 1, but mis-ordering was confined to domains and did not  
791 ultimately affect our interpretation of appropriate boundary divisions.

792  
793 Domain-defining signature score (Fig. 2c,d) is a z-score metric representing the mean  
794 expression of the 20 most differentially expressed genes in a given absorption domain.



795 The signature scores were computed from scaled and centered gene expression data  
796 following SCTransform in Seurat.

797

### 798 **Non-negative matrix factorization analysis**

799 We performed non-negative matrix factorization analysis using the cNMF package  
800 version 1.4 in R<sup>66</sup>. We used the raw count matrixes for a given subset of cells as input to  
801 cNMF, and ran cNMF with default parameters. For visualization of the results, we  
802 selected the 250 genes with the strongest contribution to a component and used the  
803 Seurat function AverageExpression to compute the averaged expression of the selected  
804 genes.

805

### 806 **Prediction of intestinal domain locations using transfer learning**

807 We performed the computational transfer of domain labels from mouse datasets with  
808 known domain assignment (training datasets) to datasets with unknown domain position  
809 (test dataset) by transfer learning using the cFIT package version 0.0.0.90 in R<sup>18</sup>. We  
810 used the raw count matrixes for enterocytes and mature enterocytes as input to cFIT.  
811 All cells (both the training and test sets) were labeled according to their experimental  
812 batch. Cells from the training sets were also labeled according to their previously  
813 assigned domains. cFIT was run with default parameters and requesting 15 number of  
814 factors of the common factor matrix (shared across training and test datasets). We used  
815 the following datasets:

| TRAINING DATASET                               | TEST DATASET                                                                                                |
|------------------------------------------------|-------------------------------------------------------------------------------------------------------------|
| Mouse set 1                                    | Dataset GSE92332_Regional_UMIcounts (GEO database) collected from duodenum, jejunum, and ileum <sup>2</sup> |
| Mouse set 1                                    | Mouse set 2 +<br>Mouse chow diet                                                                            |
| Mouse set 1 + mouse set 2 +<br>mouse chow diet | Mouse fat-free diet +<br>Mouse high-fat diet                                                                |

816

### 817 **Functional pathway analysis**

818 Pathways enriched in each mouse and human absorption domain (adjusted p value <  
819 0.02, Fig. 4a, Supplementary Table 5) or regionally variable NMF component (adjusted  
820 p value < 0.04, Extended Data Fig. 13) were identified using the ReactomePA  
821 enrichPathway tool and compared using the clusterProfiler package<sup>67</sup>. Selected  
822 pathways associated with nutrient metabolism are shown. Pathways were edited to  
823 remove redundancy and plotted with ggplot2.

824

### 825 **Evaluation of transcriptional control of domain identity**

826 We first used ChIP-X Enrichment Analysis 3 (ChEA3)<sup>32</sup> to identify transcription factors  
827 predicted to control genes differentially expressed in enterocytes from each absorption  
828 domain. We repeated this analysis for enterocytes, TA cells, and ISCs, such that we  
829 might evaluate which transcription factors expressed by each of these cell types is  
830 predicted to control domain-specific expression in enterocytes. Transcription factor  
831 enrichment results generated with this approach (Supplementary Table 7) are based  
832 and ranked according to several types of data including transcription factor-gene  
833 association in RNAseq and ChIP-seq datasets, and co-occurrences in submitted gene  
834 lists. We also used SCENIC<sup>33,68</sup> to infer Gene Regulatory Networks based on co-  
835 expression and motif analysis of transcription factors and targets which were then  
836 analyzed in individual differentiated and mature enterocytes (Supplementary Table 8).

837

838 To evaluate expression of each transcription factor along stages of absorptive cell  
839 differentiation, from ISC to enterocyte, we used Slingshot<sup>34</sup> to infer differentiation  
840 pseudotime for all absorptive cells and order the cells accordingly.

841

842 Transcription factors were evaluated according to their predictive rank in ChEA3,  
843 convergent identification in ChEA3 and SCENIC analyses, and regional expression  
844 across domains (Extended Data Fig. 17). We grouped transcription factors according to  
845 highest expression at early (ISC/TA cell) or late (enterocyte precursor or later) stages of  
846 the absorptive lineage (Extended Data Fig. 18).

847

#### 848 Visualization of regional marker transcripts

849 Full-length murine small intestinal tissue or transverse cross sections of human  
850 intestines from indicated domains were immersed in 4% PFA for 24-48h at room  
851 temperature and EtOH for 24 hours at 4°. Murine small intestines were coiled into a  
852 'swiss roll' from an outer proximal tip to an inner distal tip. All tissue underwent standard  
853 dehydration and paraffin embedding.

854

855 The RNAscope Multiplex Fluorescent V2 Assay (Advanced Cell Diagnostics) was used  
856 according to the manufacturer's instructions to probe for transcripts of interest. Entire  
857 swiss rolls were captured with a Leica DMI8 microscope equipped with LAS X Software  
858 and an automated stage, allowing for tilescan imaging of frames at a 20X magnification;  
859 3-5 individual images were acquired per region from each donor. Regional patterns of  
860 selected individual marker transcripts were confirmed on at least three mice each and in  
861 3-4 donors per domain, including the 2 donors sequenced in this study. Images of  
862 individual murine crypts and crypt-villus units were also captured using a Zeiss LSM900  
863 confocal microscope.

864

865 For morphometric analysis of villus height (Extended Data Fig. 10), the lengths of  
866 tilescanned swiss rolls were tracked using a custom macro for Fiji<sup>69</sup>, allowing

867 assignment of the precise positions of 30 equal segments. Villus base to tip distances  
868 were measured for 3-5 villi in each segment, for each of 4 mice. One-way ANOVA  
869 followed by Tukey's multiple comparisons test for villus heights across all segments in  
870 each domain was performed using Prism software (GraphPad Prism version 8 for  
871 MacOS).

872  
873 Human tissue images were analyzed using a custom script in QuPath software<sup>70</sup>.  
874 Briefly, nuclei detection was performed using StarDist2D and cell segmentation was  
875 performed with the cell expansion variable set to 10  $\mu$ m. The mean fluorescence value  
876 for each cell was plotted (Fig. 3c), and one-way ANOVA to compare mean fluorescence  
877 in each donor by domain was performed (Extended Data Fig. 11b) using Prism.

878

#### 879 Investigation and genetic perturbation of regional organoids

##### 880 **Generation and qPCR evaluation of regional organoids**

881 Intestinal crypts were isolated from domains A-E of fresh intestinal tissue using methods  
882 previously described<sup>71</sup>.

883 For evaluation of gene expression with qPCR or mRNAseq, organoids that had been  
884 cultured for at least 1 month (5–13 weeks), and 5–6 days after passaging, were washed  
885 with PBS and resuspended in TRI reagent containing 1% 2-Mercaptoethanol. RNA was  
886 extracted using Direct-zol RNA Miniprep Plus (Zymo Research) and cDNA reverse  
887 transcribed with High Capacity cDNA Reverse Transcription Kit (Applied Biosystems)  
888 according to the manufacturer's instructions. qPCR using the primers listed in  
889 Supplementary Table 8 was performed using a C1000 Touch Thermal Cycler (Biorad).

890

##### 891 **CRISPR-mediated gene disruption**

892 Two single guide RNAs (sgRNAs) were designed for each target using the Benchling  
893 CRISPR Guide RNA Design tool (<https://www.benchling.com/crispr/>). Following  
894 previously described methods<sup>72</sup> and using BstXI (Thermo Fast Digest, cat: FD1024) and  
895 BlnI (Thermo Fast Digest isoschizomer Bpu1102I, cat: FD0094) restriction enzymes, we  
896 inserted a sgRNA into the pU6sgRNA-EF1alpha-puro-T2A-BFP single cassette vector,



897 which expresses the mouse U6 (mU6) promoter and constant region 1 (cr1)<sup>73</sup>, and the  
898 second sgRNA into pMJ117, which expressed the modified human U6 (hU6) promoter  
899 and cr3<sup>74</sup>. sgRNA sequences, and primers used for subsequent PCR amplification  
900 (Q5 Hot Start High-Fidelity 2X Master Mix, NEB) of sgRNA expression cassettes are  
901 provided in Supplementary Table 8. pU6sgRNA-EF1alpha-puro-T2A-BFP was then  
902 digested with XhoI and XbaI (NE Biolabs) and gel purified along with PCR fragments.  
903 sgRNAs were then incorporated into the pU6sgRNA-EF1alpha-puro-T2A-BFP  
904 backbone using NEBuilder® HiFi DNA Assembly Master Mix (NE Biolabs) according to  
905 manufacturer's instructions. Lentivirus was produced from the resulting dual sgRNA  
906 constructs by the UCSF Viracore. Virus was concentrated using Lenti-X Concentrator  
907 (Takara Biosciences).

908 To increase the efficiency of CRISPR mutagenesis, we also used a second strategy  
909 based on simultaneous delivery of Cas9 and sgRNA by lentiviral vectors. Using Esp3I  
910 restriction enzyme (New England Biolabs, cat: R0734S) we inserted each sgRNA into  
911 lentiCRISPR v2 (Addgene 52961) which allows simultaneous expression of gRNA driven  
912 by U6 promoter and Cas9/PuroR driven by EF1alpha. Cloning was performed as  
913 described<sup>75</sup>, and successful insertion of sgRNA sequence was validated by Sanger  
914 Sequencing using primer 5'-GCACCGACTCGGTGCCAC-3'. sgRNA sequences are  
915 provided in Supplementary Table 9. Lentivirus was produced from the resulting vectors  
916 as described<sup>75</sup>.

917 Lentiviral transduction of adult, regional organoids for all experiments were performed  
918 as described<sup>76</sup>. Briefly, intestinal organoids were grown for at least 4 days prior to  
919 infection in "ENRWNTNIC" (50% growth medium/50% Wnt-cultured medium and 10mM  
920 nicotinamide), supplemented with 10uM Y-27632, and 2.5uM CHIR to induce spheroid  
921 formation. Stem cell-enriched spheroids were broken into single cells for the addition of  
922 viral mix containing 8ug/ml polybrene, followed by a 1 hour spinoculation, and a 6 hour  
923 incubation at 37°. Infected cells were then plated in Matrigel. Puromycin selection was  
924 performed 72 hours after recovery. Spheroids were converted to organoids over the  
925 course of approximately 7 days by gradual transition of ENRWNTNIC to ENR medium.

926

927 Infected organoids were expanded and, for strategy 1, treated with 4-hydroxytamoxifen  
928 to induce Cre recombinase-dependent expression of Cas9 endonuclease and EGFP.  
929 From these cultures, organoids were passaged at a low density (strategy 2), or small  
930 numbers (1-100) of single, BFP+ (transduced), GFP+ (tamoxifen-induced) cells were  
931 sorted into individual, Matrigel-coated wells of a 96-well plate (strategy 1), in both cases  
932 allowing for precise manual isolation of individual organoids. After ~10 days of growth,  
933 single mature organoids were collected and used for clonal expansion. To confirm  
934 genetic disruption, genomic DNA was isolated (Lysis and Neutralization Solutions for  
935 Blood, Sigma), genotyped with PCR, and the mutant alleles were sequenced (primers,  
936 Supplementary Table 9). Clones carrying the wild-type alleles were excluded and only  
937 the clones with deleterious alleles were used for the downstream analyses.

938

### 939 **mRNAseq of regional organoids**

940 RNA was collected from confirmed mutant organoid clones, transduced organoids  
941 uninduced by OHT, and untreated organoids as described above for qPCR evaluation.  
942 All organoid lines were cultured for 5–6 days post-passaging to ensure consistent and  
943 complete differentiation status across samples. RNA sample QC, mRNAseq library  
944 preparation, and mRNAseq (Illumina, PE150, 20M Paired Reads) was performed by  
945 Novogene.

946

947 Genome indexing and quantification of transcript abundances by pseudoalignment were  
948 performed using Kallisto version 0.46.0<sup>77</sup>. Non-expressed genes were filtered by  
949 retaining genes with > 5 reads in at least 4 samples. RUVseq<sup>78</sup> was used to control for  
950 “unwanted variation” between samples. Differentially expressed genes in mutant  
951 organoids compared to untreated organoids were identified using EdgeR. Since mutant  
952 organoids were assayed without replication, data dispersion was estimated from all but  
953 the 5,000 most variable genes in the entire dataset.

954

955 **Acknowledgements:** We are grateful to Hikaru Miyazaki, David Castillo-Azofeifa, and  
956 other members of the Klein lab for valuable discussions, experimental assistance, and  
957 protocol development. We thank Michael Helmrath, Noah Shroyer, Yuan-Hung Lo and  
958 members of the Intestinal Stem Cell Consortium for critical scientific input throughout  
959 this project. Thank you also to Benjamin Ohlstein, Ina Chen, Keren Bahar Halpern, Zuri  
960 Sullivan, Danny Conrad, Jess Sheu-Gruttadauria, Jeffrey Bush, and Eric Chow for  
961 sharing data, resources, and expertise. This study benefited from the following cores  
962 and facilities at UCSF: the Center for Advanced Technology, the Institute for Human  
963 Genetics, Parnassus Flow Cytometry Core, ViraCore, Viable Tissue Acquisition Lab,  
964 and the Laboratory Animal Resource Center. Portions of schematic Figure panels were  
965 created with BioRender.com. This work was funded by NIH R35-DE026602 and by  
966 U01DK103147 from the Intestinal Stem Cell Consortium, a collaborative research  
967 project funded by the National Institute of Diabetes and Digestive and Kidney Diseases  
968 and the National Institute of Allergy and Infectious Diseases, to O.D.K. R.K.Z. was  
969 supported by NIH F32 DK125089 and an American Cancer Society – South Florida  
970 Research Council Postdoctoral Fellowship (PF-20-037-01-DDC). Finally, our most  
971 sincere gratitude to Donor Network West, and to the organ donor and the donor’s family  
972 for their generosity in supporting basic science research.

973

974 **Data Availability:** The datasets generated and analyzed during the current study are  
975 available in the GEO repository, accession GSE201859.

976

977

978 **Author contributions:** R.K.Z. and O.D.K. conceived and developed the study, R.K.Z.  
979 conceived and planned experiments, R.K.Z., C.S.M., S.I., and D.B. developed the  
980 analysis strategy and performed data analysis, D.B. conceived several computational  
981 approaches, and supervised and verified the analytical methods, R.K.Z. L.W., K.L.M.,  
982 E.R., A.R., and V.N. carried out experiments, A.R.G. and J.M.G. facilitated the human  
983 intestinal tissue donation, Z.J.G., R.M.L, J.M.G, and S.I. provided intellectual review of

984 project content, and R.K.Z., D.B. and O.D.K. wrote the manuscript with input from all  
985 authors.

986

987 **Competing interests:** The authors declare no competing interests.

988

## 989 **References**

- 990 1 San Roman, A. K. & Shivdasani, R. A. Boundaries, junctions and transitions in  
991 the gastrointestinal tract. *Exp Cell Res* **317**, 2711-2718 (2011).  
992 <https://doi.org/10.1016/j.yexcr.2011.07.011>
- 993 2 Haber, A. L. *et al.* A single-cell survey of the small intestinal epithelium. *Nature*  
994 **551**, 333-339 (2017). <https://doi.org/10.1038/nature24489>
- 995 3 Elmentaite, R. *et al.* Cells of the human intestinal tract mapped across space and  
996 time. *Nature* **597**, 250-255 (2021). <https://doi.org/10.1038/s41586-021-03852-1>
- 997 4 Burclaff, J. *et al.* A proximal-to-distal survey of healthy adult human small  
998 intestine and colon epithelium by single-cell transcriptomics. *Cell Mol Gastroenter*  
999 (2022).
- 1000 5 Wang, Y. *et al.* Single-cell transcriptome analysis reveals differential nutrient  
1001 absorption functions in human intestine. *Journal of Experimental Medicine* **217**,  
1002 jem.20191130 (2020). <https://doi.org/10.1084/jem.20191130>
- 1003 6 Hickey, J. W. *et al.* Organization of the human intestine at single-cell resolution.  
1004 *Nature* **619**, 572-584 (2023). <https://doi.org/10.1038/s41586-023-05915-x>
- 1005 7 Fawcner-Corbett, D. *et al.* Spatiotemporal analysis of human intestinal  
1006 development at single-cell resolution. *Cell* **184**, 810-826.e823 (2021).  
1007 <https://doi.org/10.1016/j.cell.2020.12.016>
- 1008 8 Zwick, R. K., Ohlstein, B. & Klein, O. D. Intestinal renewal across the animal  
1009 kingdom: comparing stem cell activity in mouse and *Drosophila*. *Am J Physiol*  
1010 *Gastrointest Liver Physiol* **316**, G313-G322 (2019).  
1011 <https://doi.org/10.1152/ajpgi.00353.2018>
- 1012 9 Buchon, N. *et al.* Morphological and molecular characterization of adult midgut  
1013 compartmentalization in *Drosophila*. *Cell Rep* **3**, 1725-1738 (2013).  
1014 <https://doi.org/10.1016/j.celrep.2013.04.001>
- 1015 10 Marianes, A. & Spradling, A. C. Physiological and stem cell compartmentalization  
1016 within the *Drosophila* midgut. *Elife* **2** (2013). <https://doi.org/ARTN e00886>  
1017 10.7554/eLife.00886
- 1018 11 Driver, I. & Ohlstein, B. Specification of regional intestinal stem cell identity  
1019 during *Drosophila* metamorphosis. *Development* **141**, 1848-1856 (2014).  
1020 <https://doi.org/10.1242/dev.104018>
- 1021 12 Middendorp, S. *et al.* Adult Stem Cells in the Small Intestine Are Intrinsically  
1022 Programmed with Their Location-Specific Function. *Stem Cells* **32**, 1083-1091  
1023 (2014). <https://doi.org/10.1002/stem.1655>



- 1024 13 Kayisoglu, O. *et al.* Location-specific cell identity rather than exposure to GI  
1025 microbiota defines many innate immune signalling cascades in the gut  
1026 epithelium. *Gut* **70**, 687-+ (2021). <https://doi.org/10.1136/gutjnl-2019-319919>  
1027 14 Kraiczy, J. *et al.* DNA methylation defines regional identity of human intestinal  
1028 epithelial organoids and undergoes dynamic changes during development. *Gut*  
1029 **68**, 49-61 (2019). <https://doi.org/10.1136/gutjnl-2017-314817>  
1030 15 McGinnis, C. S. *et al.* MULTI-seq: sample multiplexing for single-cell RNA  
1031 sequencing using lipid-tagged indices. *Nat Methods* **16**, 619-+ (2019).  
1032 <https://doi.org/10.1038/s41592-019-0433-8>  
1033 16 Moor, A. E. *et al.* Spatial Reconstruction of Single Enterocytes Uncovers Broad  
1034 Zonation along the Intestinal Villus Axis. *Cell* **175**, 1156-1167 e1115 (2018).  
1035 <https://doi.org/10.1016/j.cell.2018.08.063>  
1036 17 Tibshirani, R., Walther, G. & Hastie, T. Estimating the Number of Clusters in a  
1037 Data Set Via the Gap Statistic. *Journal of the Royal Statistical Society Series B:*  
1038 *Statistical Methodology* **63**, 411-423 (2001). [https://doi.org/10.1111/1467-](https://doi.org/10.1111/1467-9868.00293)  
1039 [9868.00293](https://doi.org/10.1111/1467-9868.00293)  
1040 18 Peng, M., Li, Y., Wamsley, B., Wei, Y. & Roeder, K. Integration and transfer  
1041 learning of single-cell transcriptomes via cFIT. *Proceedings of the National*  
1042 *Academy of Sciences* **118**, e2024383118 (2021).  
1043 <https://doi.org/10.1073/pnas.2024383118>  
1044 19 Sullivan, Z. A. *et al.* gammadelta T cells regulate the intestinal response to  
1045 nutrient sensing. *Science* **371** (2021). <https://doi.org/10.1126/science.aba8310>  
1046 20 Enriquez, J. R. *et al.* A dietary change to a high-fat diet initiates a rapid  
1047 adaptation of the intestine. *Cell Reports* **41**, 111641 (2022).  
1048 <https://doi.org/10.1016/j.celrep.2022.111641>  
1049 21 Goda, T. Regulation of the expression of carbohydrate digestion/absorption-  
1050 related genes. *Br J Nutr* **84 Suppl 2**, S245-248 (2000).  
1051 <https://doi.org/10.1079/096582197388626>  
1052 22 Ko, C.-W., Qu, J., Black, D. D. & Tso, P. Regulation of intestinal lipid metabolism:  
1053 current concepts and relevance to disease. *Nature Reviews Gastroenterology*  
1054 *& Hepatology* **17**, 169-183 (2020). [https://doi.org/10.1038/s41575-019-0250-](https://doi.org/10.1038/s41575-019-0250-7)  
1055 [7](https://doi.org/10.1038/s41575-019-0250-7)  
1056 23 Gebert, N. *et al.* Region-Specific Proteome Changes of the Intestinal Epithelium  
1057 during Aging and Dietary Restriction. *Cell Reports* **31** (2020).  
1058 <https://doi.org/ARTN107565>  
1059 [10.1016/j.celrep.2020.107565](https://doi.org/10.1016/j.celrep.2020.107565)  
1060 24 Biton, M. *et al.* T Helper Cell Cytokines Modulate Intestinal Stem Cell Renewal  
1061 and Differentiation. *Cell* **175**, 1307-1320.e1322 (2018).  
1062 <https://doi.org/10.1016/j.cell.2018.10.008>  
1063 25 Maimets, M. *et al.* Mesenchymal-epithelial crosstalk shapes intestinal  
1064 regionalisation via Wnt and Shh signalling. *Nat Commun* **13**, 715 (2022).  
1065 <https://doi.org/10.1038/s41467-022-28369-7>

- 1066 26 Spence, J. R., Lauf, R. & Shroyer, N. F. Vertebrate Intestinal Endoderm  
1067 Development. *Dev Dynam* **240**, 501-520 (2011).  
1068 <https://doi.org/10.1002/dvdy.22540>
- 1069 27 Thompson, C. A., DeLaForest, A. & Battle, M. A. Patterning the gastrointestinal  
1070 epithelium to confer regional-specific functions. *Dev Biol* **435**, 97-108 (2018).  
1071 <https://doi.org/10.1016/j.ydbio.2018.01.006>
- 1072 28 Thompson, C. A. *et al.* GATA4 Is Sufficient to Establish Jejunal Versus Ileal  
1073 Identity in the Small Intestine. *Cell Mol Gastroenter* **3**, 422-446 (2017).  
1074 <https://doi.org/10.1016/j.jcmgh.2016.12.009>
- 1075 29 Chen, C., Fang, R. X., Davis, C., Maravelias, C. & Sibley, E. Pdx1 inactivation  
1076 restricted to the intestinal epithelium in mice alters duodenal gene expression in  
1077 enterocytes and enteroendocrine cells. *Am J Physiol-Gastr L* **297**, G1126-G1137  
1078 (2009). <https://doi.org/10.1152/ajpgi.90586.2008>
- 1079 30 Battle, M. A. *et al.* GATA4 Is Essential for Jejunal Function in Mice.  
1080 *Gastroenterology* **135**, 1676-1686 (2008).  
1081 <https://doi.org/10.1053/j.gastro.2008.07.074>
- 1082 31 Bosse, T. *et al.* Gata4 is essential for the maintenance of Jejunal-Ileal identities  
1083 in the adult mouse small intestine. *Molecular and Cellular Biology* **26**, 9060-9070  
1084 (2006). <https://doi.org/10.1128/Mcb.00124-06>
- 1085 32 Keenan, A. B. *et al.* ChEA3: transcription factor enrichment analysis by  
1086 orthogonal omics integration. *Nucleic Acids Res* **47**, W212-W224 (2019).  
1087 <https://doi.org/10.1093/nar/gkz446>
- 1088 33 Aibar, S. *et al.* SCENIC: single-cell regulatory network inference and clustering.  
1089 *Nat Methods* **14**, 1083-1086 (2017). <https://doi.org/10.1038/nmeth.4463>
- 1090 34 Street, K. *et al.* Slingshot: cell lineage and pseudotime inference for single-cell  
1091 transcriptomics. *Bmc Genomics* **19** (2018). <https://doi.org/ARTN> 477  
1092 10.1186/s12864-018-4772-0
- 1093 35 Zorn, A. M. & Wells, J. M. Vertebrate endoderm development and organ  
1094 formation. *Annu Rev Cell Dev Biol* **25**, 221-251 (2009).  
1095 <https://doi.org/10.1146/annurev.cellbio.042308.113344>
- 1096 36 Verzi, M. P., Shin, H., Ho, L. L., Liu, X. S. & Shivdasani, R. A. Essential and  
1097 redundant functions of caudal family proteins in activating adult intestinal genes.  
1098 *Mol Cell Biol* **31**, 2026-2039 (2011). <https://doi.org/10.1128/MCB.01250-10>
- 1099 37 Hryniuk, A., Grainger, S., Savory, J. G. A. & Lohnes, D. Cdx function is required  
1100 for maintenance of intestinal identity in the adult. *Dev Biol* **363**, 426-437 (2012).  
1101 <https://doi.org/10.1016/j.ydbio.2012.01.010>
- 1102 38 Bonhomme, C. *et al.* Cdx1, a dispensable homeobox gene for gut development  
1103 with limited effect in intestinal cancer. *Oncogene* **27**, 4497-4502 (2008).  
1104 <https://doi.org/10.1038/onc.2008.78>
- 1105 39 Doktorova, M. *et al.* Intestinal PPARdelta protects against diet-induced obesity,  
1106 insulin resistance and dyslipidemia. *Sci Rep* **7**, 846 (2017).  
1107 <https://doi.org/10.1038/s41598-017-00889-z>
- 1108 40 Beyaz, S. *et al.* High-fat diet enhances stemness and tumorigenicity of intestinal  
1109 progenitors. *Nature* **531**, 53-58 (2016). <https://doi.org/10.1038/nature17173>

- 1110 41 Mana, M. D. *et al.* High-fat diet-activated fatty acid oxidation mediates intestinal  
1111 stemness and tumorigenicity. *Cell Reports* **35**, 109212 (2021).  
1112 <https://doi.org/10.1016/j.celrep.2021.109212>
- 1113 42 Cheng, C. W. *et al.* Ketone Body Signaling Mediates Intestinal Stem Cell  
1114 Homeostasis and Adaptation to Diet. *Cell* **178**, 1115-1131 e1115 (2019).  
1115 <https://doi.org/10.1016/j.cell.2019.07.048>
- 1116 43 Stine, R. R. *et al.* PRDM16 Maintains Homeostasis of the Intestinal Epithelium by  
1117 Controlling Region-Specific Metabolism. *Cell Stem Cell* **25**, 830-+ (2019).  
1118 <https://doi.org/10.1016/j.stem.2019.08.017>
- 1119 44 Obniski, R., Sieber, M. & Spradling, A. C. Dietary Lipids Modulate Notch  
1120 Signaling and Influence Adult Intestinal Development and Metabolism in  
1121 *Drosophila*. *Dev Cell* **47**, 98-111 e115 (2018).  
1122 <https://doi.org/10.1016/j.devcel.2018.08.013>
- 1123 45 Seiler, K. M. *et al.* Single-Cell Analysis Reveals Regional Reprogramming During  
1124 Adaptation to Massive Small Bowel Resection in Mice. *Cell Mol Gastroenterol*  
1125 *Hepatol* **8**, 407-426 (2019). <https://doi.org/10.1016/j.jcmgh.2019.06.001>
- 1126 46 Nusse, Y. M. *et al.* Parasitic helminths induce fetal-like reversion in the intestinal  
1127 stem cell niche. *Nature* **559**, 109-113 (2018). [https://doi.org/10.1038/s41586-018-](https://doi.org/10.1038/s41586-018-0257-1)  
1128 [0257-1](https://doi.org/10.1038/s41586-018-0257-1)
- 1129 47 Schneider, C. *et al.* A Metabolite-Triggered Tuft Cell-ILC2 Circuit Drives Small  
1130 Intestinal Remodeling. *Cell* **174**, 271-284 e214 (2018).  
1131 <https://doi.org/10.1016/j.cell.2018.05.014>
- 1132 48 Gajendran, M., Loganathan, P., Catinella, A. P. & Hashash, J. G. A  
1133 comprehensive review and update on Crohn's disease. *Dis Mon* **64**, 20-57  
1134 (2018). <https://doi.org/10.1016/j.disamonth.2017.07.001>
- 1135 49 Pan, S. Y. & Morrison, H. Epidemiology of cancer of the small intestine. *World J*  
1136 *Gastrointest Oncol* **3**, 33-42 (2011). <https://doi.org/10.4251/wjgo.v3.i3.33>
- 1137 50 Schottenfeld, D., Beebe-Dimmer, J. L. & Vigneau, F. D. The epidemiology and  
1138 pathogenesis of neoplasia in the small intestine. *Ann Epidemiol* **19**, 58-69 (2009).  
1139 <https://doi.org/10.1016/j.annepidem.2008.10.004>
- 1140 51 Tian, H. *et al.* A reserve stem cell population in small intestine renders Lgr5-  
1141 positive cells dispensable. *Nature* **478**, 255-259 (2011).  
1142 <https://doi.org/10.1038/nature10408>
- 1143 52 Huch, M. *et al.* In vitro expansion of single Lgr5+ liver stem cells induced by Wnt-  
1144 driven regeneration. *Nature* **494**, 247-250 (2013).  
1145 <https://doi.org/10.1038/nature11826>
- 1146 53 Platt, R. J. *et al.* CRISPR-Cas9 knockin mice for genome editing and cancer  
1147 modeling. *Cell* **159**, 440-455 (2014). <https://doi.org/10.1016/j.cell.2014.09.014>
- 1148 54 Madisen, L. *et al.* A robust and high-throughput Cre reporting and  
1149 characterization system for the whole mouse brain. *Nat Neurosci* **13**, 133-U311  
1150 (2010). <https://doi.org/10.1038/nn.2467>
- 1151 55 Smillie, C. S. *et al.* Intra- and Inter-cellular Rewiring of the Human Colon during  
1152 Ulcerative Colitis. *Cell* **178**, 714-730 e722 (2019).  
1153 <https://doi.org/10.1016/j.cell.2019.06.029>

- 1154 56 Melsted, P. *et al.* Modular, efficient and constant-memory single-cell RNA-seq  
1155 preprocessing. *Nat Biotechnol* **39**, 813-818 (2021).  
1156 <https://doi.org/10.1038/s41587-021-00870-2>
- 1157 57 Lun, A. T. L. *et al.* EmptyDrops: distinguishing cells from empty droplets in  
1158 droplet-based single-cell RNA sequencing data. *Genome Biol* **20**, 63 (2019).  
1159 <https://doi.org/10.1186/s13059-019-1662-y>
- 1160 58 Zhu, Q., Conrad, D. N. & Gartner, Z. J. *deMULTiplex2: robust sample*  
1161 *demultiplexing for scRNA-seq* (Cold Spring Harbor Laboratory, 2023).
- 1162 59 Alquicira-Hernandez, J., Sathe, A., Ji, H. P., Nguyen, Q. & Powell, J. E. scPred:  
1163 accurate supervised method for cell-type classification from single-cell RNA-seq  
1164 data. *Genome Biol* **20**, 264 (2019). <https://doi.org/10.1186/s13059-019-1862-5>
- 1165 60 Stuart, T. *et al.* Comprehensive Integration of Single-Cell Data. *Cell* **177**, 1888-  
1166 1902 e1821 (2019). <https://doi.org/10.1016/j.cell.2019.05.031>
- 1167 61 Hafemeister, C. & Satija, R. Normalization and variance stabilization of single-cell  
1168 RNA-seq data using regularized negative binomial regression. *Genome Biology*  
1169 **20** (2019). <https://doi.org/ARTN> 296  
1170 10.1186/s13059-019-1874-1
- 1171 62 Cunningham, F. *et al.* Ensembl 2022. *Nucleic Acids Res* **50**, D988-D995 (2022).  
1172 <https://doi.org/10.1093/nar/gkab1049>
- 1173 63 Kolde, R. Pheatmap: pretty heatmaps. **R package version 1.2** (2012).
- 1174 64 Lin, J. H. Divergence Measures Based on the Shannon Entropy. *Ieee T Inform*  
1175 *Theory* **37**, 145-151 (1991). <https://doi.org/Doi> 10.1109/18.61115
- 1176 65 Drost, H.-G.  
1177 Philentropy: Information Theory and Distance Quantification with R. *The Journal*  
1178 *of Open Source Software* **3(26)** (2018).
- 1179 66 Kotliar, D. *et al.* Identifying gene expression programs of cell-type identity and  
1180 cellular activity with single-cell RNA-Seq. *Elife* **8** (2019).  
1181 <https://doi.org/10.7554/eLife.43803>
- 1182 67 Wu, T. Z. *et al.* clusterProfiler 4.0: A universal enrichment tool for interpreting  
1183 omics data. *Innovation-Amsterdam* **2** (2021). <https://doi.org/ARTN> 100141  
1184 10.1016/j.xinn.2021.100141
- 1185 68 van de Sande, B. *et al.* A scalable SCENIC workflow for single-cell gene  
1186 regulatory network analysis. *Nat Protoc* **15**, 2247-2276 (2020).  
1187 <https://doi.org/10.1038/s41596-020-0336-2>
- 1188 69 Schindelin, J. *et al.* Fiji: an open-source platform for biological-image analysis.  
1189 *Nat Methods* **9**, 676-682 (2012). <https://doi.org/10.1038/nmeth.2019>
- 1190 70 Bankhead, P. *et al.* QuPath: Open source software for digital pathology image  
1191 analysis. *Scientific Reports* **7** (2017). [https://doi.org/10.1038/s41598-017-17204-](https://doi.org/10.1038/s41598-017-17204-5)  
1192 [5](https://doi.org/10.1038/s41598-017-17204-5)
- 1193 71 Castillo-Azofeifa, D. *et al.* Atoh1(+) secretory progenitors possess renewal  
1194 capacity independent of Lgr5(+) cells during colonic regeneration. *EMBO J* **38**  
1195 (2019). <https://doi.org/10.15252/embj.201899984>



- 1196 72 McKinley, K. L. Employing CRISPR/Cas9 genome engineering to dissect the  
1197 molecular requirements for mitosis. *Methods Cell Biol* **144**, 75-105 (2018).  
1198 <https://doi.org/10.1016/bs.mcb.2018.03.003>
- 1199 73 Gilbert, L. A. *et al.* Genome-Scale CRISPR-Mediated Control of Gene  
1200 Repression and Activation. *Cell* **159**, 647-661 (2014).  
1201 <https://doi.org/10.1016/j.cell.2014.09.029>
- 1202 74 Adamson, B. *et al.* A Multiplexed Single-Cell CRISPR Screening Platform  
1203 Enables Systematic Dissection of the Unfolded Protein Response. *Cell* **167**,  
1204 1867-+ (2016). <https://doi.org/10.1016/j.cell.2016.11.048>
- 1205 75 Sanjana, N. E., Shalem, O. & Zhang, F. Improved vectors and genome-wide  
1206 libraries for CRISPR screening. *Nat Methods* **11**, 783-784 (2014).  
1207 <https://doi.org/10.1038/nmeth.3047>
- 1208 76 Koo, B. K. *et al.* Controlled gene expression in primary Lgr5 organoid cultures.  
1209 *Nat Methods* **9**, 81-U197 (2012). <https://doi.org/10.1038/Nmeth.1802>
- 1210 77 Bray, N. L., Pimentel, H., Melsted, P. & Pachter, L. Near-optimal probabilistic  
1211 RNA-seq quantification (vol 34, pg 525, 2016). *Nat Biotechnol* **34**, 888-888  
1212 (2016). [https://doi.org/DOI 10.1038/nbt0816-888d](https://doi.org/DOI%2010.1038/nbt0816-888d)
- 1213 78 Risso, D., Ngai, J., Speed, T. P. & Dudoit, S. Normalization of RNA-seq data  
1214 using factor analysis of control genes or samples. *Nat Biotechnol* **32**, 896-902  
1215 (2014). <https://doi.org/10.1038/nbt.2931>  
1216
